# Supplementary material for: Genetic compendium of 1511 human brains available through the UK Medical Research Council Brain Banks Network Resource
Source: HighWire-hosted journal article supplement (doi:10.1101/gr.210609.116), 2016-12-21
Supplement: Supplemental_Clinical_data.xlsx [file Supplemental_Clinical_data.xlsx]

## Sheet: Information
General Information
The following tabs show the clinical phenotypes corresponding to all 313 non-synonymous rare variants (MAF < 0.5%) identified in 42 genes associated with monogenic forms of neurodegenerative disorders (Supplemental Table S2)
In addition, rare monogenic cases with confirmed monogenic forms of disease are also shown in the 'Pathogenic_heterozygous' and 'Pathogenic_recessive' tabs
A description of clinical data for each phenotype associated with each variant is shown, and variants are divided by ACMG pathogenicity criteria.
All variant positions are with respect to GRCh37 build. Minor Allele Frequencies (MAF) from the 1000Genomes (1000G), NHLBI 6500 ESP and ExAC databases are given together with in-silico prediction by SIFT (Kumar et al. 2009) and PolyPhen2 (Adzhubei et al. 2010).
Key; MND – Motor Neuron Disease, CJD – Creutzfelt-Jakob Disease, AD – Alzheimer’s disease, CADASIL – Cerebral Autosomal-Dominant Arteriopathy with Subcortical Infarcts and Leukoencephalopathy.
References
	Kumar P, Henikoff S, Ng PC (2009) Predicting the effects of coding non-synonymous variants on protein function using the SIFT algorithm. Nat Protoc 4:1073-1081
	Adzhubei IA, Schmidt S, Peshkin L, Ramensky VE, Gerasimova A, Bork P, Kondrashov AS, Sunyaev SR (2010) A method and server for predicting damaging missense mutations. Nat Methods 7:248-249

## Sheet: Pathogenic_heterozygous
Case number	Sex	Age onset (years)	Age death (years)	Family History	Clinical Diagnosis	Neuropath Diagnosis	Chromosome	Position	Gene	Transcript	Protein Change	1000G MAF (%)	ESP6500 MAF (%)	ExAC MAF (%)	SIFT	PolyPhen2
1	Female		73	N	MND	MND	21	33039672	SOD1	c.341T>C	p.I114T	NS	NS	NS	Damaging	Probably Damaging
2	Female		71	Y	MND	MND	21	33039672	SOD1	c.341T>C	p.I114T	NS	NS	NS	Damaging	Probably Damaging
3	Unknown		78	N	MND	MND	21	33039672	SOD1	c.341T>C	p.I114T	NS	NS	NS	Damaging	Probably Damaging
4	Female		43	N	MND	MND	21	33039635	SOD1	c.304G>A	p.D102N	NS	NS	NS	Damaging	Probably Damaging
5	Female		42	Y	MND	MND	21	33039635	SOD1	c.304G>A	p.D102N	NS	NS	NS	Damaging	Probably Damaging
6	Female	36	48	N	MND	MND	21	33039633	SOD1	c.302A>G	p.E101G	NS	NS	NS	Tolerated	Benign
7	Female	60	72	N	AD	AD	14	73664775	PSEN1	c.806G>A; c.794G>A	p.R265H; p.R269H	NS	NS	0	Damaging	Probably Damaging
8	Female	65	77	N	AD	AD	14	73659540	PSEN1	c.725C>A; c.737C>A	p.A246E; p.A242E	NS	NS	NS	Damaging	Possibly Damaging
9	Male		38	N	CJD	AD	14	73653589	PSEN1	c.509C>T; c.497C>T	p.S170F; p.S166F	NS	NS	NS	Damaging	Probably Damaging
10	Female		49	Y	Dementia	AD	14	73640392	PSEN1	c.457C>G; c.445C>G	p.L153V; p.L149V	NS	NS	NS	Damaging	Probably Damaging
11	Male		47	Y	Dementia	AD	14	73640352	PSEN1	c.417G>T; c.405G>T	p.M135I; p.M139I	NS	NS	NS	Tolerated	Benign
12	Male		52	Y	Dementia	AD	14	73685899	PSEN1	c.1294C>T; c.1306C>T	p.P436S; p.P432S	NS	NS	NS	Damaging	Probably Damaging
13	Female		49	N	AD	AD	14	73659512	PSEN1	c.697T>C; c.709T>C	p.F237L; p.F233L	NS	NS	NS	Tolerated	Possibly Damaging
14	Male		43	N	AD	AD	14	73659420	PSEN1	c.605G>A; c.617G>A	p.G202D; p.G206D	NS	NS	NS	Damaging	Probably Damaging
15	Male	53	53	N	CJD	CJD	20	4680497	PRNP	c.631G>C; c.*320G>C	p.E211Q	NS	NS	NS	Tolerated	Possibly Damaging
16	Female	53	53	N	CJD	CJD	20	4680464	PRNP	c.598G>A; c.*287G>A	p.E200K	NS	NS	NS	Damaging	Probably Damaging
17	Female	42	42	Y	CJD	CJD	20	4680464	PRNP	c.598G>A; c.*287G>A	p.E200K	NS	NS	NS	Damaging	Probably Damaging
18	Female	55	56	Y	CJD	CJD	20	4680464	PRNP	c.598G>A; c.*287G>A	p.E200K	NS	NS	NS	Damaging	Probably Damaging
19	Female	54	55	N	CJD	CJD	20	4680464	PRNP	c.598G>A; c.*287G>A	p.E200K	NS	NS	NS	Damaging	Probably Damaging
20	Male	66	66	N	CJD	CJD	20	4680464	PRNP	c.598G>A; c.*287G>A	p.E200K	NS	NS	NS	Damaging	Probably Damaging
21	Male	51	51	Y	CJD	CJD	20	4680464	PRNP	c.598G>A; c.*287G>A	p.E200K	NS	NS	NS	Damaging	Probably Damaging
22	Male	60	61	N	CJD	CJD	20	4680464	PRNP	c.598G>A; c.*287G>A	p.E200K	NS	NS	NS	Damaging	Probably Damaging
23	Male	40	62	Y	CADASIL	CADASIL	19	15302993	NOTCH3	c.457C>T	p.R153C	NS	NS	NS	Damaging	Possibly Damaging
24	Male	65	71	N	Psychiatric	Adult onset gangliosidosis	15	72637818	HEXA		p.R499C	NS	NS	NS	Damaging	Probably Damaging
25	Female	56	57	N	CJD	CJD	17	42427661	GRN	c.415T>C	p.C139R	NS	NS	0.02	Damaging	Probably Damaging
26	Female		72	N	Dementia	FTD	17	42427632	GRN	c.386_389delGTCA	p.Q130fs*125	NS	NS	NS
27	Female	55	60	Y	AD	FTD	17	42426621	GRN	c.86_89dupCCTG	p.C31fs*35	NS	NS	NS
28	Female		61	Y	MND	MND	16	31202739	FUS	c.1561C>T; c.1558C>T; c.1549C>T	p.R517C; p.R521C; p.R520C	NS	NS	NS	Damaging	Benign
29	Male	43	58	N	Kuf's disease	Kuf's disease	20	62562226	DNAJC5		p.L115R	NS	NS	NS	Tolerated	Benign

## Sheet: Pathogenic_recessive
Case number	Sex	Age onset	Age death	Family History	Clinical Dx	Neuropath Dx	Chromosome	Position	Gene	Transcript	Protein Change	1000G MAF (%)	ESP6500 MAF (%)	ExAC MAF (%)	SIFT	PolyPhen2
41	Female		32	N	Control	Appearances consistent with aging	6	161771219	PARK2	c.1310C>T; c.863C>T; c.1226C>T	p.P437L; p.P409L; p.P288L	0.04	0.24	0.15	Damaging	Probably Damaging
42	Male		54	N	MND	FTD-ALS	10	13160910	OPTN	c.649A>T	p.R217*	NS	NS	NS	Stop-gain	Stop-gain
43	Male	55	65	N	MSA	Unclear: Atypical Multisystem degeneration	21	33039603	SOD1	c.272A>C	p.D91A	0.04	0.05	0.11	Tolerated	Benign
44	Male		40	N	Chorea-acanthocytosis	Chorea-acanthocytosis	9	79936191	VPS13A		p.L1841*; p.L1802*	NS	NS	NS	Stop-gain	Stop-gain
							9	79959075	VPS13A		p.W2347fs*36; p.W2308fs*36	NS	NS	NS	Frameshift	Stop-gain
45	Female		69	N	PD	PD	6	161771240	PARK2	c.842G>A; c.1289G>A; c.1205G>A	p.G430D; p.G281D; p.G402D	0	0.02	0.01	Damaging	Probably Damaging
							6	162206852	PARK2	c.823C>T; c.376C>T; c.739C>T	p.R275W; p.R126W; p.R247W	0.04	0.2	0.21	Probably Damaging	Probably Damaging

## Sheet: Likely_pathogenic_heterozygous
Case number	Sex	Age onset	Age death	FH	Clinical Dx	Neuropath Dx	Chromosome	Position	Gene	Transcript	Protein Change	1000G MAF (%)	ESP6500 MAF (%)	ExAC MAF (%)	SIFT	PolyPhen2
30	Male	55	61	N	MND	MND	5	179263549	SQSTM1	c.1027G>A; c.1279G>A	p.A427T; p.A343T	NS	NS	0	Damaging	Probably Damaging
31	Female	81	82	N	Stroke with dementia	Vascular disease / AD	1	227071472	PSEN2	c.208G>T	p.G70W	NS	NS	NS	Damaging	Benign
32	Female		70	N	Dementia	AD	1	227076573	PSEN2	c.610C>A	p.L204I	NS	NS	NS	Tolerated	Benign
33	Female		93	N	AD	AD	1	227071565	PSEN2	c.301G>A	p.V101M	NS	0.01	NS	Damaging	Probably Damaging
34	Female		81	N	AD	AD	1	227083249	PSEN2	c.1313A>C; c.1316A>C	p.D439A; p.D438A	NS	0.02	0	Damaging	Possibly Damaging
35	Male		86	N	Control	High BRAAK (3/4)	1	227083249	PSEN2	c.1313A>C; c.1316A>C	p.D439A; p.D438A	NS	0.02	0	Damaging	Possibly Damaging
36	Female	38	44	Y	AD	AD	14	73640276	PSEN1	c.34aT>A	p.I110N	NS	NS	NS	Damaging	Probably Damaging
37	Male		62	N	MND	MND	12	54677634	HNRNPA1;	c.790G>C; c.946G>C	p.G316R; p.G264R	NS	NS	NS	Tolerated	Probably Damaging
38	Male	65	69	N	Dementia	FTD	17	42429557	GRN	c.1354delG	p.V452fs*39	NS	NS	NS
39	Female	64	71	N	Dementia	FTD	3	87294943	CHMP2B	c.206G>A; c.83G>A	p.R69Q; p.R28Q	NS	0.02	0	Damaging	Probably Damaging
40	Female	71	77	N	AD	AD	21	27264079	APP	c.1773G>T; c.1836G>T;	p.M698I; p.M612I;	NS	NS	NS	Damaging	Possibly Damaging

## Sheet: Pathogenicity_questioned
Case number	Sex	Age onset	Age death	FH	Clinical Dx	Neuropath Dx	Chromosome	Position	Gene	Transcript	Protein Change	1000G MAF (%)	ESP6500 MAF (%)	ExAC MAF (%)	SIFT	PolyPhen2
47	Female	54	58	N	AD	AD	4	90749307	SNCA	c.150T>G	p.H50Q	NS	0	0	Tolerated	Benign
48	Male		65	N	Control	Consistent with aging	4	90749307	SNCA	c.150T>G	p.H50Q	NS	0	0	Tolerated	Benign
49	Male	59	65	N	MND	MND	19	15295168	NOTCH3	c.2504delG	p.C835fs*25	NS	NS	NS
50	Female		100	N	Control	Vascular disease	3	87289899	CHMP2B	c.85A>G; c.4-4965A>G	p.I29V	NS	0.02	0.01	Tolerated	Benign
51	Male		39	N	Control	Consistent with aging	21	33039603	SOD1	c.272A>C	p.D91A	0.04	0.08	0.11	Tolerated	Benign
52	Unknown	15	52	N	MS	MS	21	33039603	SOD1	c.272A>C	p.D91A	0.04	0.08	0.11	Tolerated	Benign
53	Male		87	N	Control	Possible early PD changes	21	33039603	SOD1	c.272A>C	p.D91A	0.04	0.08	0.11	Tolerated	Benign
54	Female	61	75	N	PD	PDD	21	33039603	SOD1	c.272A>C	p.D91A	0.04	0.08	0.11	Tolerated	Benign
55	Female		47	N	MND	MND	4	90650386	SNCA	c.349C>A; c.307-2575C>A	p.P117T	NS	0.01	0		Benign
56	Female	58	65	N	Dementia	FTD	1	227073249	PSEN2	c.367C>A	p.P123T	NS	NS	NS	Damaging	Possibly Damaging
57	Female		55	N	MND	MND	14	73637534	PSEN1	c.105_107delCGA; c.117_119delCGA	p.D40del; p.D36del	NS	NS	NS
58	Male	59	65	N	MND	MND	12	109288126	DAO	c.595C>T	p.R199W	NS	0.06	0.03	Damaging	Probably Damaging
59	Female	87	93	N	Dementia	AD	12	109288126	DAO	c.595C>T	p.R199W	NS	0.06	0.03	Damaging	Probably Damaging
60	Male	58	63	N	PD	PD	12	109288126	DAO	c.595C>T	p.R199W	NS	0.06	0.03	Damaging	Probably Damaging
61	Male	41	41	N	CJD	CJD	14	21161845	ANG; RNASE4	c.122A>T	p.K41I	0.04	0.26	0.14	Tolerated	Benign
62	Male		32	N	Control	Consistent with aging	14	21161845	ANG; RNASE4	c.122A>T	p.K41I	0.04	0.26	0.14	Tolerated	Benign
63	Male		74	N	DLB	DLB	14	21161845	ANG; RNASE4	c.122A>T	p.K41I	0.04	0.26	0.14	Tolerated	Benign
64	Female		88	N	Control	High BRAAK	14	21162130	ANG; RNASE4	c.122A>T	p.P136L	NS	0.01	0	Damaging	Probably Damaging
65	Female		46	N	Control	consistent with aging	16	31202727	FUS	c.1546C>A; c.1549C>A; c.1537C>A	p.H513N; p.H516N; p.H517N	NS	NS	NS	Damaging	Probably Damaging

## Sheet: Uncertain_Significance
Gene	Protein alteration	Chromosome	Position	1000G MAF (%)	ESP6500 MAF (%)	Exac MAF (%)	SIFT	PolyPhen2	ACMG	Cases with variant	Controls with variant		AD	CBD	CJD	DLB	FTD-ALS	HD	MSA	Other	PD	PSP	VD	VD/AD	VD/control		Control	Control (High Braak)	Young control
PSEN2	p.L192I	1	227076537	NS	NS	NS	D	B	Uncertain Significance	2	0					1												1
PSEN2	p.R435Q	1	227083237	NS	0.01	0	T	B	Uncertain Significance	1	0																		1
DCTN1	p.E895D	2	74593386	NS	NS	NS	T	B	Uncertain Significance	1	0																		1
DCTN1	p.T502M	2	74596485	NS	NS	NS	T	B	Uncertain Significance	1	0						1
DCTN1	p.T138I; p.T11I; p.T145I	2	74600074	NS	NS	NS	T	B	Uncertain Significance	1	0						1
HTRA2	p.L43V	2	74756550	NS	NS	NS	T	B	Uncertain Significance	1	0										1
HTRA2	p.S15W	2	74756713	NS	NS	0.02	T	PrD	Uncertain Significance	1	0										1
GIGYF2	p.Q922P	2	233697739	0	0	NS	T	PrD	Uncertain Significance	1	0					1
CHMP2B	p.S153L	3	87302911	NS	0.02	0	T	B	Uncertain Significance	1	0						1
EIF4G1	p.R945Q	3	184043401	NS	NS	NS	T	B	Uncertain Significance	1	0					1
EIF4G1	p.P1075L	3	184044687	NS	NS	NS	T	B	Uncertain Significance	1	0					1
EIF4G1	p.M1356T	3	184046529	NS	0.08	0.04	D	PrD	Uncertain Significance	1	1										1						1
MATR3	p.D187E	5	138643665	NS	0.01	0	T	PoD	Uncertain Significance	1	0																		1
MATR3	p.A745V	5	138661214	NS	NS	0	T	B	Uncertain Significance	1	0						1
SQSTM1	p.P29S	5	179248021	NS	NS	0.02		B	Uncertain Significance	1	0						1
SQSTM1	p.R55C	5	179250971	NS	NS	0	D	PrD	Uncertain Significance	1	0						1
SQSTM1	p.R161W	5	179251037	NS	NS	0	D	PoD	Uncertain Significance	1	0																		1
SQSTM1	p.R209C	5	179251275	NS	NS	NS	D	B	Uncertain Significance	1	0						1
SQSTM1	p.P228L	5	179252155	NS	0.05	0.01	D	B	Uncertain Significance	1	0						1
C9orf72	p.D419N	9	27548559	NS	NS	NS	D	B	Uncertain Significance	1	0																		1
C9orf72	p.I413M	9	27548575	NS	NS	0	D	B	Uncertain Significance	1	0						1
C9orf72	p.D347Y	9	27556611	NS	NS	NS		B	Uncertain Significance	1	0						1
C9orf72	p.N207del	9	27561627	NS	NS	0			Uncertain Significance	1	0						1
C9orf72	p.I17M	9	27567068	NS	NS	NS		PoD	Uncertain Significance	1	0						1
VCP	p.R113S	9	35066780	NS	NS	NS		PoD	Uncertain Significance	1	0																		1
DAO	p.R2H	12	109278787	0	0.02	0.01	D	B	Uncertain Significance	1	0						1
DAO	p.F90V	12	109281299	NS	0.03	0.03	T	PoD	Uncertain Significance	1	0						1
DAO	p.P103L	12	109281339	0.06	0	0.04	T	PoD	Uncertain Significance	1	1						1										1
DAO	p.R274G	12	109293159	NS	NS	NS	T	B	Uncertain Significance	1	0						1
PSEN1	p.R27R	14	73614808	NS	NS	NS			Uncertain Significance	1	0																		1
FUS	p.P18S	16	31193847	NS	0.02	0		B	Uncertain Significance	1	0						1
FUS	p.S135N; p.S134N	16	31195598	0.2	0.01	0.03	T	B	Uncertain Significance	1	0						1
FUS	Splice-site alteration	16	31195718	NS	NS	NS			Uncertain Significance	1	0						1
VPS35	p.N384S	16	46708235	NS	NS	0	T	B	Uncertain Significance	1	0																		1
PFN1	p.E117G	17	4849267	NS	NS	NS	D	B	Uncertain Significance	5	0		1		1		1			1									1
GRN	p.V8M	17	42426554	NS	NS	0	T	B	Uncertain Significance	1	0											1
GRN	Splice site alteration	17	42428169	NS	0.01	0			Uncertain Significance	1	0		1
GRN	p.R298H	17	42428788	NS	NS	0.01	T	PrD	Uncertain Significance	1	0																		1
MAPT	p.A2S	17	44039707	NS	NS	NS		B	Uncertain Significance	1	0																	1
MAPT	p.P184L	17	44073846	NS	NS	NS	D	PrD	Uncertain Significance	1	0		1
PRNP	p.D167G	20	4680366	NS	NS	NS	D	PoD	Uncertain Significance	1	0				1
APP	p.V173F	21	27423356	NS	NS	NS	T	PrD	Uncertain Significance	1	0																	1
APP	p.V97I	21	27425563	NS	NS	0	T	B	Uncertain Significance	1	0		1
CHCHD10	p.A13T	22	24110025	NS	NS	NS	T	B	Uncertain Significance	1	0						1
UBQLN2	p.S222G	X	56590970	NS	NS	NS	T	B	Uncertain Significance	1	0											1

## Sheet: Likely_Benign
Gene	Protein alteration	Chromosome	Position	1000G MAF (%)	ESP6500 MAF (%)	Exac MAF (%)	SIFT	PolyPhen2	ACMG	Cases with variant	Controls with variant		AD	CBD	CJD	DLB	FTD-ALS	HD	MSA	Other	PD	PSP	VD	VD/AD	VD/control		Control	Control (High Braak)	Young control			Cases with variant	SUM cases		Controls with variant	Sum controls
PSEN2	p.S30F	1	227069697	NS	NS	0	D	B	Likley Benign	1	0				1																	1	1		0
PSEN2	p.G37V	1	227069718	NS	NS	NS	T	B	Likley Benign	1	2			1													2					1	1		2
PSEN2	p.R62C	1	227071448	NS	0.01	0.02	T	PoD	Likley Benign	2	0						2															2	2		0
PSEN2	p.V64F	1	227071454	NS	NS	NS	T	B	Likley Benign	1	0																		1			1	1		0
PSEN2	p.C65F	1	227071458	NS	NS	NS	D	B	Likley Benign	1	0										1											1	1		0
PSEN2	p.R110H	1	227071593	NS	NS	0	D	B	Likley Benign	1	0												1									1	1		0
PSEN2	p.S130L	1	227073271	0.1	0.1	0.06	D	PoD	Likley Benign	5	1		2		2						1						1					5	5		1
DCTN1	p.V1065I	2	74589791	0.06	NS	0.02	T	B	Likley Benign	1	0		1																			1	1		0
DCTN1	p.V1074M	2	74590525	NS	NS	0	T	B	Likley Benign	2	0						1			1												2	2		0
DCTN1	p.E1067*	2	74590753	NS	0.01	0			Likley Benign	1	0		1																			1	1		0
DCTN1	p.R1029Q	2	74592252	0.04	0.23	0.1	T	PoD	Likley Benign	9	2		3		2		1			1			2				2					9	9		2
DCTN1	p.E1026G	2	74592261	NS	0.02	0.01	T	B	Likley Benign	1	0				1																	1	1		0
DCTN1	p.K851R	2	74592717	NS	NS	0	T	B	Likley Benign	2	0				1													1				2	2		0
DCTN1	p.A803G	2	74593947	NS	0.01	NS	T	B	Likley Benign	1	0											1										1	1		0
DCTN1	p.R778W	2	74594023	NS	0.08	0.02	D	PoD	Likley Benign	1	1		1														1					1	1		1
DCTN1	p.V697L	2	74594858	NS	NS	NS	T	B	Likley Benign	1	0		1																			1	1		0
DCTN1	p.S661F	2	74594914	NS	NS	NS	D	B	Likley Benign	1	0									1												1	1		0
DCTN1	p.A653V	2	74595155	NS	NS	NS	T	B	Likley Benign	1	0		1																			1	1		0
DCTN1	p.K617N	2	74595241	NS	NS	NS	T	B	Likley Benign	1	0					1																1	1		0
DCTN1	p.V599I	2	74595893	NS	0	0		B	Likley Benign	1	0														1							1	1		0
DCTN1	p.P512S	2	74596281	NS	NS	NS	T	B	Likley Benign	1	0		1																			1	1		0
DCTN1	p.R465C	2	74596507	NS	NS	0	D	PoD	Likley Benign	0	1																1					0	0		1
DCTN1	p.A354T	2	74597660	NS	NS	NS	D	B	Likley Benign	1	0		1																			1	1		0
DCTN1	p.R218Q	2	74598236	NS	NS	NS	D	PrD	Likley Benign	1	0		1																			1	1		0
HTRA2	p.R173H	2	74755884	NS	NS	NS	T	B	Likley Benign	1	0						1															1	1		0
HTRA2	p.P120S	2	74756044	NS	NS	NS	D	PoD	Likley Benign	1	0		1																			1	1		0
HTRA2	p.N106H	2	74756282	NS	NS	0	D	PrD	Likley Benign	1	0																	1				1	1		0
HTRA2	p.V60L	2	74756499	0.04	0.13	0.13	T	B	Likley Benign	2	2				1					1							2					2	2		2
HTRA2	p.A32S	2	74756583	NS	0.01	0	T	B	Likley Benign	1	0		1																			1	1		0
HTRA2	p.L72P	2	74757348	0.16	0.3	0.27	D	B	Likley Benign	2	1		1		1												1					2	2		1
HTRA2	p.T76N	2	74757360	NS	NS	NS	T	B	Likley Benign	0	1																1					0	0		1
HTRA2	p.N98S	2	74757426	NS	NS	NS	T	B	Likley Benign	1	0				1																	1	1		0
GIGYF2	p.R168C	2	233626116	NS	NS	0	D	B	Likley Benign	1	0																	1				1	1		0
GIGYF2	p.G208A	2	233651884	NS	NS	0	T	B	Likley Benign	1	0			1																		1	1		0
GIGYF2	p.I228M	2	233651945	NS	NS	NS	D	PoD	Likley Benign	1	0						1															1	1		0
GIGYF2	p.G239V	2	233655411	NS	NS	NS	D	PoD	Likley Benign	1	0		1																			1	1		0
GIGYF2	p.D257E	2	233655484	NS	NS	NS		B	Likley Benign	1	0		1																			1	1		0
GIGYF2	p.D371E	2	233655834	NS	0.13	0.05	T	B	Likley Benign	1	1												1				1					1	1		1
GIGYF2	p.S396P	2	233655997	NS	0	NS	T	B	Likley Benign	1	0				1																	1	1		0
GIGYF2	p.Q439H	2	233659492	NS	0.02	0.01	T	PoD	Likley Benign	2	0						1			1												2	2		0
GIGYF2	p.N451T	2	233659545	0.02	0.14	0.04	T	B	Likley Benign	1	0				1																	1	1		0
GIGYF2	p.T702K	2	233677199	NS	NS	NS	D	B	Likley Benign	1	0		1																			1	1		0
GIGYF2	p.R816C	2	233684549	NS	NS	0	D	PoD	Likley Benign	1	0												1									1	1		0
GIGYF2	p.R852Q	2	233697592	NS	0.01	0.04	T	B	Likley Benign	1	0						1															1	1		0
GIGYF2	p.R912Q	2	233697709	NS	0.01	0	T	B	Likley Benign	0	1																1					0	0		1
GIGYF2	p.R982Q;	2	233704674	0.06	0.14	0.06	T	B	Likley Benign	1	0						1															1	1		0
GIGYF2	p.S1056C	2	233709083	NS	0.19	0.08	T	PoD	Likley Benign	4	0		1		1		2															4	4		0
GIGYF2	p.E1169D	2	233712104	NS	NS	NS	T	PrD	Likley Benign	1	0		1																			1	1		0
GIGYF2	p.H1171R	2	233712109	0.08	0.22	0.16	T	PrD	Likley Benign	4	0		3							1												4	4		0
GIGYF2	p.K1210M	2	233712163	NS	NS	NS	D	PrD	Likley Benign	1	0																	1				1	1		0
GIGYF2	p.L1230P	2	233712223	NS	NS	0.02	T	B	Likley Benign	54	6		17	2	6	2	11			6	1		3		1		6		5			54	54		6
GIGYF2	p.Q1207P	2	233712235	NS	NS	NS	T	B	Likley Benign	3	2						1						1		1		2					3	3		2
GIGYF2	p.Q1223_Q1226del	2	233712264	NS	NS	NS			Likley Benign	28	1		8		5	2	6			1			2	2			1	1	1			28	28		1
CHMP2B	p.R19Q	3	87289870	0.02	NS	0.01	D	B	Likley Benign	1	0														1							1	1		0
CHMP2B	p.R32Q	3	87289909	NS	0.01	0	D	B	Likley Benign	1	0				1																	1	1		0
CHMP2B	p.A33V	3	87289912	NS	NS	NS	T	B	Likley Benign	1	0																	1				1	1		0
EIF4G1	Splice-site alteration (1)	3	184033272	NS	NS	NS			Likley Benign	1	0		1																			1	1		0
EIF4G1	p.A63D	3	184035149	NS	NS	NS	T	PrD	Likley Benign	1	0								1													1	1		0
EIF4G1	Splice-site alteration (2)	3	184038412	NS	0.01	0			Likley Benign	0	1																1					0	0		1
EIF4G1	p.P100L	3	184039163	NS	NS	0	T	PrD	Likley Benign	1	0						1															1	1		0
EIF4G1	p.I293T	3	184039250	NS	NS	NS		B	Likley Benign	1	0							1														1	1		0
EIF4G1	p.A265S	3	184039426	NS	0.02	0.01	T	B	Likley Benign	1	0									1												1	1		0
EIF4G1	p.G276_A278del	3	184039785	NS	NS	NS			Likley Benign	67	10		15		7	7	11	1		4	2		3	1	3		10	1	12			67	67		10
EIF4G1	p.P399S	3	184039828	0.02	0.06	0.08		B	Likley Benign	4	0		1		1	1	1															4	4		0
EIF4G1	p.P539L	3	184040339	0.04	NS	0.01	T	B	Likley Benign	0	1																1					0	0		1
EIF4G1	p.A510P	3	184040371	0.12	0.19	0.1	T	B	Likley Benign	1	1												1				1					1	1		1
EIF4G1	p.S489L	3	184040450	NS	NS	NS	T	B	Likley Benign	1	0				1																	1	1		0
EIF4G1	p.G490C	3	184040997	NS	NS	0.01	T	PoD	Likley Benign	2	0				2																	2	2		0
EIF4G1	p.P703T	3	184041027	NS	NS	NS	T	B	Likley Benign	1	0				1																	1	1		0
EIF4G1	p.G534A	3	184041200	NS	0.01	0	T	PoD	Likley Benign	2	0		1		1																	2	2		0
EIF4G1	p.A553P	3	184041256	NS	0.15	0.07	T	B	Likley Benign	1	1										1						1					1	1		1
EIF4G1	p.I642V	3	184041709	0.02	0.05	0.04	D	B	Likley Benign	2	1									1							1		1			2	2		1
EIF4G1	p.T634S	3	184042001	NS	0.02	0	T	B	Likley Benign	1	0												1									1	1		0
EIF4G1	p.E936*	3	184042831	NS	NS	NS			Likley Benign	1	0		1																			1	1		0
EIF4G1	p.R1074C	3	184044683	NS	0	0	D	PrD	Likley Benign	1	0									1												1	1		0
EIF4G1	p.R1099C	3	184044758	NS	NS	0.01	D	PrD	Likley Benign	2	0		1				1															2	2		0
EIF4G1	p.L1312V	3	184045750	NS	NS	0	T	B	Likley Benign	1	0		1																			1	1		0
EIF4G1	p.M1336V	3	184046450	0.1	0.02	0.02	D	PoD	Likley Benign	2	0					1	1															2	2		0
EIF4G1	p.I1493V	3	184049594	NS	NS	NS	T	B	Likley Benign	1	0									1												1	1		0
EIF4G1	Splice-site alteration (3)	3	184052513	0	0	0			Likley Benign	1	0						1															1	1		0
EIF4G1	p.A1549S	3	184052538	NS	NS	NS	D	PoD	Likley Benign	1	0				1																	1	1		0
COQ2	p.N417S	4	84185368	NS	NS	0.01			Likley Benign	0	1																1					0	0		1
COQ2	p.Y353C	4	84188782	NS	NS	0			Likley Benign	0	1																1					0	0		1
COQ2	p.A201T	4	84194740	NS	0	0			Likley Benign	1	0						1															1	1		0
COQ2	p.R197H	4	84194751	NS	NS	0			Likley Benign	1	0				1																	1	1		0
COQ2	p.S107T	4	84205748	0.02	NS	0.12	T		Likley Benign	2	1		1										1				1					2	2		1
COQ2	p.Q105H	4	84205753	NS	NS	0.05	T		Likley Benign	0	1																1					0	0		1
COQ2	p.P96S	4	84205782	NS	NS	0	T		Likley Benign	3	1		1		1						1						1					3	3		1
COQ2	p.S54W	4	84205907	NS	0.01	0.14			Likley Benign	1	0				1																	1	1		0
COQ2	p.G53R	4	84205911	NS	NS	NS			Likley Benign	1	0						1															1	1		0
MATR3	p.Y214C	5	138643745	NS	NS	NS	D	PrD	Likley Benign	0	1																1					0	0		1
MATR3	p.E262*	5	138643888	NS	NS	NS			Likley Benign	1	0		1																			1	1		0
MATR3	p.V159M	5	138655077	NS	NS	NS	T	PrD	Likley Benign	1	0				1																	1	1		0
MATR3	p.A762T	5	138661264	NS	0.06	0.02	T	B	Likley Benign	1	0		1																			1	1		0
MATR3	p.R503C	5	138665061	NS	NS	0.01	D	B	Likley Benign	3	1		1		1		1										1					3	3		1
SQSTM1	p.S24G	5	179248006	NS	NS	NS	D	B	Likley Benign	0	1																1					0	0		1
SQSTM1	p.A33V	5	179248034	NS	0.08	0.12		B	Likley Benign	2	2		1														2		1			2	2		2
SQSTM1	p.P111L	5	179250888	NS	0.01	0	T	B	Likley Benign	1	0					1																1	1		0
SQSTM1	p.A33V	5	179250906	0.08	0.12	0.15	T	B	Likley Benign	2	1				1								1				1					2	2		1
SQSTM1	p.P118S	5	179250908	NS	0.01	0.02	D	B	Likley Benign	4	0				2		1												1			4	4		0
SQSTM1	p.P50L	5	179250957	NS	0.01	0	D	B	Likley Benign	1	0		1																			1	1		0
SQSTM1	p.V150G	5	179252173	NS	NS	NS	D	PrD	Likley Benign	1	0		1																			1	1		0
SQSTM1	p.K238E	5	179252184	0.24	0.35	0.24	D	B	Likley Benign	17	1		4		1		7					2	1				1	1	1			17	17		1
SQSTM1	p.G168V	5	179260032	0	0	NS	D	PoD	Likley Benign	0	1																					0	0		1
SQSTM1	p.P392L	5	179263445	0.24	0.21	0.09	T	B	Likley Benign	9	0		1				4						1					1	2			9	9		0
HNRNPA2B1	p.G323del	7	26232906	NS	NS	NS			Likley Benign	1	0		1																			1	1		0
C9orf72	p.M332V	9	27556656	NS	0	0	D	B	Likley Benign	2	1									1							1		1			2	2		1
C9orf72	p.M318V	9	27556698	NS	NS	0	T	B	Likley Benign	1	0												1									1	1		0
C9orf72	p.I138V	9	27566707	NS	NS	NS	T	B	Likley Benign	1	0									1												1	1		0
C9orf72	p.T49R	9	27566973	0.02	0.02	0.02	T	B	Likley Benign	3	0		1			1	1															3	3		0
VCP	p.N616fs*12	9	35059655	NS	NS	NS			Likley Benign	27	4		9		4	1	2			2	1	1	2	2	1		4	2				27	27		4
VCP	p.N616fs*63	9	35059655	NS	NS	NS			Likley Benign	3	0				3																	3	3		0
VCP	p.D501E	9	35060502	NS	NS	NS		B	Likley Benign	1	0		1																			1	1		0
VCP	p.R453Q	9	35061013	NS	NS	NS		B	Likley Benign	0	2																2					0	0		2
VCP	p.R323L	9	35062113	NS	NS	NS		PoD	Likley Benign	1	0																		1			1	1		0
VCP	p.I27V	9	35068298	0.1	0.03	0.05		B	Likley Benign	1	0				1																	1	1		0
VCP	p.G9V	9	35068351	NS	NS	NS		B	Likley Benign	1	0				1																	1	1		0
HNRNPA1	p.F216L	12	54676421	NS	NS	NS	T	B	Likley Benign	1	0		1																			1	1		0
DAO	p.R2S	12	109278786	NS	NS	NS	D	B	Likley Benign	1	1																1					1	0		1
DAO	p.A8E	12	109278805	NS	NS	NS	D	PrD	Likley Benign	1	0														1							1	1		0
DAO	p.Q63E	12	109278969	NS	0.02	0.01	T	B	Likley Benign	1	1				1												1					1	1		1
DAO	p.P103P	12	109281340	NS	0.02	0.01			Likley Benign	1	0				1																	1	1		0
DAO	p.R115W	12	109283278	NS	0.01	0.01	D	PrD	Likley Benign	1	0											1										1	1		0
DAO	p.Y144H	12	109284027	0.3	0	0.08	D	PrD	Likley Benign	2	0		1				1															2	2		0
DAO	p.W260*	12	109292538	NS	NS	NS			Likley Benign	1	0										1											1	1		0
ANG	p.G17V	14	21161773	NS	NS	NS	T	B	Likley Benign	1	0												1									1	1		0
ANG	p.I70V	14	21161931	0.02	0.06	0.06	T	B	Likley Benign	2	1		1				1										1					2	2		1
ANG	p.K78E	14	21161955	NS	0.01	0.02	T	B	Likley Benign	0	1																1					0	0		1
ANG	p.N83K	14	21161972	NS	NS	NS	T	B	Likley Benign	1	0					1																1	1		0
FUS	p.S57del	16	31193964	NS	NS	NS			Likley Benign	3	0				1								1						1			3	3		0
FUS	p.R379H; p.R382H; p.R383H	16	31201442	NS	NS	0	T	B	Likley Benign	1	0				1																	1	1		0
FUS	p.R483H; p.R486H; p.R487H	16	31202350	0.02	NS	0	T	B	Likley Benign	0	1																1					0	0		1
VPS35	p.V476A	16	46705714	NS	0.01	0	T	B	Likley Benign	1	0		1																			1	1		0
VPS35	p.K296E	16	46710523	NS	NS	NS	D	PrD	Likley Benign	1	0						1															1	1		0
VPS35	p.M57L	16	46716021	NS	NS	0	T	B	Likley Benign	1	0		1																			1	1		0
VPS35	p.M30K	16	46717433	NS	0	0.01	D	PoD	Likley Benign	1	0		1																			1	1		0
PFN1	p.V103F	17	4849941	NS	NS	NS	D	PrD	Likley Benign	1	0									1
PFN1	Splice site alteration	17	4850116	NS	NS	NS			Likley Benign	1	0				1																	1	1		0
PFN1	p.P29L	17	4851604	NS	NS	NS	D	PoD	Likley Benign	1	0				1
GRN	p.T18M	17	42426585	0.02	0.02	0	D	PoD	Likley Benign	2	0					1													1			2	2		0
GRN	p.P50T	17	42426803	NS	NS	NS	D	B	Likley Benign	1	0					1																1	1		0
GRN	p.M286T	17	42428752	NS	NS	NS	T	B	Likley Benign	1	0												1									1	1		0
GRN	p.E287D	17	42428756	NS	0.01	0	T	PoD	Likley Benign	1	0					1																1	1		0
GRN	p.C404F	17	42429414	NS	NS	NS	D	PrD	Likley Benign	1	0						1															1	1		0
GRN	p.R418Q	17	42429456	NS	0.02	0.02	T	B	Likley Benign	2	0				1								1									2	2		0
GRN	p.V514M	17	42429835	NS	0.05	0	T	B	Likley Benign	2	0				2																	2	2		0
GRN	p.A588S	17	42430146	NS	NS	0.05	D	B	Likley Benign	30	7		11	1		1	11		2	3							7	1				30	30		7
MAPT	p.S501I	17	44068947	NS	NS	NS	T	B	Likley Benign	0	1																1					0	0		1
MAPT	p.A210T	17	44073923	0.02	0.14	0.08	T	B	Likley Benign	4	2		2	1			1										2					4	4		2
NOTCH3	p.T2270M	19	15271630	NS	0	0.01	T	PoD	Likley Benign	1	0												1									1	1		0
NOTCH3	p.P2222L	19	15271774	NS	NS	NS	T	B	Likley Benign	1	0		1																			1	1		0
NOTCH3	p.P2209L	19	15271813	0.04	NS	0.07	T	B	Likley Benign	1	0																		1			1	1		0
NOTCH3	p.A2190V	19	15271870	0.02	NS	0.02	T	B	Likley Benign	1	0																		1			1	1		0
NOTCH3	p.R2150S	19	15271991	NS	NS	NS	T	B	Likley Benign	1	0						1															1	1		0
NOTCH3	p.P2115L	19	15272095	NS	NS	NS	T	B	Likley Benign	1	0						1															1	1		0
NOTCH3	p.V2021M	19	15272378	0.04	NS	0.02	D	PrD	Likley Benign	2	0				2																	2	2		0
NOTCH3	p.A1947V	19	15273349	NS	NS	0.01	D	PrD	Likley Benign	0	1																1					0	0		1
NOTCH3	p.V1762M	19	15278138	NS	NS	0.02	T	B	Likley Benign	1	0				1																	1	1		0
NOTCH3	p.S1420R	19	15288479	NS	NS	NS		B	Likley Benign	1	0										1											1	1		0
NOTCH3	p.P1408S	19	15288517	NS	NS	NS		B	Likley Benign	0	1																1					0	0		1
NOTCH3	p.C1405F	19	15288525	NS	NS	NS	D	PrD	Likley Benign	0	1																1					0	0		1
NOTCH3	p.E1404D	19	15288527	NS	NS	NS		B	Likley Benign	0	1																1					0	0		1
NOTCH3	p.D1398Y	19	15288547	NS	NS	NS		PrD	Likley Benign	1	0										1											1	1		0
NOTCH3	p.R1285P	19	15288885	NS	NS	NS	T	B	Likley Benign	1	0						1															1	1		0
NOTCH3	p.G1269V	19	15289665	NS	NS	0	T	B	Likley Benign	1	0								1													1	1		0
NOTCH3	p.Q1253P	19	15289713	NS	NS	0.01		PoD	Likley Benign	1	0						1															1	1		0
NOTCH3	p.R1242H	19	15289746	0.04	0.02	0		B	Likley Benign	0	1																1					0	0		1
NOTCH3	p.C1222G	19	15289890	NS	0.05	0.01		PrD	Likley Benign	1	0					1																1	1		0
NOTCH3	p.A1213D	19	15289916	NS	NS	NS		B	Likley Benign	1	0				1																	1	1		0
NOTCH3	p.M1107I	19	15290889	0.02	NS	0		B	Likley Benign	1	0		1																			1	1		0
NOTCH3	p.C997*	19	15291775	NS	NS	NS		#N/A	Likley Benign	1	0										1											1	1		0
NOTCH3	p.S991R	19	15291793	NS	NS	NS		B	Likley Benign	2	0									1									1			2	2		0
NOTCH3	p.H981Y	19	15291825	NS	NS	0		B	Likley Benign	1	0																		1			1	1		0
NOTCH3	p.S947R	19	15291925	NS	NS	NS		PoD	Likley Benign	1	0				1																	1	1		0
NOTCH3	p.P913L	19	15292441	NS	0.01	0		B	Likley Benign	1	0						1															1	1		0
NOTCH3	p.S893N	19	15292501	NS	NS	NS		PoD	Likley Benign	1	0																		1			1	1		0
NOTCH3	p.G878R	19	15292547	NS	NS	NS		PrD	Likley Benign	0	1																1					0	0		1
NOTCH3	p.G869A	19	15292573	NS	NS	0		PoD	Likley Benign	1	0		1																			1	1		0
NOTCH3	p.A815D	19	15295228	NS	NS	NS	D	B	Likley Benign	1	0		1																			1	1		0
NOTCH3	p.P761L	19	15296082	NS	0	0	T	B	Likley Benign	0	1																1					0	0		1
NOTCH3	p.V644D	19	15297709	0.02	0.09	0.07	T	PrD	Likley Benign	3	1				2	1											1					3	3		1
NOTCH3	p.R544H	19	15298125	NS	NS	0	T	B	Likley Benign	1	1						1										1					1	1		1
NOTCH3	p.A534S	19	15298698	NS	NS	NS	T	PrD	Likley Benign	1	1														1		1					1	1		1
NOTCH3	p.R532L	19	15298703	NS	NS	NS	T	B	Likley Benign	1	0				1																	1	1		0
NOTCH3	p.G490A	19	15299069	NS	0.01	0	T	PoD	Likley Benign	1	0					1																1	1		0
NOTCH3	p.P426L	19	15299901	NS	NS	0	D	PrD	Likley Benign	1	0				1																	1	1		0
NOTCH3	p.E403D	19	15299969	NS	NS	NS	D	PrD	Likley Benign	1	0								1													1	1		0
NOTCH3	p.L295R	19	15302387	0.02	0.07	0.02	T	B	Likley Benign	2	0				1													1				2	2		0
NOTCH3	p.G248A	19	15302615	0.02	NS	0.01	D	PrD	Likley Benign	1	0																		1			1	1		0
NOTCH3	p.H170R	19	15302941	0.14	0.15	0.19	D	PoD	Likley Benign	7	3			1	1		3			1							3		1			7	7		3
NOTCH3	p.R169H	19	15302944	NS	NS	0	T	B	Likley Benign	1	0												1									1	1		0
NOTCH3	p.R113Q	19	15303190	NS	0.07	0.08	T	B	Likley Benign	1	1				1												1					1	1		1
NOTCH3	p.A102V	19	15303223	NS	NS	NS	T	B	Likley Benign	1	0																		1			1	1		0
NOTCH3	p.V97A	19	15303238	NS	NS	NS	T	B	Likley Benign	1	0									1												1	1		0
NOTCH3	p.S95R	19	15303245	NS	NS	0	T	PrD	Likley Benign	0	1																1					0	0		1
PRNP	p.R48H	20	4680009	NS	NS	NS	D	PoD	Likley Benign	1	0		1																			1	1		0
PRNP	p.G54S	20	4680026	NS	NS	0.07	T	B	Likley Benign	0	1																1					0	0		1
PRNP	p.W26L	20	4680032	NS	NS	NS	D	PoD	Likley Benign	1	0		1																			1	1		0
PRNP	p.R164M	20	4680357	NS	NS	NS	D	PrD	Likley Benign	1	0						1															1	1		0
PRNP	p.K194R	20	4680447	NS	NS	NS	T	PrD	Likley Benign	0	1																1					0	0		1
VAPB	p.S160del	20	57016044	NS	NS	NS			Likley Benign	11	0		3		1	1	3			1		1	1									11	11		0
VAPB	p.M170I	20	57016076	0.1	0.16	0.14	T	B	Likley Benign	5	1		3				2										1					5	5		1
VAPB	p.F231L	20	57019250	NS	NS	NS		PrD	Likley Benign	0	1																					0	0		1
APP	p.I665V	21	27264141	NS	NS	0	T	B	Likley Benign	1	1									1							1					1	1		1
APP	p.T553M	21	27269961	NS	NS	0	T	B	Likley Benign	0	1																1					0	0		1
APP	p.T525M	21	27284163	NS	NS	0.01	T	PrD	Likley Benign	0	1																1					0	0		1
APP	p.E489K	21	27284167	0.06	0.1	0.13	T	PoD	Likley Benign	1	0						1															1	1		0
APP	p.C285F;	21	27372341	NS	NS	NS	T	PrD	Likley Benign	1	0												1									1	1		0
APP	p.M338V	21	27372351	0	0.01	0	T	B	Likley Benign	1	0								1													1	1		0
APP	p.R328W	21	27372381	NS	NS	0.02	D	PrD	Likley Benign	1	0				1																	1	1		0
APP	p.R250L	21	27372446	0	0.01	0	D	PrD	Likley Benign	1	0						1															1	1		0
APP	p.A295S	21	27372480	NS	NS	NS	T	PrD	Likley Benign	1	0						1															1	1		0
APP	p.S198P	21	27423386	NS	0.07	0.05	T	PoD	Likley Benign	0	1																1					0	0		1
SOD1	p.Q16R	21	33032129	NS	NS	NS	T	B	Likley Benign	1	0												1									1	1		0
CHCHD10	p.Y135H	22	24108321	NS	0.08	0.03	T	B	Likley Benign	2	0				1						1											2	2		0
CHCHD10	p.P80L	22	24109583	NS	NS	0.03	T	B	Likley Benign	1	0				1																	1	1		0
CHCHD10	p.M48K	22	24109679	NS	NS	NS	D	PrD	Likley Benign	0	1																1					0	0		1
CHCHD10	p.P34S	22	24109722	0.04	NS	0.11	T	B	Likley Benign	12	2		3				5					1	2				2		1			12	12		2
UBQLN2	p.A28P	X	56590388	NS	NS	NS	T	B	Likley Benign	1	0									1												1	1		0
UBQLN2	p.S140R	X	56590726	NS	NS	NS	T	B	Likley Benign	1	0							1														1	1		0
UBQLN2	p.S301P	X	56591207	NS	NS	NS	T	PoD	Likley Benign	1	0		1																			1	1		0
UBQLN2	p.M563I	X	56591995	NS	NS	NS	T	PoD	Likley Benign	1	0					1																1	1		0

## Sheet: Benign
Gene	Protein alteration	Chromosome	Position	1000G MAF (%)	ESP6500 MAF (%)	Exac MAF (%)	SIFT	PolyPhen2	ACMG	Cases with variant	Controls with variant		AD	CBD	CJD	DLB	FTD-ALS	HD	MSA	Other	PD	PSP	VD	VD/AD	VD/control		Control	Control (High Braak)	Young control
PSEN2	p.R71W	1	227071475	0.14	0.37	0.34	D	B	Benign	8	3		2		2					1			1				3		2		8
DCTN1	p.T1224I	2	74588717	0.1	0.45	0.3	T	B	Benign	18	4		6	1	3	2	1	1		1		1					4		2		18
GIGYF2	p.L1230Q;	2	233712223	NS	NS	0	T	B	Benign	38	5		9		11	3	8				2	1	2				5		2		38
GRN	p.A324T	17	42428954	0.1	0.14	0.08	T	B	Benign	4	1					2				1				1			1				4
GRN	p.R433W	17	42429500	0.16	0.28	0.43	D	B	Benign	11	1		5		2		1			1	1	1					1				11
MAPT	p.S427F	17	44067341	0.1	0.21	0.15	D	PrD	Benign	3	0				1		1												1		3
VAPB	p.D130E	20	57014075	0.1	0.1	0.14	T	B	Benign	1	0								1												1
