# Supplementary material for: Genetic compendium of 1511 human brains available through the UK Medical Research Council Brain Banks Network Resource
Source: HighWire-hosted journal article supplement (doi:10.1101/gr.210609.116), 2016-12-21
Supplement: Supplemental_Figure_S1.docx [file Supplemental_Figure_S1.docx]

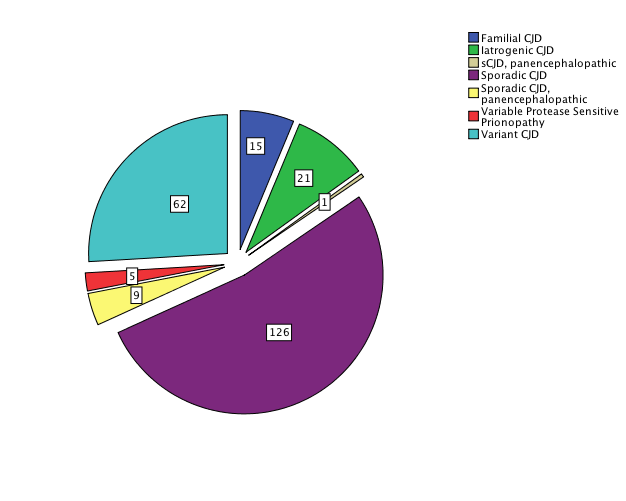


**Supplemental Figure S1.** Stratification of CJD cases within the cohort. Numbers identify the number of cases of each sub-type of CJD.
