# Supplementary material for: Genetic compendium of 1511 human brains available through the UK Medical Research Council Brain Banks Network Resource
Source: HighWire-hosted journal article supplement (doi:10.1101/gr.210609.116), 2016-12-21
Supplement: Supplemental_Figure_S2.docx [file Supplemental_Figure_S2.docx]

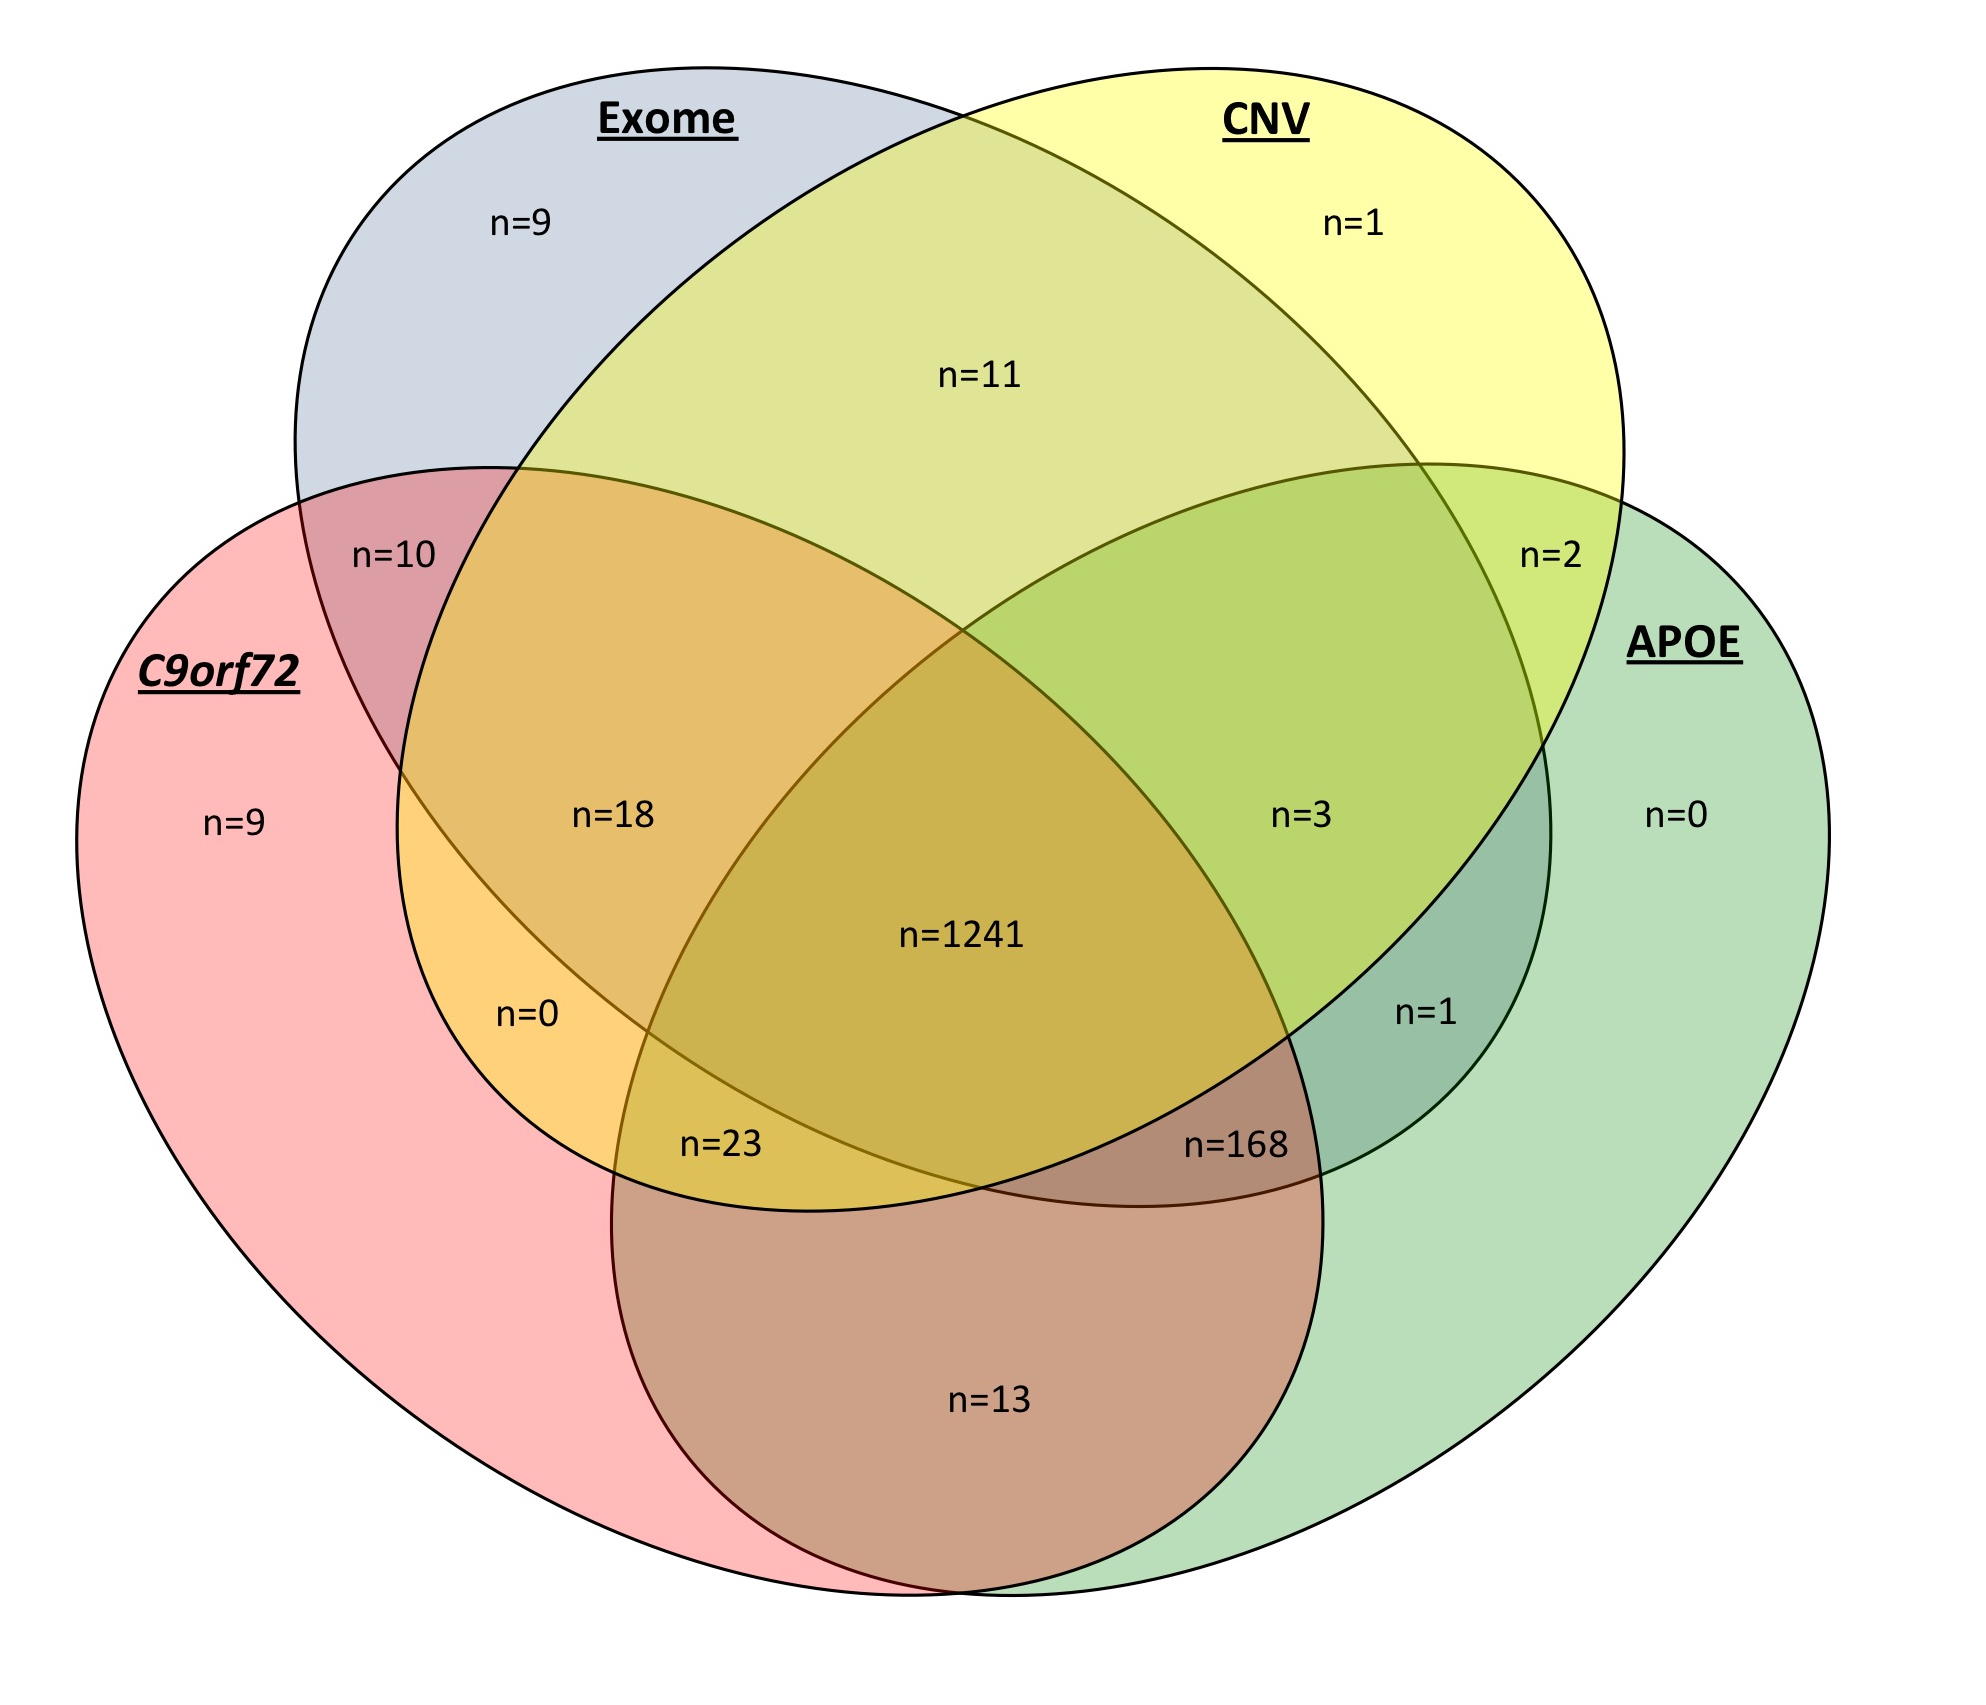


**Supplemental Figure 2.** A Venn diagram of all sequencing modalities utilized in this study (total case cohort n=1511). Overlapping ovals represent the number of samples covered by each of those modalities. In total, 1241 samples were sequenced on all 4 platforms.
