# Supplementary material for: Genetic compendium of 1511 human brains available through the UK Medical Research Council Brain Banks Network Resource
Source: HighWire-hosted journal article supplement (doi:10.1101/gr.210609.116), 2016-12-21
Supplement: Supplemental_Figure_S3.docx [file Supplemental_Figure_S3.docx]

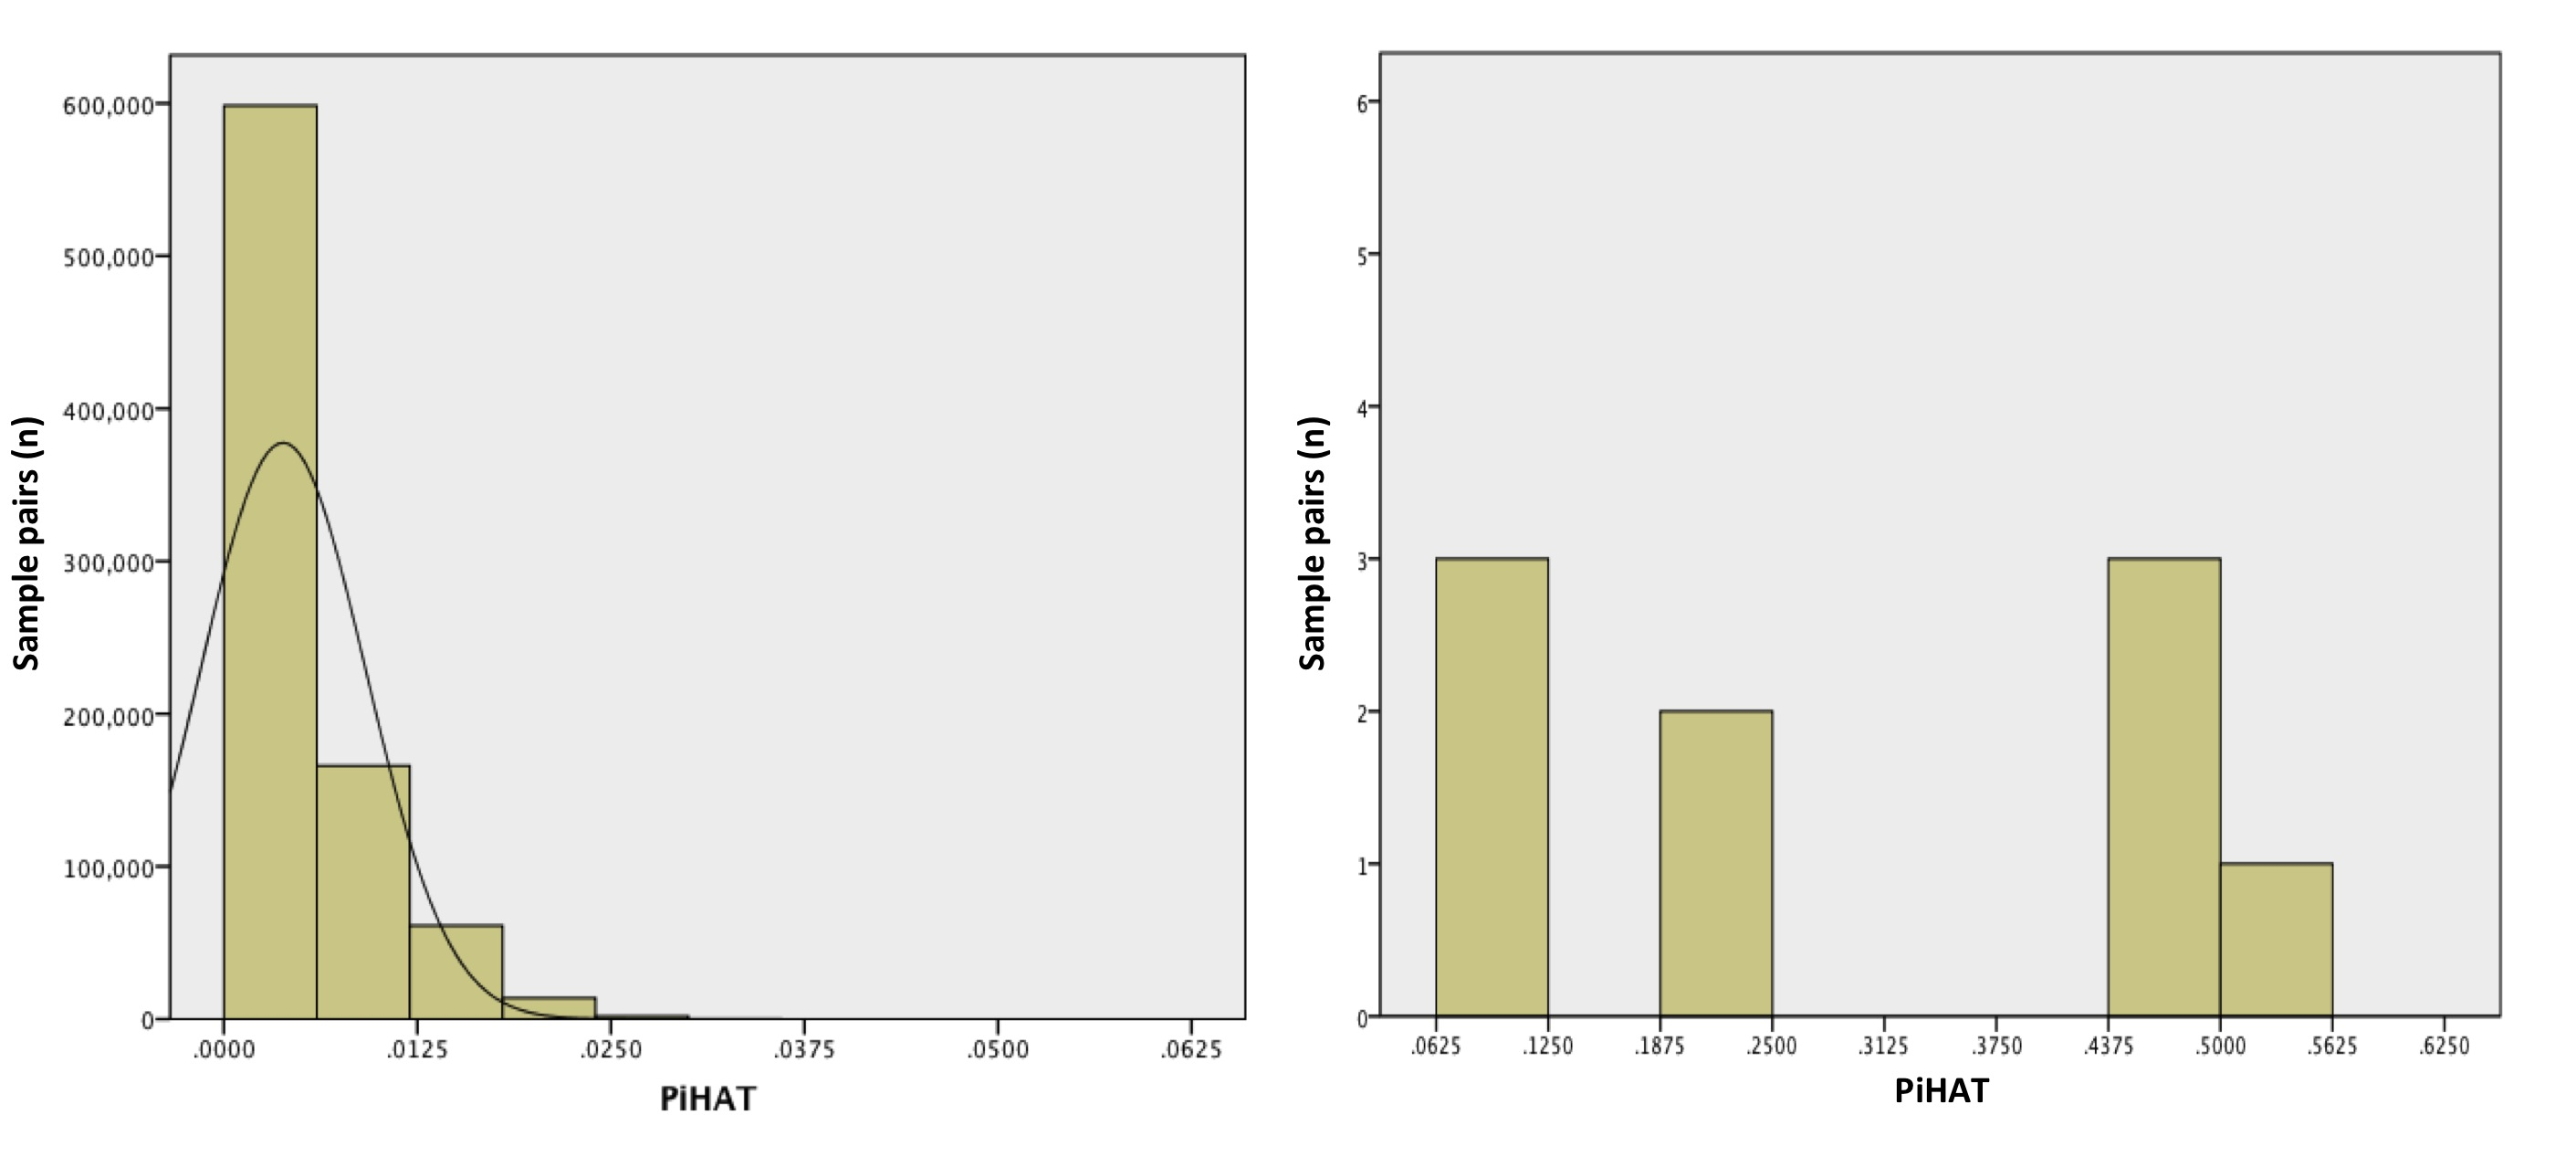


**Supplemental Figure S3.** Identity by Descent analysis for all cases within the whole cohort (a), and for those with cryptic ancestry suggesting between 1st-4th degree relatedness (b). PiHAT scores of 0.625, 0.125, 0.25 and 0.5 were considered as 4th, 3rd, 2nd and 1st degree relatives respectively. A description of the 9 pairs with cryptic ancestry can be seen in Supplemental Table S6.
