# Supplementary material for: Genetic compendium of 1511 human brains available through the UK Medical Research Council Brain Banks Network Resource
Source: HighWire-hosted journal article supplement (doi:10.1101/gr.210609.116), 2016-12-21
Supplement: Supplemental_Figure_S4.docx [file Supplemental_Figure_S4.docx]

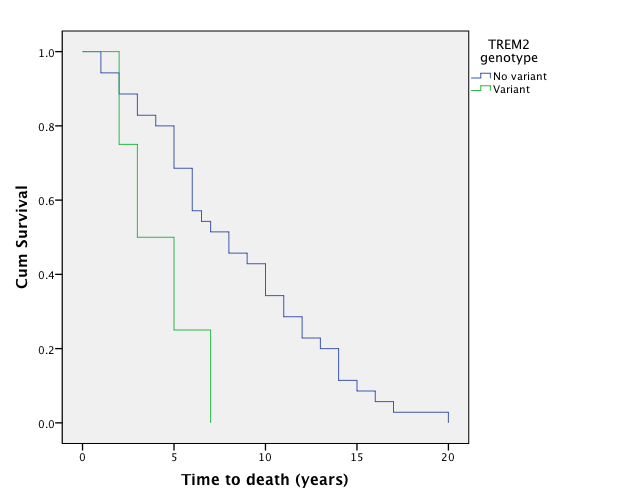


**Supplemental Figure S4.** Genotype-clinical and genotype-pathological correlates of disease. Kaplan Meier curve of time to death for Alzheimer disease cases with *TREM2* variants (green line) and no *TREM2* variant (blue line) (p=0.024, Mantel-Cox test).
