# Supplementary material for: Genetic compendium of 1511 human brains available through the UK Medical Research Council Brain Banks Network Resource
Source: HighWire-hosted journal article supplement (doi:10.1101/gr.210609.116), 2016-12-21
Supplement: Supplemental_Methods.docx [file Supplemental_Methods.docx]

**Supplemental Methods**

**Case cohort allocation**

The *ante mortem* diagnosis was defined by the treating clinician’s working diagnosis in life. The *post mortem* diagnosis was consensus neuropathological diagnosis at death. A clinical vignette of the case, together with a synopsis of the neuropathological report and all quantitative neuropathological criteria (defined below), were also requested and provided when available. All data was reviewed by the study team. Each disease cohort included brains with an *ante mortem* clinical diagnosis consistent with a neurodegenerative disorder and clinical criteria fulfilling the specific neurodegenerative disease at the time of diagnosis. In cases in which a broad phenotype (e.g. ‘dementia’) was recorded, and neuropathology was consistent with a specific diagnosis, they were included within the cohort as defined by their neuropathology. Control cases were defined as those in which a Braak neurofibrillary tangle stage was 2 or lower and there were no other features suggestive of a neurodegenerative disease in either *ante mortem* data, or *post mortem* assessment. Cases ascribed to ‘Vascular disease’ were those in which either there was a history in life suggestive of cognitive impairment with at least one large territorial vascular anomaly such as stroke had occurred, or where Braak stage was unknown. Those ascribed to ‘vascular/control’ showed no large territorial infarcts, no history suggestive of *ante mortem* cognitive impairment and had a Braak stage of less than 2.

All rare neurological diseases, those without *ante mortem* data, or those in which the neuropathology did not fulfill criteria for a specific diagnosis were included into the ‘other’ category and defined by a discrete descriptive term, individual to each case, summarizing the overall clinical and neuropathological phenotype.

**Neuropathological assessment**

For non-Creutzfelt-Jakob Disease (CJD) cases, additional quantitative neuropathological criteria were obtained when available. These included: Thal phase for Amyloid beta (Thal et al. 2002) , Braak neurofibrillary tangle stage (Braak et al. 2006), CERAD score (Mirra et al. 1991), ABC score (Montine et al. 2012), Braak stage for alpha-synuclein (Braak et al. 2001), McKeith Lewy body stage (McKeith et al. 2005), Cerebral Amyloid Angiopathy (CAA) staging (Attems et al. 2011), the presence of TDP-43 pathology and stage (Mackenzie et al. 2011), and presence of 3R or 4R tauopathy, fused in sarcoma (FUS) or ubiquitin staining. For cases of CJD, the presence of cerebrospinal fluid (CSF) 14-3-3 protein, and the s100b protein together with MRI imaging features were also requested and provided where available.

**DNA extraction**

Tissue samples (20-30mg) were extracted from Cerebellum (n=1323), Cerebral cortex (lobe undefined) (n=54), Frontal cortex (n=30), Temporal cortex (n=8), Occipital cortex (n=4), Basal ganglia (n=4), Caudate (n=3), *Substantia Nigra* (n=2), Muscle (n=1), and undefined brain region (n=81). Automated DNA extraction was performed using a DNA extraction robot (Qiasymphony SP robot; Qiagen, Hilden, Germany). Tissue was lysed in 180 μl of ATL buffer (Qiagen, Hilden, Germany) and 20 μl of Proteinase K (Qiagen, Hilden, Germany). Lysates were incubated overnight at 56 °C and at 900 rpm before being loaded onto the Qiasymphony robot. Subsequent extraction was performed using the Qiasymphony DNA mini kit reagents (Qiagen, Hilden, Germany), as per manufacturers protocol. DNA yield was measured using the Nanodrop-8000 Spectrophotometer (NanoDrop Technologies).

**Exome sequencing – Quality Control**

*Coverage* – Samples with a mean coverage below 30 fold were excluded. To exclude inadvertent duplicate samples, variant calls with a base quality score of 30 and read depth of 10 were converted into PLINK v2.050 (Purcell et al. 2007) binary genotyping format using in-house scripts. Pairwise relationships were subsequently determine using KING (Manichaikul et al. 2010) allowing for the existence of population structure. Duplicate samples were determined by kinship estimates restricted to first degree or second-degree relatives only using the –related option.

**Single Nucleotide Variant (SNV) genotyping – Identity By Descent (IBD)**

Stringent quality control (QC) filters were applied to remove poorly performing samples using PLINK v2.050 (Purcell et al. 2007). Individuals were excluded if data showed a missing rate > 5%. SNPs with a minor allele frequency of < 40%, a genotyping rate < 95%, or showing departure from Hardy-Weinberg equilibrium (p<1x10-8). Kinship coefficients were determined across the dataset as measured by the PI_HAT score in PLINK.

**Single Nucleotide Variant (SNV) genotyping – Copy Number Variant calling**

We followed a modified method of that described by Cooper et al (Cooper et al. 2015) utilizing Log-R-ratio (LRR) and B-allele frequency (BAF) scores from raw allele probe intensities. In this process, samples and SNPs with call rates < 95% were first removed. No subsequent quality control (QC) was applied based on the Minor Allele Frequency (MAF) as SNVs with rare alleles still provide LRR information even when monomorphic. Subsequently several levels of QC we undertaken, with three QC statistics calculated: mean LRR; Derivative log-ratio spread; and GC Wave Factor; each using custom in-house scripts in R ([www.R-project.org](http://www.R-project.org)). These were calculated simultaneously and samples failing any one were excluded from subsequent analysis.

*Mean Exclusion:* LRR-means for all samples passing initial QC were calculated, and samples outside the upper or lower bounds (1.5x the interquartile range) of the overall mean were excluded.

*Derivative log-ratio spread:* derivative log-ratio spread (DRLS) was calculated as the standard deviation (SD) of the differences between successive array SNV markers (according to genome position), divided by the square root of 2. A sample exclusion threshold of 3.5 SD above the cohort mean was applied.

*GC wave exclusion:* In keeping with the methods described by Cooper et al (Cooper et al. 2015), guanine and cytosine (GC) wave was evaluated to remove samples with substantial wave intensity fluctuations. GC score was calculated by the ‘total wave factor’ (as described previously (Diskin et al. 2008) ) and is defined by the median of the absolute median absolute deviation(MAD) of LRR, with sign determined by correlation with GC percentage. Samples with a total wave factor > 3.5 SD above the mean were excluded.

*Plate exclusion:* As plate effects can induce some of the strongest bias in CNV estimates, plates in which 40% of samples failed QC, or where the number of failed samples was > 3.5 SDs above the study mean were removed.

*PCA correction:* 10% of post QC autosomal SNVs were selected and a PCA was performed in R using the bigPCA R library. The 6 largest linear components were used to correct the data. In addition, X-chromosomal calls were corrected based on autosomal SNVs.

*QuantiSNP and further filtering:* Using the corrected LRR from the original BAF samples, quantiSNP was performed as previously described (Colella et al. 2007). Subsequently, SNVs spanning telomeric or centromeric regions were excluded together with genes in major histocompatibility complexes (MHC) and immunoglobulin genes (Cooper et al. 2015). In addition, samples for which the total number of CNVs exceeded 3 SDs above the mean number of CNVs per sample were excluded from the analysis.

*Restriction to rare CNVs:* To exclude our analysis to rare CNVs, we excluded any CNV which had an 80% or greater overlap with CNVs known to occur in greater than 1% of individuals from reference databases (MacDonald et al. 2014).

***APOE* genotyping**

APOE genotyping was performed by competitive allele-specific PCR, using KASPTM genotyping assays (LGC, UK) for both rs7412 and rs429358. Subsequent genotype data was converted into APOE e4 allele status (Weisgraber et al. 1982). Full methods for the KASPTM genotyping platform are available from LGC (<http://www.lgcgenomics.com/genotyping/kasp-genotyping-reagents/>).

**Methods - phenotype case assessment**

Genes known to cause monogenic forms of neurodegenerative diseases, or in which protein coding variants are known to modify risk are outlined in

Supplementary Table 2 along with the inheritance pattern for which they cause disease. These genes are a modified list based our previous study (Keogh et al. 2016). The 80 cases with a rare neurological disorder were included into the ‘other’ category (Supplemental_Table_S1), due to either missing clinical data, non-conformation to strict diagnostic criteria for common neurodegenerative disorders or due to a rare neurological disorder.

Cases of; adult onset gangliosidosis (n=1), cerebello-olivary atrophy (n=2), chorea-acanthocytosis (n=1), Huntington’s disease phenocopy (n=1), Kuf’s disease (n=1), infantile onset mitochondrial disease (n=1), probable neurodegeneration with brain iron accumulation (n=1) and primary familial basal ganglia calcification (n=2) were assessed using all control cases (of any age) and vascular disease aged cases as internal controls (n=380).

Variant filtering was performed for mis-sense variants with a predicted deleterious function by Polyphen2 (Adzhubei et al. 2010), start and stop codon mutations, frameshift variants and splice-site altering variants with a MAF < 0.01% in 1000 Genome Project Database (Genomes Project et al. 2012), and the European American cases from the NHLBI ESP exomes database . Genes previously described as causing familial forms of these disorders were subsequently selected (Supplemental_Table_S11). Recessive variations only were sought in for the case of infantile onset mitochondrial disease.

**References**

NHLBI GO Exome Sequencing Project (ESP). Vol 2013. Seattle, WA

Adzhubei IA, Schmidt S, Peshkin L, Ramensky VE, Gerasimova A, Bork P, Kondrashov AS, Sunyaev SR. 2010. A method and server for predicting damaging missense mutations. *Nat Methods* **7**: 248-249.

Attems J, Jellinger K, Thal DR, Van Nostrand W. 2011. Review: sporadic cerebral amyloid angiopathy. *Neuropathology and applied neurobiology* **37**: 75-93.

Braak E, Sandmann-Keil D, Rub U, Gai WP, de Vos RA, Steur EN, Arai K, Braak H. 2001. alpha-synuclein immunopositive Parkinson's disease-related inclusion bodies in lower brain stem nuclei. *Acta neuropathologica* **101**: 195-201.

Braak H, Alafuzoff I, Arzberger T, Kretzschmar H, Del Tredici K. 2006. Staging of Alzheimer disease-associated neurofibrillary pathology using paraffin sections and immunocytochemistry. *Acta neuropathologica* **112**: 389-404.

Colella S, Yau C, Taylor JM, Mirza G, Butler H, Clouston P, Bassett AS, Seller A, Holmes CC, Ragoussis J. 2007. QuantiSNP: an Objective Bayes Hidden-Markov Model to detect and accurately map copy number variation using SNP genotyping data. *Nucleic acids research* **35**: 2013-2025.

Cooper NJ, Shtir CJ, Smyth DJ, Guo H, Swafford AD, Zanda M, Hurles ME, Walker NM, Plagnol V, Cooper JD et al. 2015. Detection and correction of artefacts in estimation of rare copy number variants and analysis of rare deletions in type 1 diabetes. *Human molecular genetics* **24**: 1774-1790.

Diskin SJ, Li M, Hou C, Yang S, Glessner J, Hakonarson H, Bucan M, Maris JM, Wang K. 2008. Adjustment of genomic waves in signal intensities from whole-genome SNP genotyping platforms. *Nucleic acids research* **36**: e126.

Genomes Project C, Abecasis GR, Auton A, Brooks LD, DePristo MA, Durbin RM, Handsaker RE, Kang HM, Marth GT, McVean GA. 2012. An integrated map of genetic variation from 1,092 human genomes. *Nature* **491**: 56-65.

Keogh MJ, Kurzawa-Akanbi M, Griffin H, Douroudis K, Ayers KL, Hussein RI, Hudson G, Pyle A, Cordell HJ, Attems J et al. 2016. Exome sequencing in dementia with Lewy bodies. *Translational psychiatry* **6**: e728.

MacDonald JR, Ziman R, Yuen RK, Feuk L, Scherer SW. 2014. The Database of Genomic Variants: a curated collection of structural variation in the human genome. *Nucleic acids research* **42**: D986-992.

Mackenzie IR, Neumann M, Baborie A, Sampathu DM, Du Plessis D, Jaros E, Perry RH, Trojanowski JQ, Mann DM, Lee VM. 2011. A harmonized classification system for FTLD-TDP pathology. *Acta neuropathologica* **122**: 111-113.

Manichaikul A, Mychaleckyj JC, Rich SS, Daly K, Sale M, Chen WM. 2010. Robust relationship inference in genome-wide association studies. *Bioinformatics* **26**: 2867-2873.

McKeith IG, Dickson DW, Lowe J, Emre M, O'Brien JT, Feldman H, Cummings J, Duda JE, Lippa C, Perry EK et al. 2005. Diagnosis and management of dementia with Lewy bodies: third report of the DLB Consortium. *Neurology* **65**: 1863-1872.

Mirra SS, Heyman A, McKeel D, Sumi SM, Crain BJ, Brownlee LM, Vogel FS, Hughes JP, van Belle G, Berg L. 1991. The Consortium to Establish a Registry for Alzheimer's Disease (CERAD). Part II. Standardization of the neuropathologic assessment of Alzheimer's disease. *Neurology* **41**: 479-486.

Montine TJ, Phelps CH, Beach TG, Bigio EH, Cairns NJ, Dickson DW, Duyckaerts C, Frosch MP, Masliah E, Mirra SS et al. 2012. National Institute on Aging-Alzheimer's Association guidelines for the neuropathologic assessment of Alzheimer's disease: a practical approach. *Acta neuropathologica* **123**: 1-11.

Purcell S, Neale B, Todd-Brown K, Thomas L, Ferreira MA, Bender D, Maller J, Sklar P, de Bakker PI, Daly MJ et al. 2007. PLINK: a tool set for whole-genome association and population-based linkage analyses. *Am J Hum Genet* **81**: 559-575.

Thal DR, Rub U, Orantes M, Braak H. 2002. Phases of A beta-deposition in the human brain and its relevance for the development of AD. *Neurology* **58**: 1791-1800.

Weisgraber KH, Innerarity TL, Mahley RW. 1982. Abnormal lipoprotein receptor-binding activity of the human E apoprotein due to cysteine-arginine interchange at a single site. *The Journal of biological chemistry* **257**: 2518-2521.
