# Supplementary material for: Genetic compendium of 1511 human brains available through the UK Medical Research Council Brain Banks Network Resource
Source: HighWire-hosted journal article supplement (doi:10.1101/gr.210609.116), 2016-12-21
Supplement: Supplemental_References.docx [file Supplemental_References.docx]

**References for Case_data.xls and Variant_data.xls**

Adzhubei IA, Schmidt S, Peshkin L, Ramensky VE, Gerasimova A, Bork P, Kondrashov AS, Sunyaev SR. 2010. A method and server for predicting damaging missense mutations. *Nat Methods* **7**(4): 248-249.

Al-Chalabi A, Andersen PM, Chioza B, Shaw C, Sham PC, Robberecht W, Matthijs G, Camu W, Marklund SL, Forsgren L et al. 1998. Recessive amyotrophic lateral sclerosis families with the D90A SOD1 mutation share a common founder: evidence for a linked protective factor. *Human molecular genetics* **7**(13): 2045-2050.

An JJ, Lee YP, Kim SY, Lee SH, Kim DW, Lee MJ, Jeong MS, Jang SH, Kang JH, Kwon HY et al. 2008. Transduction of familial amyotrophic lateral sclerosis-related mutant PEP-1-SOD proteins into neuronal cells. *Mol Cells* **25**(1): 55-63.

Andersen PM, Nilsson P, Ala-Hurula V, Keranen ML, Tarvainen I, Haltia T, Nilsson L, Binzer M, Forsgren L, Marklund SL. 1995. Amyotrophic lateral sclerosis associated with homozygosity for an Asp90Ala mutation in CuZn-superoxide dismutase. *Nature genetics* **10**(1): 61-66.

Appel-Cresswell S, Vilarino-Guell C, Encarnacion M, Sherman H, Yu I, Shah B, Weir D, Thompson C, Szu-Tu C, Trinh J et al. 2013. Alpha-synuclein p.H50Q, a novel pathogenic mutation for Parkinson's disease. *Movement disorders : official journal of the Movement Disorder Society* **28**(6): 811-813.

Ayers J, Lelie H, Workman A, Prudencio M, Brown H, Fromholt S, Valentine J, Whitelegge J, Borchelt D. 2014. Distinctive features of the D101N and D101G variants of superoxide dismutase 1; two mutations that produce rapidly progressing motor neuron disease. *Journal of neurochemistry* **128**(2): 305-314.

Baker M, Mackenzie IR, Pickering-Brown SM, Gass J, Rademakers R, Lindholm C, Snowden J, Adamson J, Sadovnick AD, Rollinson S et al. 2006. Mutations in progranulin cause tau-negative frontotemporal dementia linked to chromosome 17. *Nature* **442**(7105): 916-919.

Beck J, Rohrer JD, Campbell T, Isaacs A, Morrison KE, Goodall EF, Warrington EK, Stevens J, Revesz T, Holton J et al. 2008. A distinct clinical, neuropsychological and radiological phenotype is associated with progranulin gene mutations in a large UK series. *Brain : a journal of neurology* **131**(Pt 3): 706-720.

Beck JA, Poulter M, Campbell TA, Adamson G, Uphill JB, Guerreiro R, Jackson GS, Stevens JC, Manji H, Collinge J et al. 2010. PRNP allelic series from 19 years of prion protein gene sequencing at the MRC Prion Unit. *Human mutation* **31**(7): E1551-1563.

Belzil VV, Daoud H, St-Onge J, Desjarlais A, Bouchard JP, Dupre N, Lacomblez L, Salachas F, Pradat PF, Meininger V et al. 2011. Identification of novel FUS mutations in sporadic cases of amyotrophic lateral sclerosis. *Amyotrophic lateral sclerosis : official publication of the World Federation of Neurology Research Group on Motor Neuron Diseases* **12**(2): 113-117.

Benitez BA, Alvarado D, Cai Y, Mayo K, Chakraverty S, Norton J, Morris JC, Sands MS, Goate A, Cruchaga C. 2011. Exome-sequencing confirms DNAJC5 mutations as cause of adult neuronal ceroid-lipofuscinosis. *PloS one* **6**(11): e26741.

Bernardi L, Tomaino C, Anfossi M, Gallo M, Geracitano S, Costanzo A, Colao R, Puccio G, Frangipane F, Curcio SA et al. 2009. Novel PSEN1 and PGRN mutations in early-onset familial frontotemporal dementia. *Neurobiology of aging* **30**(11): 1825-1833.

Bersano A, Ranieri M, Ciammola A, Cinnante C, Lanfranconi S, Dotti MT, Candelise L, Baschirotto C, Ghione I, Ballabio E et al. 2012. Considerations on a mutation in the NOTCH3 gene sparing a cysteine residue: a rare polymorphism rather than a CADASIL variant. *Functional neurology* **27**(4): 247-252.

Bishop MT, Pennington C, Heath CA, Will RG, Knight RS. 2009. PRNP variation in UK sporadic and variant Creutzfeldt Jakob disease highlights genetic risk factors and a novel non-synonymous polymorphism. *BMC medical genetics* **10**: 146.

Borchelt DR, Ratovitski T, van Lare J, Lee MK, Gonzales V, Jenkins NA, Copeland NG, Price DL, Sisodia SS. 1997. Accelerated amyloid deposition in the brains of transgenic mice coexpressing mutant presenilin 1 and amyloid precursor proteins. *Neuron* **19**(4): 939-945.

Bras J, Simon-Sanchez J, Federoff M, Morgadinho A, Januario C, Ribeiro M, Cunha L, Oliveira C, Singleton AB. 2009. Lack of replication of association between GIGYF2 variants and Parkinson disease. *Human molecular genetics* **18**(2): 341-346.

Brouwers N, Sleegers K, Engelborghs S, Maurer-Stroh S, Gijselinck I, van der Zee J, Pickut BA, Van den Broeck M, Mattheijssens M, Peeters K et al. 2008. Genetic variability in progranulin contributes to risk for clinically diagnosed Alzheimer disease. *Neurology* **71**(9): 656-664.

Bystrom R, Andersen PM, Grobner G, Oliveberg M. 2010. SOD1 mutations targeting surface hydrogen bonds promote amyotrophic lateral sclerosis without reducing apo-state stability. *The Journal of biological chemistry* **285**(25): 19544-19552.

Cadieux-Dion M, Andermann E, Lachance-Touchette P, Ansorge O, Meloche C, Barnabe A, Kuzniecky RI, Andermann F, Faught E, Leonberg S et al. 2013. Recurrent mutations in DNAJC5 cause autosomal dominant Kufs disease. *Clinical genetics* **83**(6): 571-575.

Carecchio M, Fenoglio C, De Riz M, Guidi I, Comi C, Cortini F, Venturelli E, Restelli I, Cantoni C, Bresolin N et al. 2009. Progranulin plasma levels as potential biomarker for the identification of GRN deletion carriers. A case with atypical onset as clinical amnestic Mild Cognitive Impairment converted to Alzheimer's disease. *Journal of the neurological sciences* **287**(1-2): 291-293.

Chartier-Harlin MC, Dachsel JC, Vilarino-Guell C, Lincoln SJ, Lepretre F, Hulihan MM, Kachergus J, Milnerwood AJ, Tapia L, Song MS et al. 2011. Translation initiator EIF4G1 mutations in familial Parkinson disease. *American journal of human genetics* **89**(3): 398-406.

Chaussenot A, Le Ber I, Ait-El-Mkadem S, Camuzat A, de Septenville A, Bannwarth S, Genin EC, Serre V, Auge G, French research network on FTD et al. 2014. Screening of CHCHD10 in a French cohort confirms the involvement of this gene in frontotemporal dementia with amyotrophic lateral sclerosis patients. *Neurobiology of aging* **35**(12): 2884 e2881-2884.

Chen WT, Hsieh YF, Huang YJ, Lin CC, Lin YT, Liu YC, Lien CC, Cheng IH. 2014. G206D Mutation of Presenilin-1 Reduces Pen2 Interaction, Increases Abeta42/Abeta40 Ratio and Elevates ER Ca Accumulation. *Molecular neurobiology*.

Chen-Plotkin AS, Martinez-Lage M, Sleiman PM, Hu W, Greene R, Wood EM, Bing S, Grossman M, Schellenberg GD, Hatanpaa KJ et al. 2011. Genetic and clinical features of progranulin-associated frontotemporal lobar degeneration. *Archives of neurology* **68**(4): 488-497.

Cleveland DW, Rothstein JD. 2001. From Charcot to Lou Gehrig: deciphering selective motor neuron death in ALS. *Nature reviews Neuroscience* **2**(11): 806-819.

Cookson MR, Lockhart PJ, McLendon C, O'Farrell C, Schlossmacher M, Farrer MJ. 2003. RING finger 1 mutations in Parkin produce altered localization of the protein. *Human molecular genetics* **12**(22): 2957-2965.

Cornejo-Olivas MR, Yu CE, Mazzetti P, Mata IF, Meza M, Lindo-Samanamud S, Leverenz JB, Bird TD. 2014. Clinical and molecular studies reveal a PSEN1 mutation (L153V) in a Peruvian family with early-onset Alzheimer's disease. *Neuroscience letters* **563**: 140-143.

Couthouis J, Raphael AR, Daneshjou R, Gitler AD. 2014. Targeted exon capture and sequencing in sporadic amyotrophic lateral sclerosis. *PLoS genetics* **10**(10): e1004704.

Cox LE, Ferraiuolo L, Goodall EF, Heath PR, Higginbottom A, Mortiboys H, Hollinger HC, Hartley JA, Brockington A, Burness CE et al. 2010. Mutations in CHMP2B in lower motor neuron predominant amyotrophic lateral sclerosis (ALS). *PloS one* **5**(3): e9872.

Crabtree B, Thiyagarajan N, Prior SH, Wilson P, Iyer S, Ferns T, Shapiro R, Brew K, Subramanian V, Acharya KR. 2007. Characterization of human angiogenin variants implicated in amyotrophic lateral sclerosis. *Biochemistry* **46**(42): 11810-11818.

Cruchaga C, Haller G, Chakraverty S, Mayo K, Vallania FL, Mitra RD, Faber K, Williamson J, Bird T, Diaz-Arrastia R et al. 2012. Rare variants in APP, PSEN1 and PSEN2 increase risk for AD in late-onset Alzheimer's disease families. *PloS one* **7**(2): e31039.

Cruts M, Theuns J, Van Broeckhoven C. 2012. Locus-specific mutation databases for neurodegenerative brain diseases. *Human mutation* **33**(9): 1340-1344.

Dichgans M, Ludwig H, Muller-Hocker J, Messerschmidt A, Gasser T. 2000. Small in-frame deletions and missense mutations in CADASIL: 3D models predict misfolding of Notch3 EGF-like repeat domains. *European journal of human genetics : EJHG* **8**(4): 280-285.

Diomedi-Camassei F, Di Giandomenico S, Santorelli FM, Caridi G, Piemonte F, Montini G, Ghiggeri GM, Murer L, Barisoni L, Pastore A et al. 2007. COQ2 nephropathy: a newly described inherited mitochondriopathy with primary renal involvement. *Journal of the American Society of Nephrology : JASN* **18**(10): 2773-2780.

Fecto F, Yan J, Vemula SP, Liu E, Yang Y, Chen W, Zheng JG, Shi Y, Siddique N, Arrat H et al. 2011. SQSTM1 mutations in familial and sporadic amyotrophic lateral sclerosis. *Archives of neurology* **68**(11): 1440-1446.

Fernandez-Santiago R, Hoenig S, Lichtner P, Sperfeld AD, Sharma M, Berg D, Weichenrieder O, Illig T, Eger K, Meyer T et al. 2009. Identification of novel Angiogenin (ANG) gene missense variants in German patients with amyotrophic lateral sclerosis. *Journal of neurology* **256**(8): 1337-1342.

Ferri A, Cozzolino M, Crosio C, Nencini M, Casciati A, Gralla EB, Rotilio G, Valentine JS, Carri MT. 2006. Familial ALS-superoxide dismutases associate with mitochondria and shift their redox potentials. *Proceedings of the National Academy of Sciences of the United States of America* **103**(37): 13860-13865.

Finch N, Baker M, Crook R, Swanson K, Kuntz K, Surtees R, Bisceglio G, Rovelet-Lecrux A, Boeve B, Petersen RC et al. 2009. Plasma progranulin levels predict progranulin mutation status in frontotemporal dementia patients and asymptomatic family members. *Brain : a journal of neurology* **132**(Pt 3): 583-591.

Finckh U, Muller-Thomsen T, Mann U, Eggers C, Marksteiner J, Meins W, Binetti G, Alberici A, Hock C, Nitsch RM et al. 2000. High prevalence of pathogenic mutations in patients with early-onset dementia detected by sequence analyses of four different genes. *American journal of human genetics* **66**(1): 110-117.

Forbes N, Goodwin S, Woodward K, Morgan DG, Brady L, Coulthart MB, Tarnopolsky MA. 2014. Evidence for synergistic effects of PRNP and ATP7B mutations in severe neuropsychiatric deterioration. *BMC medical genetics* **15**: 22.

Fratta P, Charnock J, Collins T, Devoy A, Howard R, Malaspina A, Orrell R, Sidle K, Clarke J, Shoai M et al. 2014. Profilin1 E117G is a moderate risk factor for amyotrophic lateral sclerosis. *Journal of neurology, neurosurgery, and psychiatry* **85**(5): 506-508.

Friedman-Levi Y, Meiner Z, Canello T, Frid K, Kovacs GG, Budka H, Avrahami D, Gabizon R. 2011. Fatal prion disease in a mouse model of genetic E200K Creutzfeldt-Jakob disease. *PLoS pathogens* **7**(11): e1002350.

Fujisawa T, Homma K, Yamaguchi N, Kadowaki H, Tsuburaya N, Naguro I, Matsuzawa A, Takeda K, Takahashi Y, Goto J et al. 2012. A novel monoclonal antibody reveals a conformational alteration shared by amyotrophic lateral sclerosis-linked SOD1 mutants. *Annals of neurology* **72**(5): 739-749.

Gass J, Cannon A, Mackenzie IR, Boeve B, Baker M, Adamson J, Crook R, Melquist S, Kuntz K, Petersen R et al. 2006. Mutations in progranulin are a major cause of ubiquitin-positive frontotemporal lobar degeneration. *Human molecular genetics* **15**(20): 2988-3001.

Geisler S, Holmstrom KM, Treis A, Skujat D, Weber SS, Fiesel FC, Kahle PJ, Springer W. 2010. The PINK1/Parkin-mediated mitophagy is compromised by PD-associated mutations. *Autophagy* **6**(7): 871-878.

Gellera C, Colombrita C, Ticozzi N, Castellotti B, Bragato C, Ratti A, Taroni F, Silani V. 2008. Identification of new ANG gene mutations in a large cohort of Italian patients with amyotrophic lateral sclerosis. *Neurogenetics* **9**(1): 33-40.

Ghani M, Lang AE, Zinman L, Nacmias B, Sorbi S, Bessi V, Tedde A, Tartaglia MC, Surace EI, Sato C et al. 2015. Mutation analysis of patients with neurodegenerative disorders using NeuroX array. *Neurobiology of aging* **36**(1): 545 e549-514.

Ghanim M, Guillot-Noel L, Pasquier F, Jornea L, Deramecourt V, Dubois B, Le Ber I, Brice A, French Research Network on FTD, Ftd/Mnd. 2010. CHMP2B mutations are rare in French families with frontotemporal lobar degeneration. *Journal of neurology* **257**(12): 2032-2036.

Giliberto L, Borghi R, Piccini A, Mangerini R, Sorbi S, Cirmena G, Garuti A, Ghetti B, Tagliavini F, Mughal MR et al. 2009. Mutant presenilin 1 increases the expression and activity of BACE1. *The Journal of biological chemistry* **284**(14): 9027-9038.

Gomez-Isla T, Growdon WB, McNamara MJ, Nochlin D, Bird TD, Arango JC, Lopera F, Kosik KS, Lantos PL, Cairns NJ et al. 1999. The impact of different presenilin 1 andpresenilin 2 mutations on amyloid deposition, neurofibrillary changes and neuronal loss in the familial Alzheimer's disease brain: evidence for other phenotype-modifying factors. *Brain : a journal of neurology* **122 ( Pt 9)**: 1709-1719.

Gomez-Isla T, Wasco W, Pettingell WP, Gurubhagavatula S, Schmidt SD, Jondro PD, McNamara M, Rodes LA, DiBlasi T, Growdon WB et al. 1997. A novel presenilin-1 mutation: increased beta-amyloid and neurofibrillary changes. *Annals of neurology* **41**(6): 809-813.

Greaves J, Lemonidis K, Gorleku OA, Cruchaga C, Grefen C, Chamberlain LH. 2012. Palmitoylation-induced aggregation of cysteine-string protein mutants that cause neuronal ceroid lipofuscinosis. *The Journal of biological chemistry* **287**(44): 37330-37339.

Groen EJ, Fumoto K, Blokhuis AM, Engelen-Lee J, Zhou Y, van den Heuvel DM, Koppers M, van Diggelen F, van Heest J, Demmers JA et al. 2013. ALS-associated mutations in FUS disrupt the axonal distribution and function of SMN. *Human molecular genetics* **22**(18): 3690-3704.

Guella I, Pistocchi A, Asselta R, Rimoldi V, Ghilardi A, Sironi F, Trotta L, Primignani P, Zini M, Zecchinelli A et al. 2011. Mutational screening and zebrafish functional analysis of GIGYF2 as a Parkinson-disease gene. *Neurobiology of aging* **32**(11): 1994-2005.

Guerreiro RJ, Baquero M, Blesa R, Boada M, Bras JM, Bullido MJ, Calado A, Crook R, Ferreira C, Frank A et al. 2010. Genetic screening of Alzheimer's disease genes in Iberian and African samples yields novel mutations in presenilins and APP. *Neurobiology of aging* **31**(5): 725-731.

Heilig EA, Xia W, Shen J, Kelleher RJ, 3rd. 2010. A presenilin-1 mutation identified in familial Alzheimer disease with cotton wool plaques causes a nearly complete loss of gamma-secretase activity. *The Journal of biological chemistry* **285**(29): 22350-22359.

Henn IH, Bouman L, Schlehe JS, Schlierf A, Schramm JE, Wegener E, Nakaso K, Culmsee C, Berninger B, Krappmann D et al. 2007. Parkin mediates neuroprotection through activation of IkappaB kinase/nuclear factor-kappaB signaling. *The Journal of neuroscience : the official journal of the Society for Neuroscience* **27**(8): 1868-1878.

Hocking LJ, Lucas GJ, Daroszewska A, Cundy T, Nicholson GC, Donath J, Walsh JP, Finlayson C, Cavey JR, Ciani B et al. 2004. Novel UBA domain mutations of SQSTM1 in Paget's disease of bone: genotype phenotype correlation, functional analysis, and structural consequences. *Journal of bone and mineral research : the official journal of the American Society for Bone and Mineral Research* **19**(7): 1122-1127.

Jankowsky JL, Fadale DJ, Anderson J, Xu GM, Gonzales V, Jenkins NA, Copeland NG, Lee MK, Younkin LH, Wagner SL et al. 2004. Mutant presenilins specifically elevate the levels of the 42 residue beta-amyloid peptide in vivo: evidence for augmentation of a 42-specific gamma secretase. *Human molecular genetics* **13**(2): 159-170.

Janssen JC, Beck JA, Campbell TA, Dickinson A, Fox NC, Harvey RJ, Houlden H, Rossor MN, Collinge J. 2003. Early onset familial Alzheimer's disease: Mutation frequency in 31 families. *Neurology* **60**(2): 235-239.

Jonsson PA, Graffmo KS, Andersen PM, Brannstrom T, Lindberg M, Oliveberg M, Marklund SL. 2006a. Disulphide-reduced superoxide dismutase-1 in CNS of transgenic amyotrophic lateral sclerosis models. *Brain : a journal of neurology* **129**(Pt 2): 451-464.

Jonsson PA, Graffmo KS, Brannstrom T, Nilsson P, Andersen PM, Marklund SL. 2006b. Motor neuron disease in mice expressing the wild type-like D90A mutant superoxide dismutase-1. *J Neuropathol Exp Neurol* **65**(12): 1126-1136.

Kabashi E, Bercier V, Lissouba A, Liao M, Brustein E, Rouleau GA, Drapeau P. 2011. FUS and TARDBP but not SOD1 interact in genetic models of amyotrophic lateral sclerosis. *PLoS genetics* **7**(8): e1002214.

Kabashi E, El Oussini H, Bercier V, Gros-Louis F, Valdmanis PN, McDearmid J, Mejier IA, Dion PA, Dupre N, Hollinger D et al. 2013. Investigating the contribution of VAPB/ALS8 loss of function in amyotrophic lateral sclerosis. *Human molecular genetics* **22**(12): 2350-2360.

Karumbayaram S, Kelly TK, Paucar AA, Roe AJ, Umbach JA, Charles A, Goldman SA, Kornblum HI, Wiedau-Pazos M. 2009. Human embryonic stem cell-derived motor neurons expressing SOD1 mutants exhibit typical signs of motor neuron degeneration linked to ALS. *Disease models & mechanisms* **2**(3-4): 189-195.

Khoris J, Moulard B, Briolotti V, Hayer M, Durieux A, Clavelou P, Malafosse A, Rouleau GA, Camu W. 2000. Coexistence of dominant and recessive familial amyotrophic lateral sclerosis with the D90A Cu,Zn superoxide dismutase mutation within the same country. *European journal of neurology : the official journal of the European Federation of Neurological Societies* **7**(2): 207-211.

Kim HJ, Kim HY, Ki CS, Kim SH. 2010. Presenilin 1 gene mutation (M139I) in a patient with an early-onset Alzheimer's disease: clinical characteristics and genetic identification. *Neurological sciences : official journal of the Italian Neurological Society and of the Italian Society of Clinical Neurophysiology* **31**(6): 781-783.

Kim HJ, Kim NC, Wang YD, Scarborough EA, Moore J, Diaz Z, MacLea KS, Freibaum B, Li S, Molliex A et al. 2013. Mutations in prion-like domains in hnRNPA2B1 and hnRNPA1 cause multisystem proteinopathy and ALS. *Nature* **495**(7442): 467-473.

King A, Al-Sarraj S, Troakes C, Smith BN, Maekawa S, Iovino M, Spillantini MG, Shaw CE. 2013. Mixed tau, TDP-43 and p62 pathology in FTLD associated with a C9ORF72 repeat expansion and p.Ala239Thr MAPT (tau) variant. *Acta neuropathologica* **125**(2): 303-310.

Kirby J, Highley JR, Cox L, Goodall EF, Hewitt C, Hartley JA, Hollinger HC, Fox M, Ince PG, McDermott CJ et al. 2013. Lack of unique neuropathology in amyotrophic lateral sclerosis associated with p.K54E angiogenin (ANG) mutation. *Neuropathology and applied neurobiology* **39**(5): 562-571.

Klein C, Djarmati A, Hedrich K, Schafer N, Scaglione C, Marchese R, Kock N, Schule B, Hiller A, Lohnau T et al. 2005. PINK1, Parkin, and DJ-1 mutations in Italian patients with early-onset parkinsonism. *European journal of human genetics : EJHG* **13**(9): 1086-1093.

Kumar P, Henikoff S, Ng PC. 2009. Predicting the effects of coding non-synonymous variants on protein function using the SIFT algorithm. *Nat Protoc* **4**(7): 1073-1081.

Kurihara N, Hiruma Y, Zhou H, Subler MA, Dempster DW, Singer FR, Reddy SV, Gruber HE, Windle JJ, Roodman GD. 2007. Mutation of the sequestosome 1 (p62) gene increases osteoclastogenesis but does not induce Paget disease. *The Journal of clinical investigation* **117**(1): 133-142.

Kwok CT, Morris A, de Belleroche JS. 2014. Sequestosome-1 (SQSTM1) sequence variants in ALS cases in the UK: prevalence and coexistence of SQSTM1 mutations in ALS kindred with PDB. *European journal of human genetics : EJHG* **22**(4): 492-496.

Landers JE, Leclerc AL, Shi L, Virkud A, Cho T, Maxwell MM, Henry AF, Polak M, Glass JD, Kwiatkowski TJ et al. 2008. New VAPB deletion variant and exclusion of VAPB mutations in familial ALS. *Neurology* **70**(14): 1179-1185.

Larner AJ, Ray PS, Doran M. 2007. The R269H mutation in presenilin-1 presenting as late-onset autosomal dominant Alzheimer's disease. *Journal of the neurological sciences* **252**(2): 173-176.

Lautier C, Goldwurm S, Durr A, Giovannone B, Tsiaras WG, Pezzoli G, Brice A, Smith RJ. 2008. Mutations in the GIGYF2 (TNRC15) gene at the PARK11 locus in familial Parkinson disease. *American journal of human genetics* **82**(4): 822-833.

Le Ber I, Camuzat A, Guerreiro R, Bouya-Ahmed K, Bras J, Nicolas G, Gabelle A, Didic M, De Septenville A, Millecamps S et al. 2013. SQSTM1 Mutations in French Patients With Frontotemporal Dementia or Frontotemporal Dementia With Amyotrophic Lateral Sclerosis. *JAMA Neurol* **70**(11): 1403-1410.

Le Ber I, van der Zee J, Hannequin D, Gijselinck I, Campion D, Puel M, Laquerriere A, De Pooter T, Camuzat A, Van den Broeck M et al. 2007. Progranulin null mutations in both sporadic and familial frontotemporal dementia. *Human mutation* **28**(9): 846-855.

Lesage S, Condroyer C, Klebe S, Lohmann E, Durif F, Damier P, Tison F, Anheim M, Honore A, Viallet F et al. 2012. EIF4G1 in familial Parkinson's disease: pathogenic mutations or rare benign variants? *Neurobiology of aging* **33**(9): 2233 e2231-2233 e2235.

Liu ZJ, Li HF, Tan GH, Tao QQ, Ni W, Cheng XW, Xiong ZQ, Wu ZY. 2014. Identify mutation in amyotrophic lateral sclerosis cases using HaloPlex target enrichment system. *Neurobiology of aging* **35**(12): 2881 e2811-2885.

Lleo A, Blesa R, Queralt R, Ezquerra M, Molinuevo JL, Pena-Casanova J, Rojo A, Oliva R. 2002. Frequency of mutations in the presenilin and amyloid precursor protein genes in early-onset Alzheimer disease in Spain. *Archives of neurology* **59**(11): 1759-1763.

Lopez LC, Quinzii CM, Area E, Naini A, Rahman S, Schuelke M, Salviati L, Dimauro S, Hirano M. 2010. Treatment of CoQ(10) deficient fibroblasts with ubiquinone, CoQ analogs, and vitamin C: time- and compound-dependent effects. *PloS one* **5**(7): e11897.

MacArthur DG, Manolio TA, Dimmock DP, Rehm HL, Shendure J, Abecasis GR, Adams DR, Altman RB, Antonarakis SE, Ashley EA et al. 2014. Guidelines for investigating causality of sequence variants in human disease. *Nature* **508**(7497): 469-476.

Majounie E, Traynor BJ, Chio A, Restagno G, Mandrioli J, Benatar M, Taylor JP, Singleton AB. 2012. Mutational analysis of the VCP gene in Parkinson's disease. *Neurobiology of aging* **33**(1): 209 e201-202.

Mandellos D, Limbitaki G, Papadimitriou A, Anastasopoulos D. 2005. Cerebral autosomal dominant arteriopathy with subcortical infarcts and leukoencephalopathy (CADASIL) in a Greek family. *Neurological sciences : official journal of the Italian Neurological Society and of the Italian Society of Clinical Neurophysiology* **26**(4): 278-281.

Maruyama H, Morino H, Ito H, Izumi Y, Kato H, Watanabe Y, Kinoshita Y, Kamada M, Nodera H, Suzuki H et al. 2010. Mutations of optineurin in amyotrophic lateral sclerosis. *Nature* **465**(7295): 223-226.

Masellis M, Momeni P, Meschino W, Heffner R, Jr., Elder J, Sato C, Liang Y, St George-Hyslop P, Hardy J, Bilbao J et al. 2006. Novel splicing mutation in the progranulin gene causing familial corticobasal syndrome. *Brain : a journal of neurology* **129**(Pt 11): 3115-3123.

Mead S. 2006. Prion disease genetics. *European journal of human genetics : EJHG* **14**(3): 273-281.

Mehta SG, Khare M, Ramani R, Watts GD, Simon M, Osann KE, Donkervoort S, Dec E, Nalbandian A, Platt J et al. 2013. Genotype-phenotype studies of VCP-associated inclusion body myopathy with Paget disease of bone and/or frontotemporal dementia. *Clinical genetics* **83**(5): 422-431.

Mellick GD, Siebert GA, Funayama M, Buchanan DD, Li Y, Imamichi Y, Yoshino H, Silburn PA, Hattori N. 2009. Screening PARK genes for mutations in early-onset Parkinson's disease patients from Queensland, Australia. *Parkinsonism & related disorders* **15**(2): 105-109.

Mitchell J, Paul P, Chen HJ, Morris A, Payling M, Falchi M, Habgood J, Panoutsou S, Winkler S, Tisato V et al. 2010. Familial amyotrophic lateral sclerosis is associated with a mutation in D-amino acid oxidase. *Proceedings of the National Academy of Sciences of the United States of America* **107**(16): 7556-7561.

Mules EH, Hayflick S, Miller CS, Reynolds LW, Thomas GH. 1992. Six novel deleterious and three neutral mutations in the gene encoding the alpha-subunit of hexosaminidase A in non-Jewish individuals. *American journal of human genetics* **50**(4): 834-841.

Munch C, Sedlmeier R, Meyer T, Homberg V, Sperfeld AD, Kurt A, Prudlo J, Peraus G, Hanemann CO, Stumm G et al. 2004. Point mutations of the p150 subunit of dynactin (DCTN1) gene in ALS. *Neurology* **63**(4): 724-726.

Murayama O, Tomita T, Nihonmatsu N, Murayama M, Sun X, Honda T, Iwatsubo T, Takashima A. 1999. Enhancement of amyloid beta 42 secretion by 28 different presenilin 1 mutations of familial Alzheimer's disease. *Neuroscience letters* **265**(1): 61-63.

Nelson O, Tu H, Lei T, Bentahir M, de Strooper B, Bezprozvanny I. 2007. Familial Alzheimer disease-linked mutations specifically disrupt Ca2+ leak function of presenilin 1. *The Journal of clinical investigation* **117**(5): 1230-1239.

Nygaard HB, Lippa CF, Mehdi D, Baehring JM. 2014. A Novel Presenilin 1 Mutation in Early-Onset Alzheimer's Disease With Prominent Frontal Features. *American journal of Alzheimer's disease and other dementias* **29**(5): 433-435.

Padhi AK, Kumar H, Vasaikar SV, Jayaram B, Gomes J. 2012. Mechanisms of loss of functions of human angiogenin variants implicated in amyotrophic lateral sclerosis. *PloS one* **7**(2): e32479.

Padhi AK, Vasaikar SV, Jayaram B, Gomes J. 2013. Fast prediction of deleterious angiogenin mutations causing amyotrophic lateral sclerosis. *FEBS letters* **587**(12): 1762-1766.

Palmer MS, Beck JA, Campbell TA, Humphries CB, Roques PK, Fox NC, Harvey R, Rossor MN, Collinge J. 1999. Pathogenic presenilin 1 mutations (P436S & I143F) in early-onset Alzheimer's disease in the UK. Mutations in brief no. 223. Online. *Human mutation* **13**(3): 256.

Paw BH, Moskowitz SM, Uhrhammer N, Wright N, Kaback MM, Neufeld EF. 1990. Juvenile GM2 gangliosidosis caused by substitution of histidine for arginine at position 499 or 504 of the alpha-subunit of beta-hexosaminidase. *The Journal of biological chemistry* **265**(16): 9452-9457.

Peoc'h K, Levavasseur E, Delmont E, De Simone A, Laffont-Proust I, Privat N, Chebaro Y, Chapuis C, Bedoucha P, Brandel JP et al. 2012. Substitutions at residue 211 in the prion protein drive a switch between CJD and GSS syndrome, a new mechanism governing inherited neurodegenerative disorders. *Human molecular genetics* **21**(26): 5417-5428.

Peoc'h K, Manivet P, Beaudry P, Attane F, Besson G, Hannequin D, Delasnerie-Laupretre N, Laplanche JL. 2000. Identification of three novel mutations (E196K, V203I, E211Q) in the prion protein gene (PRNP) in inherited prion diseases with Creutzfeldt-Jakob disease phenotype. *Human mutation* **15**(5): 482.

Piccini A, Zanusso G, Borghi R, Noviello C, Monaco S, Russo R, Damonte G, Armirotti A, Gelati M, Giordano R et al. 2007. Association of a presenilin 1 S170F mutation with a novel Alzheimer disease molecular phenotype. *Archives of neurology* **64**(5): 738-745.

Proukakis C, Dudzik CG, Brier T, MacKay DS, Cooper JM, Millhauser GL, Houlden H, Schapira AH. 2013. A novel alpha-synuclein missense mutation in Parkinson disease. *Neurology* **80**(11): 1062-1064.

Prudencio M, Hart PJ, Borchelt DR, Andersen PM. 2009. Variation in aggregation propensities among ALS-associated variants of SOD1: correlation to human disease. *Human molecular genetics* **18**(17): 3217-3226.

Rademakers R, Stewart H, Dejesus-Hernandez M, Krieger C, Graff-Radford N, Fabros M, Briemberg H, Cashman N, Eisen A, Mackenzie IR. 2010. Fus gene mutations in familial and sporadic amyotrophic lateral sclerosis. *Muscle & nerve* **42**(2): 170-176.

Raux G, Gantier R, Martin C, Pothin Y, Brice A, Frebourg T, Campion D. 2000. A novel presenilin 1 missense mutation (L153V) segregating with early-onset autosomal dominant Alzheimer's disease. *Human mutation* **16**(1): 95.

Rosen DR, Siddique T, Patterson D, Figlewicz DA, Sapp P, Hentati A, Donaldson D, Goto J, O'Regan JP, Deng HX et al. 1993. Mutations in Cu/Zn superoxide dismutase gene are associated with familial amyotrophic lateral sclerosis. *Nature* **362**(6415): 59-62.

Ross OA, Soto-Ortolaza AI, Heckman MG, Verbeeck C, Serie DJ, Rayaprolu S, Rich SS, Nalls MA, Singleton A, Guerreiro R et al. 2013. NOTCH3 variants and risk of ischemic stroke. *PloS one* **8**(9): e75035.

Sassi C, Guerreiro R, Gibbs R, Ding J, Lupton MK, Troakes C, Al-Sarraj S, Niblock M, Gallo JM, Adnan J et al. 2014. Investigating the role of rare coding variability in Mendelian dementia genes (APP, PSEN1, PSEN2, GRN, MAPT, and PRNP) in late-onset Alzheimer's disease. *Neurobiology of aging* **35**(12): 2881 e2881-2886.

Schulte EC, Mollenhauer B, Zimprich A, Bereznai B, Lichtner P, Haubenberger D, Pirker W, Brucke T, Molnar MJ, Peters A et al. 2012. Variants in eukaryotic translation initiation factor 4G1 in sporadic Parkinson's disease. *Neurogenetics* **13**(3): 281-285.

Sherrington R, Rogaev EI, Liang Y, Rogaeva EA, Levesque G, Ikeda M, Chi H, Lin C, Li G, Holman K et al. 1995. Cloning of a gene bearing missense mutations in early-onset familial Alzheimer's disease. *Nature* **375**(6534): 754-760.

Siepel A PK, Haussler D. 2006. New Methods for detecting lineage-specific selection. . In *Research in Computational Molecular Biology*, pp. 190-205. Springer.

Snider BJ, Norton J, Coats MA, Chakraverty S, Hou CE, Jervis R, Lendon CL, Goate AM, McKeel DW, Jr., Morris JC. 2005. Novel presenilin 1 mutation (S170F) causing Alzheimer disease with Lewy bodies in the third decade of life. *Archives of neurology* **62**(12): 1821-1830.

Sodeyama N, Iwata T, Ishikawa K, Mizusawa H, Yamada M, Itoh Y, Otomo E, Matsushita M, Komatsuzaki Y. 2001. Very early onset Alzheimer's disease with spastic paraparesis associated with a novel presenilin 1 mutation (Phe237Ile). *Journal of neurology, neurosurgery, and psychiatry* **71**(4): 556-557.

Spudich S, Mastrianni JA, Wrensch M, Gabizon R, Meiner Z, Kahana I, Rosenmann H, Kahana E, Prusiner SB. 1995. Complete penetrance of Creutzfeldt-Jakob disease in Libyan Jews carrying the E200K mutation in the prion protein gene. *Mol Med* **1**(6): 607-613.

Sriram SR, Li X, Ko HS, Chung KK, Wong E, Lim KL, Dawson VL, Dawson TM. 2005. Familial-associated mutations differentially disrupt the solubility, localization, binding and ubiquitination properties of parkin. *Human molecular genetics* **14**(17): 2571-2586.

Stockmann M, Meyer-Ohlendorf M, Achberger K, Putz S, Demestre M, Yin H, Hendrich C, Linta L, Heinrich J, Brunner C et al. 2013. The dynactin p150 subunit: cell biology studies of sequence changes found in ALS/MND and Parkinsonian syndromes. *Journal of neural transmission* **120**(5): 785-798.

Tanaka A, Hoang LT, Nishi Y, Maniwa S, Oka M, Yamano T. 2003. Different attenuated phenotypes of GM2 gangliosidosis variant B in Japanese patients with HEXA mutations at codon 499, and five novel mutations responsible for infantile acute form. *Journal of human genetics* **48**(11): 571-574.

Tapia L, Milnerwood A, Guo A, Mills F, Yoshida E, Vasuta C, Mackenzie IR, Raymond L, Cynader M, Jia W et al. 2011. Progranulin deficiency decreases gross neural connectivity but enhances transmission at individual synapses. *The Journal of neuroscience : the official journal of the Society for Neuroscience* **31**(31): 11126-11132.

Thiyagarajan N, Ferguson R, Subramanian V, Acharya KR. 2012. Structural and molecular insights into the mechanism of action of human angiogenin-ALS variants in neurons. *Nature communications* **3**: 1121.

van Blitterswijk M, van Es MA, Hennekam EA, Dooijes D, van Rheenen W, Medic J, Bourque PR, Schelhaas HJ, van der Kooi AJ, de Visser M et al. 2012a. Evidence for an oligogenic basis of amyotrophic lateral sclerosis. *Human molecular genetics* **21**(17): 3776-3784.

van Blitterswijk M, Vlam L, van Es MA, van der Pol WL, Hennekam EA, Dooijes D, Schelhaas HJ, van der Kooi AJ, de Visser M, Veldink JH et al. 2012b. Genetic overlap between apparently sporadic motor neuron diseases. *PloS one* **7**(11): e48983.

van der Zee J, Van Langenhove T, Kovacs GG, Dillen L, Deschamps W, Engelborghs S, Matej R, Vandenbulcke M, Sieben A, Dermaut B et al. 2014. Rare mutations in SQSTM1 modify susceptibility to frontotemporal lobar degeneration. *Acta neuropathologica* **128**(3): 397-410.

van Es MA, Diekstra FP, Veldink JH, Baas F, Bourque PR, Schelhaas HJ, Strengman E, Hennekam EA, Lindhout D, Ophoff RA et al. 2009. A case of ALS-FTD in a large FALS pedigree with a K17I ANG mutation. *Neurology* **72**(3): 287-288.

Vance C, Rogelj B, Hortobagyi T, De Vos KJ, Nishimura AL, Sreedharan J, Hu X, Smith B, Ruddy D, Wright P et al. 2009. Mutations in FUS, an RNA processing protein, cause familial amyotrophic lateral sclerosis type 6. *Science* **323**(5918): 1208-1211.

Walker ES, Martinez M, Brunkan AL, Goate A. 2005. Presenilin 2 familial Alzheimer's disease mutations result in partial loss of function and dramatic changes in Abeta 42/40 ratios. *Journal of neurochemistry* **92**(2): 294-301.

Wu CH, Fallini C, Ticozzi N, Keagle PJ, Sapp PC, Piotrowska K, Lowe P, Koppers M, McKenna-Yasek D, Baron DM et al. 2012. Mutations in the profilin 1 gene cause familial amyotrophic lateral sclerosis. *Nature* **488**(7412): 499-503.

Wu D, Yu W, Kishikawa H, Folkerth RD, Iafrate AJ, Shen Y, Xin W, Sims K, Hu GF. 2007. Angiogenin loss-of-function mutations in amyotrophic lateral sclerosis. *Annals of neurology* **62**(6): 609-617.

Wu YY, Cheng IH, Lee CC, Chiu MJ, Lee MJ, Chen TF, Hsu JL. 2011. Clinical phenotype of G206D mutation in the presenilin 1 gene in pathologically confirmed familial Alzheimer's disease. *Journal of Alzheimer's disease : JAD* **25**(1): 145-150.

Yan J, Deng HX, Siddique N, Fecto F, Chen W, Yang Y, Liu E, Donkervoort S, Zheng JG, Shi Y et al. 2010. Frameshift and novel mutations in FUS in familial amyotrophic lateral sclerosis and ALS/dementia. *Neurology* **75**(9): 807-814.

Yu CE, Bird TD, Bekris LM, Montine TJ, Leverenz JB, Steinbart E, Galloway NM, Feldman H, Woltjer R, Miller CA et al. 2010. The spectrum of mutations in progranulin: a collaborative study screening 545 cases of neurodegeneration. *Archives of neurology* **67**(2): 161-170.

Zhang W, Han SW, McKeel DW, Goate A, Wu JY. 1998. Interaction of presenilins with the filamin family of actin-binding proteins. *The Journal of neuroscience : the official journal of the Society for Neuroscience* **18**(3): 914-922.
