# Supplementary material for: Genetic compendium of 1511 human brains available through the UK Medical Research Council Brain Banks Network Resource
Source: HighWire-hosted journal article supplement (doi:10.1101/gr.210609.116), 2016-12-21
Supplement: Supplemental_Table_S1.docx [file Supplemental_Table_S1.docx]

|  | N | Age of onset (years) | | Age of death (years) | | Female | Male | FH of disease | |
| --- | --- | --- | --- | --- | --- | --- | --- | --- | --- |
|  |  | **Mean** | **SD** | **Mean** | **SD** | **N** | **N** | **Y** | **%** |
| AD and FTD | 1 |  |  | 73 |  | 0 | 1 | 0 | 0.0% |
| Adult onset gangliosidosis | 1 | 65 |  | 71 |  | 0 | 1 | 0 | 0.0% |
| Agyrophilic Grain Disease | 4 | 78 |  | 87.5 | 1.9 | 2 | 2 | 0 | 0.0% |
| Amyloid angiopathy | 1 |  |  | 84 |  | 1 | 0 | 0 | 0.0% |
| Ataxia | 1 | 85 |  | 85 |  | 1 | 0 | 1 | 100.0% |
| Atypical dementia not consistent with major classifications | 3 | 55 |  | 77.3 | 11 | 1 | 2 | 0 | 0.0% |
| Atypical Substantia Nigra degeneration | 2 | 79 |  | 83.5 | 2.1 | 1 | 1 | 0 | 0.0% |
| Atypical tauopathy | 3 | 75 | 13.1 | 85.3 | 12.5 | 1 | 2 | 0 | 0.0% |
| Atypical TDP-43 deposition | 1 | 76 |  | 83 |  | 1 | 0 | 0 | 0.0% |
| CADASIL | 1 | 40 |  | 62 |  | 0 | 1 | 1 | 100.0% |
| Corticobasal Degeneration and concomitant AD | 1 |  |  | 84 |  | 1 | 0 | 0 | 0.0% |
| Cerebello-olivary atrophy | 1 |  |  | 75 |  | 1 | 0 | 0 | 0.0% |
| Cerebello-olivary degeneration | 1 | 12 |  | 58 |  | 1 | 0 | 1 | 100.0% |
| Chorea-acanthocytosis | 1 |  |  | 40 |  | 0 | 1 | 0 | 0.0% |
| Chronic encephalopathy | 1 |  |  | 71 |  | 0 | 1 | 0 | 0.0% |
| Central Pontine Myelinolysis | 1 | 64 |  | 67 |  | 0 | 1 | 0 | 0.0% |
| Chronic Traumatic Encephalopathy | 1 |  |  | 69 |  | 0 | 1 | 0 | 0.0% |
| Demyelinating disorders | 2 |  |  | 43.5 | 13.4 | 1 | 1 | 0 | 0.0% |
| Epilepsy | 1 |  |  | 24 |  | 1 | 0 | 0 | 0.0% |
| Huntington Disease phenocopy | 1 | 40 |  | 62 |  | 1 | 0 | 1 | 100.0% |
| Hepatic encephalopathy | 1 |  |  | 52 |  | 1 | 0 | 0 | 0.0% |
| Kuf's disease | 1 | 43 |  | 58 |  | 0 | 1 | 0 | 0.0% |
| Lewy Body Disease – no clinical features | 2 |  |  | 90 | 0 | 2 | 0 | 0 | 0.0% |
| Learning difficulty and Epilepsy | 1 | 10 |  | 54 |  | 0 | 1 | 0 | 0.0% |
| Mild Cognitive Impairment | 1 |  |  | 85 |  | 0 | 1 | 0 | 0.0% |
| MELAS | 1 | 13 |  | 49 |  | 0 | 1 | 0 | 0.0% |
| Mitochondrial disease | 1 | 0 |  | 3 |  | 0 | 1 | 0 | 0.0% |
| Mixed Alzheimer Disease and Lewy Body Disease | 1 | 63 |  | 75 |  | 1 | 0 | 0 | 0.0% |
| Mixed Corticobasal degeneration and Dementia with Lewy Bodies | 1 | 79 |  | 77 |  | 0 | 1 | 0 | 0.0% |
| Multiple Sclerosis | 3 | 34.3 | 16.7 | 61.7 | 11.9 | 1 | 2 | 1 | 33.3% |
| Neocortical Lewy Body Disease – no clinical features | 1 |  |  | 73 |  | 0 | 1 | 0 | 0.0% |
| Neuroaxonal dystrophy | 1 | 14 |  | 16 |  | 1 | 0 | 0 | 0.0% |
| Neurofibribrillary tangle only dementia | 3 | 80.3 | 8 | 87.7 | 9.1 | 0 | 3 | 0 | 0.0% |
| Normal Pressure Hydrocephalus | 1 | 64 |  | 65 |  | 0 | 1 | 1 | 100.0% |
| Paraneoplastic encephalopathy | 1 |  |  | 66 |  | 0 | 1 | 0 | 0.0% |
| Parkinson’s Disease and Motor Neuron Disease | 1 |  |  |  |  | 0 | 1 | 0 | 0.0% |
| Parkinson’s disease related changes | 2 |  |  | 84.5 | 3.5 | 0 | 2 | 0 | 0.0% |
| Primary Familial Basal Ganglia Calcification | 2 | 75 |  | 76 | 2.8 | 2 | 0 | 0 | 0.0% |
| Possible Alzheimer Disease – clinical history unclear | 1 | 62 |  | 82 |  | 1 | 0 | 1 | 100.0% |
| Possible paraneoplastic dementia | 1 | 52 |  | 64 |  | 0 | 1 | 0 | 0.0% |
| Pre-clinical tauopathy | 1 |  |  | 68 |  | 0 | 1 | 0 | 0.0% |
| Pre-symptomatic Dementia with Lewy Bodies | 2 | 67 |  | 86.5 | 13.4 | 1 | 1 | 0 | 0.0% |
| Pre-symptomatic Frontotemporal dementia | 1 |  |  | 79 |  | 1 | 0 | 0 | 0.0% |
| Probable Alzheimer Disease | 4 | 84 |  | 86.3 | 6.1 | 2 | 2 | 0 | 0.0% |
| Spinocerebellar ataxia (SCA) | 1 |  |  | 50 |  | 0 | 1 | 0 | 0.0% |
| SCA1 | 1 |  |  | 76 |  | 0 | 1 | 0 | 0.0% |
| SCA14 | 1 |  |  | 103 |  | 0 | 1 | 1 | 100.0% |
| SCA2 | 2 |  |  | 68 | 18.4 | 1 | 1 | 1 | 50.0% |
| SCA7 | 1 |  |  | 58 |  | 1 | 0 | 0 | 0.0% |
| Spinal muscular atrophy | 1 |  |  |  |  | 1 | 0 | 0 | 0.0% |
| Superficial Siderosis | 1 | 63 |  | 72 |  | 1 | 0 | 0 | 0.0% |
| Tauopathy | 5 | 63 | 1.4 | 72.8 | 11.2 | 2 | 3 | 0 | 0.0% |
| Uncategorized dementia | 1 |  |  | 95 |  | 1 | 0 | 0 | 0.0% |
| Unusual tauopathy | 1 |  |  | 67 |  | 0 | 1 | 0 | 0.0% |
| Vascular disease / DLB | 1 | 90 |  | 91 |  | 1 | 0 | 0 | 0.0% |
|  |  |  |  |  |  |  |  |  |  |
| Total | **80** | **57.4** | **25.3** | **72.4** | **18.3** | **35** | **45** | **9** | **11.3%** |

**Supplemental Table S1.** All 80 cases included in the ‘other’ category within the study. Number of cases together with age of onset, death, sex and family history of disease are recorded.
