# Supplementary material for: Genetic compendium of 1511 human brains available through the UK Medical Research Council Brain Banks Network Resource
Source: HighWire-hosted journal article supplement (doi:10.1101/gr.210609.116), 2016-12-21
Supplement: Supplemental_Table_S2.docx [file Supplemental_Table_S2.docx]

| **Gene** | **Disease** | **Inheritance** |
| --- | --- | --- |
| SNCA | PD | AD/RF |
| PARK2 | PD | AR |
| PINK1 | PD | AR |
| EIF4G1 | PD | AD |
| GIGYF2 | PD | AD/RF |
| HTRA2 | PD | AD |
| UCHL | PD | AD |
| SPG11 | PD | AR |
| VPS35 | PD | AD |
| FBX07 | PD | AR |
| APP | AD | AD |
| PSEN1 | AD | AD |
| PSEN2 | AD | AD |
| c9orf72 | FTD / ALS | AD |
| GRN | FTD/AD | AD |
| CHCHD10 | FTD | AD |
| TARDBP | FTD | AD |
| SOD1 | ALS | AD/AR |
| FUS | ALS | AD |
| PFN1 | ALS | AD |
| hnRNPA2B1 | ALS | AD |
| hnRNPA1 | ALS | AD |
| SETX | ALS | AR |
| VAPB | ALS | AD |
| OPTN | ALS | AR |
| VCP | ALS | AD |
| DAO | ALS | AD |
| ANG | ALS | AD |
| DCTN1 | ALS | AD |
| PARK7 | PD | AR |
| CHMP2B | FTD/ALS | AD |
| SQSTM1 | FTD/ALS | AD/RF |
| PRPH | ALS | AD |
| DPP6 | ALS | AR |
| MATR3 | ALS | AD |
| MAPT | FTD | AD |
| ALS2 | ALS | AR |
| SIGMAR1 | ALS | AD |
| UBQLN2 | FTD | XLD |
| NOTCH3 | CADASIL | AD |
| PRNP | fCJD | AD |
| COQ2 | MSA | AD/AR |
| GBA | DLB | RF |
| LRRK2 | PD/DLB | RF |
| TREM2 | AD | RF |
| SCARB2 | DLB | RF |
| PON1 | ALS | RF |
| PON3 | ALS | RF |
| APOE | AD | RF |

**Supplemental Table S2.** Genes and inheritance patters causing their relevant neurodegenerative disease. Disease category; PD – Parkinson’s disease, AD – Alzheimer’s disease, FTD – Frontotemporal dementia, ALS – Amyotrophic lateral sclerosis. Inheritance; AD – Autosomal dominant, AR – Autosomal recessive, XLD – X-linked dominant, RF- Risk factor (dominant).
