# Supplementary material for: Genetic compendium of 1511 human brains available through the UK Medical Research Council Brain Banks Network Resource
Source: HighWire-hosted journal article supplement (doi:10.1101/gr.210609.116), 2016-12-21
Supplement: Supplemental_Table_S3.docx [file Supplemental_Table_S3.docx]

| **Gee** | **Mean sequencing depth of each gene (n=1461 samples)** | **Standard deviation of sequencing depth** | **Percentage of samples with < 10 fold mean sequencing depth** |
| --- | --- | --- | --- |
| ALS2 | 38.8 | 9.9 | 0 |
| ANG | 27.7 | 8.9 | 0.1 |
| APOE | 39.6 | 12.8 | 0 |
| APP | 44.1 | 11.4 | 0 |
| C9orf72 | 38 | 9.9 | 0 |
| CHCHD10 | 19.8 | 7.6 | 2.4 |
| CHMP2B | 50.3 | 16.4 | 0 |
| COQ2 | 54.1 | 13.8 | 0 |
| DAO | 51.1 | 14.1 | 0 |
| DCTN1 | 67.4 | 17 | 0 |
| DPP6 | 60.2 | 15.1 | 0 |
| EIF4G1 | 59 | 14.8 | 0 |
| FBXO7 | 42.9 | 10.8 | 0 |
| FUS | 43.6 | 11.1 | 0 |
| GIGYF2 | 49.8 | 12.8 | 0 |
| GBA | 42.4 | 11.5 | 0 |
| GRN | 73.6 | 20.8 | 0 |
| HNRNPA1 | 31.6 | 8.3 | 0.1 |
| HNRNPA2B1 | 72.3 | 19.4 | 0 |
| HTRA2 | 39.9 | 10.8 | 0 |
| LRRK2 | 43.7 | 12.5 | 0 |
| MAPT | 32.2 | 12 | 1.3 |
| MATR3 | 44.4 | 12.2 | 0 |
| Notch3 | 43.2 | 13.6 | 0 |
| OPTN | 65.1 | 16.7 | 0 |
| PARK2 | 59.1 | 15 | 0 |
| PARK7 | 35.1 | 9.9 | 0 |
| PFN1 | 44.5 | 12.1 | 0 |
| PINK1 | 52.3 | 13.9 | 0 |
| PON1 | 44.1 | 11.9 | 0 |
| PON3 | 42.5 | 11.5 | 0 |
| PRNP | 68.2 | 18.4 | 0 |
| PRPH | 73.2 | 20.2 | 0 |
| PSEN1 | 48.7 | 12.9 | 0 |
| PSEN2 | 57.9 | 15.9 | 0 |
| SETX | 43.4 | 10.9 | 0 |
| SIGMAR1 | 44.4 | 12.4 | 0 |
| SCARB2 | 47 | 10.9 | 0 |
| SNCA | 63.5 | 18.7 | 0 |
| SOD1 | 54.3 | 14.2 | 0 |
| SPG11 | 39.4 | 10.3 | 0 |
| VAPB | 50 | 7.4 | 0 |
| SQSTM1 | 59.6 | 16.7 | 0 |
| TARDBP | 39 | 10.6 | 0 |
| TREM2 | 55 | 16.3 | 0 |
| UBQLN2 | 25.9 | 11.1 | 0.9 |
| UCHL1 | 46 | 12.6 | 0 |
| VCP | 52.2 | 13.5 | 0 |
| VPS35 | 38.1 | 10.8 | 0 |
|  |  |  |  |
| **Mean sequencing depth** | **49.1** |  | **0.1** |
| **Standard deviation** | **13.8** |  |  |
| **Total percentage of samples in which mean coverage was below 10 fold in any gene** |  |  | **4.8** |

**Supplemental Table S3.** Mean coverage of CCDS regions within genes implicated as risk factors or causing familial forms of neurodegenerative disease.
