# Supplementary material for: Genetic compendium of 1511 human brains available through the UK Medical Research Council Brain Banks Network Resource
Source: HighWire-hosted journal article supplement (doi:10.1101/gr.210609.116), 2016-12-21
Supplement: Supplemental_Table_S4.docx [file Supplemental_Table_S4.docx]

| **Disease** | **Genes analysed by phenotype** | | | | | | | | | | | |
| --- | --- | --- | --- | --- | --- | --- | --- | --- | --- | --- | --- | --- |
| **Neurodegeneration with Brain Iron Accumulation (NBIA)** | C19orf12 | FA2H | PANK2 | PLA2G6 | WDR45 | PLA2 | ATP13A2 | COASY | CP | DCAF17 | SCP | FTL |
|  |  |  |  |  |  |  |  |  |  |  |  |  |
| **Infantile onset Mitochondrial disease** | BCS1L | CLEC4GP1 | CLEC4M | COX10 | COX15 | ECHS1 | FBN3 | FOXRED1 | GYG2 | IARS2 | LRPPRC | NDUFA10 |
|  | NDUFA12 | NDUFA2 | NDUFA9 | NDUFAF2 | NDUFAF5 | NDUFAF6 | NDUFS2 | NDUFS3 | NDUFS4 | NDUFS7 | NDUFS8 | PDHA1 |
|  | PDHB | PET100 | PRR36 | SDHA | SURF1 | TACO1 | TRAP1 | TRAPPC5 | TTC19 | AARS2 | ACAD8 | ACAD9 |
|  | ACO1 | ACO2 | AGK | AGTR1 | AIFM1 | AMACR | ANGEL2 | APOPT1 | ATP5A1 | ATP5E | ATPAF2 | BCS1L |
|  | BOLA3 | C10orf2 | C12orf65 | CHKB | CHRNA4 | CHRNA7 | CHRNB2 | CLEC4GP1 | CLEC4M | COA5 | COA6 | COX10 |
|  | COX14 | COX15 | COX20 | COX6B1 | CPS1 | CPT1A | CYC1 | DGUOK | DLAT | DLD | DNA2 | DNAH8 |
|  | DNM1L | EARS2 | ECHS1 | ECI1 | ECSIT | ELAC2 | EPHX1 | FARS2 | FASTKD2 | FBN3 | FOXRED1 | FXN |
|  | GAD1 | GALNS | GFER | GFM1 | GNPAT | GOLPH3 | GPAM | GYG2 | HFE | HMGCS2 | HNF1A | HOGA1 |
|  | IARS2 | IBA57 | IVD | LARS2 | LIPT1 | LRPPRC | LYRM4 | MCCC2 | MFF | MGST3 | MPC1 | MPV17 |
|  | MRPL3 | MRPL44 | MRPS16 | MRPS22 | MRRF | NARS2 | NDUFA1 | NDUFA10 | NDUFA11 | NDUFA12 | NDUFA13 | NDUFA2 |
|  | NDUFA3 | NDUFA4 | NDUFA4L2 | NDUFA5 | NDUFA6 | NDUFA7 | NDUFA8 | NDUFA9 | NDUFAB1 | NDUFAF1 | NDUFAF2 | NDUFAF3 |
|  | NDUFAF4 | NDUFAF5 | NDUFAF6 | NDUFAF7 | NDUFB1 | NDUFB10 | NDUFB11 | NDUFB2 | NDUFB3 | NDUFB4 | NDUFB5 | NDUFB6 |
|  | NDUFB7 | NDUFB8 | NDUFB9 | NDUFS1 | NDUFS2 | NDUFS3 | NDUFS4 | NDUFS5 | NDUFS6 | NDUFS7 | NDUFS8 | NDUFV1 |
|  | NDUFV2 | NDUFV3 | NFU1 | NIPSNAP1 | NIPSNAP3A | NPL | NUBPL | OPA1 | OPA3 | OXCT1 | PARS2 | PC |
|  | PCK2 | PDHA1 | PDHB | PDHX | PET100 | PHYH | PNPT1 | POLG | POLG2 | PPARG | PRR36 | PTCD1 |
|  | PUS1 | RMND1 | RRM2B | SCO1 | SCO2 | SDHA | SDHAF1 | SDHD | SFXN4 | SLC25A4 | SLC35G2 | SUGCT |
|  | SURF1 | TACO1 | TK2 | TMEM70 | TP53 | TRAP1 | TRAPPC2 | TRAPPC5 | TRMU | TSFM | TTC19 | TTPA |
|  | TUFM | TYMP | UQCC2 | UQCC3 | UQCR10 | UQCR11 | UQCRB | UQCRC1 | UQCRC2 | UQCRFS1 | UQCRH | UQCRQ |
|  | WFS1 | YARS2 |  |  |  |  |  |  |  |  |  |  |
|  |  |  |  |  |  |  |  |  |  |  |  |  |
| **Primary Familial Basal Ganglia Calcification (PFBGC)** | PDGFB | PDGFRB | SLC20A2 | XPR1 | SLC20A2 |  |  |  |  |  |  |  |
|  |  |  |  |  |  |  |  |  |  |  |  |  |
| **Spinal Muscular Atrophy (SMA)** | AARS | AR | ASAH1 | ATP7A | BICD2 | BSCL2 | C1QB | CHMP2B | CKB | CKM | CKMT1A/CKMT1B | CKMT2 |
|  | DCTN1 | DNAJB2 | DYNC1H1 | DYSF | ETV1 | FBLN5 | FBXO38 | GARS | GOT1 | GOT1L1 | GOT2 | GPT |
|  | GPT2 | HINT1 | HSPB1 | HSPB2 | HSPB3 | HSPB7 | HSPB8 | IGHMBP2 | LMNA | MFN2 | PLEKHG5 | POLG |
|  | REEP1 | RRM1 | RRM2 | RRM2B | SETX | SLC52A3 | SLC5A7 | SMAD2 | SMAD3 | SMN1/SMN2 | TARDBP | TRPV4 |
|  | UBA1 | VAPB |  |  |  |  |  |  |  |  |  |  |
|  |  |  |  |  |  |  |  |  |  |  |  |  |
| **Huntington’s disease phenocopy** | JPH3 | PRNP | TBP | XK | PARK2 | VPS13A |  |  |  |  |  |  |
|  |  |  |  |  |  |  |  |  |  |  |  |  |
| **Chorea-acanthocytosis** | XK | PARK2 | JPH3 | VPS13A |  |  |  |  |  |  |  |  |
|  |  |  |  |  |  |  |  |  |  |  |  |  |
| **Adult onset Gangliosidosis** | CFTR | GLB1 | GM2A | HEXA | HEXB | PSAP | S1PR3 | SPHK1 | UGCG |  |  |  |
|  |  |  |  |  |  |  |  |  |  |  |  |  |
| **Kuf’s disease** | CLN5 | CLN6 | CTSF | DNAJC5 | GRN | PPT1 |  |  |  |  |  |  |

**Supplemental Table S4**. A list of all genes specifically assessed for discrete rare phenotypic cases in the cohort (column 1 in table). Heterozygous and homozygous rare variants (as described in supplementary methods) in all genes within the table were assessed, together with homozygous variants only for the patient with infantile mitochondrial disease.
