# Supplementary material for: Genetic compendium of 1511 human brains available through the UK Medical Research Council Brain Banks Network Resource
Source: HighWire-hosted journal article supplement (doi:10.1101/gr.210609.116), 2016-12-21
Supplement: Supplemental_Table_S5.docx [file Supplemental_Table_S5.docx]

| Case number | Sex | Age onset (years/SD) | Age death (years/SD) | FH of disease | Clinical Diagnosis | Neuropathological diagnosis |
| --- | --- | --- | --- | --- | --- | --- |
| 46 | Female |  | 63 | N | MND | MND |
| 47 | Female |  | 43 | N | MND | MND |
| 48 | Male |  | 71 | N | MND | FTD-ALS |
| 49 | Female | 73 | 75 | N | Vascular dementia | FTD |
| 50 | Male |  | 63 | N | Parkinsonism | FTD |
| 51 | Female | 52 | 56 | N | Dementia - unspecified | FTD |
| 52 | Male | 63 | 64 | N | MND | MND |
| 53 | Male |  | 56 | N | Dementia - unspecified | FTD |
| 54 | Male | 57 | 60 | N | FTD-ALS | FTD-ALS |
| 55 | Female | 49 | 50 | Y | MND | MND |
| 56 | Male |  | 67 | N | MND | MND |
| 57 | Male |  | 60 | Y | FTD-ALS | FTD-ALS |
| 58 | Male |  | 55 | Y | MND | FTD-ALS |
| 59 | Male |  | 62 | Y | FTD-ALS | FTD-ALS |
| 60 | Male | 54 | 57 | N | MND | MND |
|  |  |  |  |  |  |  |
| Mean (SD) | **Male (75%)** | **58 (8.8)** | **60.1 (7.9)** | **Y (40%)** | |  |

**Supplemental Table S5.** Summary of the clinical and demographic data of all cases with a hexanucleotide repeat expansion in *C9orf72*. Key; FH – Family History. MND – Motor Neuron Disease, FTD – Frontotemporal Dementia, FTD-ALS – Frontotemporal dementia and Amyotrophic Lateral Sclerosis.
