# Supplementary material for: Genetic compendium of 1511 human brains available through the UK Medical Research Council Brain Banks Network Resource
Source: HighWire-hosted journal article supplement (doi:10.1101/gr.210609.116), 2016-12-21
Supplement: Supplemental_Table_S6.docx [file Supplemental_Table_S6.docx]

| **Case 1:** |  |  | **Case 2:** |  |  | **PI-HAT** | **Inferred relatedness** | **Results** |
| --- | --- | --- | --- | --- | --- | --- | --- | --- |
| **Age**  **Onset (years)** | **Age death (years)** | **Diagnosis** | **Age onset (years)** | **Age death (years)** | **Diagnosis** |  |  |  |
| N/A | 58 | SCA7 | N/A | 50 | SCA - molecular diagnosis unknown | 0.5637 | 1st degree relative | SCA7 expansion confirmed in case 2 |
| N/A | 43 | MND | N/A | 42 | MND | 0.4797 | 1st degree relative | SOD1 variant (p.D102N) confirmed in both |
| N/A | 68 | AD | N/A | 64 | AD | 0.2234 | 2nd degree | Relationship confirmed through clinical note review. No familial allele or RF identified |
| N/A | 89 | Control (High Braak) – Braak stage 4 | N/A | 90 | Other; Lewy body disease (extensive neocortical Lewy bodies and parenchymal amyloid) | 0.4827 | 1st degree relative | No risk factor or familial cause identified |
| N/A | 82 | Control (BNE-stage 1) | N/A | 83 | DLB | 0.4689 | 1st degree relative | No risk factor or familial cause identified |
| N/A | 24 | Other: Epilepsy | N/A | 45 | Sporadic CJD | 0.2395 | 2nd degree | No risk factor or familial cause identified |
| N/A | 85 | Control (Braak < 2) | N/A | 39 | MND | 0.0823 | 3-4th degree | No risk factor or familial cause identified |
| N/A | 89 | PSP | N/A | 77 | Sporadic CJD | 0.0673 | 4th degree | No risk factor or familial cause identified |
| N/A | 83 | AD | N/A | 50 | MND | 0.0659 | 4th degree | No risk factor or familial cause identified |

**Supplemental Table S6.** Cases with cryptic ancestry from Identity By Descent (IBD). A summary of the clinical and pathological diagnosis is provided for each case together with the Pi-Hat score (see methods), and the subsequent inferred degree of relatedness based on that score. The results of the diagnostic outcome in relation to this information is provided in the results column.
