# Supplementary material for: Genetic compendium of 1511 human brains available through the UK Medical Research Council Brain Banks Network Resource
Source: HighWire-hosted journal article supplement (doi:10.1101/gr.210609.116), 2016-12-21
Supplement: Supplemental_Table_S7.docx [file Supplemental_Table_S7.docx]

| **Case** | **Diagnosis** | **Age onset** | **Age death** | **Gene** | **Chromosome** | **Start position** | **End position** | **width (bases)** | **Copy number change** |
| --- | --- | --- | --- | --- | --- | --- | --- | --- | --- |
| Case 61 | Alzheimer’s disease |  | 59 | *APP* | 21 | 26982980 | 28168090 | 1185111 | 3 |
| Case62 | Alzheimer’s disease | - | 79 | *PRPH* | 12 | 49676010 | 49689404 | 13395 | 3 |
| Case 63 | Alzheimer’s disease | - | 85 | *PRPH* | 12 | 49676010 | 49689404 | 13395 | 3 |
| Case 64 | Alzheimer’s disease | 58 | 69 | *PRPH* | 12 | 49676010 | 49689404 | 13395 | 3 |
| Case 65 | Alzheimer’s disease | - | 77 | *PRPH* | 12 | 49676010 | 49689404 | 13395 | 3 |
| Case 66 | Alzheimer’s disease | 83 | 92 | *PRPH* | 12 | 49676010 | 49689404 | 13395 | 3 |
| Case 67 | Alzheimer’s disease | - | 92 | *PRPH* | 12 | 49676010 | 49691567 | 15558 | 3 |
| Case 68 | Control | - | 60 | *PRPH* | 12 | 49676010 | 49689404 | 13395 | 3 |
| Case 69 | Atypical tauopathy with AD features | 64 | 80 | *PRPH* | 12 | 49676010 | 49689404 | 13395 | 3 |
| Case 70 | Motor Neuron Disease | - | 83 | *PRPH* | 12 | 49676010 | 49691225 | 15216 | 3 |
| Case 71 | Alzheimer’s disease | - | 82 | *DAO* | 12 | 109294301 | 109309971 | 15671 | 3 |
| Case 72 | Control (Braak 1) |  | 74 | *APOE* | 19 | 45412040 | 45414451 | 2412 | 3 |
| Case 73 | Sporadic CJD | 73 | 73 | *SPG11* | 15 | 44890903 | 44967847 | 76944 | 3 |
| Case 74 | Alzheimer’s disease | - | 72 | *SCARB2* | 4 | 77033590 | 77105700 | 72110 | 3 |
| Case 75 | Psychiatric disorder (possible NBIA at post-mortem) | 18 | 85 | *PARK2* | 6 | 161815583 | 161859655 | 44073 | 1 |
| Case 76 | Motor Neuron Disease | - | 53 | *PARK2* | 6 | 161815583 | 161859655 | 44073 | 1 |
| Case 77 | Sporadic CJD | 72 | 73 | *PARK2* | 6 | 161817168 | 161980513 | 163346 | 1 |
| Case 78 | Frontotemporal Dementia | - | 65 | *PARK2* | 6 | 162426517 | 162447612 | 21096 | 1 |
| Case 79 | Alzheimer’s disease | - | 58 | *LRRK2* | 12 | 40745181 | 40757533 | 12353 | 1 |

**Supplemental Table S7.** Rare copy number variants (CNVs, present in <1% of reference databases) and spanning all genes previously associated with neurodegenerative disorders are shown. Clinical details (diagnosis, age of disease onset, age of death) of each patient together with the start and end positions of the CNV, copy number change, and associated disease gene within the CNV.
