# Supplementary material for: Genetic compendium of 1511 human brains available through the UK Medical Research Council Brain Banks Network Resource
Source: HighWire-hosted journal article supplement (doi:10.1101/gr.210609.116), 2016-12-21
Supplement: Supplemental_Table_S8.docx [file Supplemental_Table_S8.docx]

| **Disease** | **Gene** | **(SKAT-0)** | **Cases (%)** | **Cont (%)** | **cDNA pos** | **AA change** | **1000G (MAF) %** | **ESP 6500 (MAF) %** | **Case (n)** | **Cont (n)** | **X2** | **OR** | **95% CI** | **Association** | **Study** | **Risk Factor** |
| --- | --- | --- | --- | --- | --- | --- | --- | --- | --- | --- | --- | --- | --- | --- | --- | --- |
| **AD** | TREM2 | p=0.017 | 20 (7%) | 8 (3%) | c.668C>T | p.T223I | 0.14 | 0.05 | 0 | 1 | 0.48 |  | - | Seen in a single AD case previously | ([Cuyvers et al. 2014](#_ENREF_10)) |  |
|  |  |  |  |  |  |  |  | 0 | 1 | 0 | 1.0 | - | - | None |  |  |
|  |  |  |  |  | c.407G>A | p.R136W |  | 0.02 | 0 | 1 | 0.48 | - | - | Seen in a single case previously | ([Jin et al. 2014](#_ENREF_17)) |  |
|  |  |  |  |  | c.292C>T | p.R98W | 0.02 | 0.01 | 1 | 0 | 1.0 | - | - | Strong association with AD ([CI], 2.77 - 9.16); P = 9.0×10−9] | ([Guerreiro et al. 2013](#_ENREF_15)) | Y |
|  |  |  |  |  | c.259G>A | p.D87N | 0.06 | 0.09 | 0 | 1 | 0.48 | - | - | Not reported |  |  |
|  |  |  |  |  | c.185G>A | p.R62H | 0.5 | 0.78 | 12 | 5 | 0.14 | 2.2 | 0.72-8.3 | Confers a significantly increased risk of disease (P = 2.36 × 10−4, OR = 2.36 (1.47–3.80) in 2082 cases and 1648 controls. | ([Jin et al. 2014](#_ENREF_17)) | Y |
|  |  |  |  |  | c.140G>A | p.R47H | 0.2 | 0.18 | 7 | 0 | 0.015 | - | - | Strong association with AD (p = 2.93×10(-17)) | ([Cuyvers et al. 2014](#_ENREF_10)) | Y |
|  | APOE | p=0.17 | 5 (1%) | 2 (0%) | c.137T>C | p.L46P | 0.08 | 0.12 | 3 | 1 | 0.63 | 2.7 | 0.2-145 | Significant risk of AD (13.2 (3.12-55.9) | ([Kamboh et al. 1999](#_ENREF_18)) | Y |
|  |  |  |  |  | c.761T>A | p.V254E |  | 0.08 | 1 | 0 | 1.0 | - | - | Not reported |  |  |
|  |  |  |  |  | c.805C>G | p.R269G |  |  | 0 | 1 | 0.48 | - | - | Novel |  |  |
|  |  |  |  |  | c.895G>C | p.E299Q |  | 0 | 1 | 0 | 1.0 | - | - | Novel |  |  |
|  |  |  |  |  |  |  |  |  |  |  |  |  |  |  |  |  |
| **DLB** | GBA | 0.0075 | 8 (13%) | 10 (4%) | c.1301T>C; | p.L483P; | 0.34 | 0.03 | 3 | 0 | 0.0068 | - | - | Significant risk factor for PD (11.68 (5.23,26.06) | ([Chen et al. 2014](#_ENREF_6)) | Y |
|  |  |  |  |  | c.962C>T; | p.T321M | 0.18 | 0.52 | 3 | 2 | 0.05 | 6.6 | 0.73-80 | Seen in 9% of PD patients and only 0.5% of controls previously, with an OR . 6.97,  95% CI 0.93–52.02; (P . 0.03) | ([Seto-Salvia et al. 2012](#_ENREF_31)) ([Lesage et al. 2011](#_ENREF_20)) | Y |
|  |  |  |  |  | c.946G>A; | p.E365K; | 0.5 | 0.89 | 1 | 7 | 1 | 0.61 | 0.01-4.8 | OR, 2.97; 95% CI: 1.3-6.4 for PD | ([Duran et al. 2013](#_ENREF_12)) | Y |
|  |  |  |  |  | c.665C>A; | p.A271D | 0 | 0 | 1 | 0 | 0.19 | - | - | Novel variant |  |  |
|  |  |  |  |  | c.-146-596C>G | p.S24R | 0 | 0 | 0 | 1 | 1 | - | -- | Novel variant |  |  |
|  | APOE | 0.759 | 0 (0%) | 2 (0%) | c.137T>C; | p.L46P; | 0.08 | 0.12 | 0 | 1 | 1 | - | - | Significant risk of AD (OR 3.2 (CI; 3.12-55.9) | ([Kamboh et al. 1999](#_ENREF_18)) | Y |
|  |  |  |  |  | c.883C>G | p.R295G | 0 | 0 | 0 | 1 | 1 | - | - | Not reported |  |  |
|  | TREM2 | 0.0084 | 7 (12%) | 8 (3%) | c.483-101C>T | p.T223I | 0.14 | 0.05 | 0 | 1 | 1 | - | - | Seen in a single AD case previously | ([Cuyvers et al. 2014](#_ENREF_10)) |  |
|  |  |  |  |  | c.407G>A | p.R136Q | 0 | 0.02 | 0 | 1 | 1 | - | - | Seen in a single case previously | ([Jin et al. 2014](#_ENREF_17)) |  |
|  |  |  |  |  | c.259G>A | p.D87N | 0.06 | 0.09 | 0 | 1 | 1 | - | - | Not reported |  |  |
|  |  |  |  |  | c.185G>A | p.R62H | 0.5 | 0.78 | 7 | 5 | 0.0024 | 3.2 | 1.7-27 | Not reported in association with DLB, but reported with AD (see above) | ([Jin et al. 2014](#_ENREF_17)) | Y |
|  | LRRK2 | 0.821 | 8 (13%) | 46 (19%) | c.368C>G | p.T123R | 0 | 0 | 1 | 0 | 0.19 | - | - | Novel variant |  |  |
|  |  |  |  |  | c.518A>G | p.N173S | 0 | 0 | 0 | 1 | 1 | - | - | Seen in 1 PD case | ([Pihlstrom et al. 2014](#_ENREF_27)) |  |
|  |  |  |  |  | c.1000G>A | p.E334K | 0.14 | 0.07 | 0 | 1 | 1 | - | - | Significance unknown | ([Ross et al. 2011](#_ENREF_29)) |  |
|  |  |  |  |  | c.1095C>A | p.H365Q | 0 | 0 | 0 | 1 | 1 | - | - | Novel variant |  |  |
|  |  |  |  |  | c.2189T>C | p.L730P | 0 | 0 | 0 | 1 | 1 | - | - | Novel variant |  |  |
|  |  |  |  |  | c.2611A>G | p.K871E | 0 | 0 | 0 | 1 | 1 | - | - | Significance unknown | ([Ross et al. 2011](#_ENREF_29)) |  |
|  |  |  |  |  | c.4165G>A | p.V1389I | 0 | 0.02 | 0 | 1 | 1 | - | - | Not reported |  |  |
|  |  |  |  |  | c.4541G>A | p.R1514Q | 0.16 | 0.52 | 0 | 2 | 1 | - | - | OR 1.13 (0.85, 1.49) | ([Ross et al. 2011](#_ENREF_29)) |  |
|  |  |  |  |  | c.4624C>T | p.P1542S | 1.32 | 2.34 | 2 | 17 | 0.55 | 0.5 | 0.05-2.1 | OR 0.90 (0.77, 1.06) | ([Ross et al. 2011](#_ENREF_29)) |  |
|  |  |  |  |  | c.4894G>C | p.E1632Q | 0 | 0 | 1 | 0 | 0.20 | - | - | Novel |  |  |
|  |  |  |  |  | c.4937T>C | p.M1646T | 0.48 | 1.13 | 2 | 8 | 1 | 1.06 | 0.11-5.5 | OR 1.43 (1.15, 1.78) (p=0.0012) | ([Ross et al. 2011](#_ENREF_29)) | Y |
|  |  |  |  |  | c.5183G>T | p.R1728L | 0 | 0.01 | 0 | 1 | 1 | - | - | Not reported |  |  |
|  |  |  |  |  | c.6185_6189delTACTC | p.L2063* | 0 | 0 | 0 | 1 | 1 | - | - | Novel |  |  |
|  |  |  |  |  | c.6241A>G | p.N2081D | 0.98 | 1.35 | 2 | 10 | 1 | 0.86 | 0.09-4.1 |  |  |  |
|  |  |  |  |  | c.6902T>C | p.M2301T | 0 | 0 | 0 | 1 | 1 | - | - | Novel |  |  |
|  |  |  |  |  | c.7151G>T | p.C2384F | 0 | 0 | 0 | 1 | 1 | - | - | Novel |  |  |
|  |  |  |  |  | c.7430G>A | p.R2477Q | 0.02 | 0.02 | 0 | 1 | 1 | - | - | Novel |  |  |
|  | SNCA | 0.58 | 1 (0%) | 1 (0%) | c.150T>G | p.H50Q | 0 | 0.01 | 0 | 1 | 1 | - | - | Previously described as familial cause of disease |  |  |
|  | SCARB2 | 0.077 | 2 (0%) | 4 (1%) | c.475A>G; | p.M159V | 0.38 | 0.86 | 0 | 3 | 1 | - | - | Not reported |  |  |
|  |  |  |  |  | ; c.445G>A | p.V149M | 0.1 | 0.25 | 0 | 1 | 1 | - | - | Not reported |  |  |
|  |  |  |  |  |  |  |  |  |  |  |  |  |  |  |  |  |
| **FTD-ALS** | SQSTM1 | 0.0076 | 29 (13%) | 16 (7%) | c.70A>G | p.S24G | 0 | 0 | 0 | 1 | 1.00 | - | - | Novel |  |  |
|  |  |  |  |  | c.85C>T | p.P29S | 0 | 0 | 1 | 0 | 0.47 | - | - | Novel |  |  |
|  |  |  |  |  | c.98C>T | p.A33V | 0 | 0.05 | 0 | 2 | 0.50 | - | - | Seen in equal proportion of cases and controls | ([van der Zee et al. 2014](#_ENREF_34)) |  |
|  |  |  |  |  | c.350C>T; | p.A117V | 0.08 | 0.08 | 0 | 1 | 1.00 | - | - | Seen in equal proportion of cases and controls | ([van der Zee et al. 2014](#_ENREF_34)) |  |
|  |  |  |  |  | c.100C>T; | p.P34S | 0 | 0.01 | 1 | 0 | 0.47 | - | - | Seen in equal proportion of cases and controls | ([van der Zee et al. 2014](#_ENREF_34)) |  |
|  |  |  |  |  | c.163C>T | p.R55C | 0 | 0 | 1 | 0 | 0.47 | - | - | Novel |  |  |
|  |  |  |  |  | c.373C>T | p.R125C | 0 | 0 | 1 | 0 | 0.47 | - | - | Novel |  |  |
|  |  |  |  |  | c.431C>T | p.P144L | 0 | 0.04 | 1 | 0 | 0.47 | - | - | Previously reported in 2 cases | ([van der Zee et al. 2014](#_ENREF_34)) |  |
|  |  |  |  |  | c.460A>G | p.K154E | 0.24 | 0.26 | 6 | 1 | 0.06 | 6.84 | 0.81-314 | Seen in 23 of 2203 patients and 14 of 3899 cases | ([van der Zee et al. 2014](#_ENREF_34)) |  |
|  |  |  |  |  | c.503G>T; | p.G168V | 0 | 0 | 0 | 1 | 1.00 | - | - | Novel |  |  |
|  |  |  |  |  | c.570G>C | p.E190D | 0.9 | 1.87 | 12 | 8 | 0.26 | 1.76 | 0.62-4.9 | Seen in 131 of 2203 cases and 79 of 3899 controls | ([van der Zee et al. 2014](#_ENREF_34)) |  |
|  |  |  |  |  | c.709C>T | p.R237C | 0.9 | 1.1 | 1 | 2 | 1.00 | 0.56 | 0.01-10.7 | Seen in 4 of 2203 cases and 1 of 3899 controls | ([van der Zee et al. 2014](#_ENREF_34)) |  |
|  |  |  |  |  | c.1175C>T; | p.P392L | 0.24 | 0.15 | 4 | 0 | 0.05 | - | - | Seen in 18 of 2203 cases and 11 of 3899 controls | ([van der Zee et al. 2014](#_ENREF_34)) |  |
|  |  |  |  |  | c.1279G>A | p.A427T | 0 | 0 | 1 | 0 | 0.47 | - | - | Novel – considered likely pathogenic in this study |  |  |
|  | CHMP2B | 0.1136 | 2(0) | 0(0) | c.83G>A | p.R28Q | 0 | 0.02 | 1 | 0 | 0.47 | - | - | Seen previously in one PLS case | [[83](#_ENREF_83)] |  |
|  |  |  |  |  | c.458C>T | p.S153L | 0 | 0.02 | 1 | 0 | 0.47 | - | - | Seen in cases and controls previously | [[83](#_ENREF_83)] |  |
|  | PON1 | 0.41 | 5 (2%) | 5 (2%) | c.977C>G | p.T326R | 0 | 0 | 1 | 0 | 0.47 | - | - | Novel |  |  |
|  |  |  |  |  | c.602C>T | p.A201V | 0.08 | 0.2 | 2 | 3 | 1.00 | 0.75 | 0.06-6.5 | Seen in 7 of 1444 cases and 3 of 1159 controls | ([Ticozzi et al. 2010](#_ENREF_33)) |  |
|  |  |  |  |  | c.55A>G | p.N19D | 0.1 | 0.16 | 2 | 2 | 1.00 | 1.1 | 0.08-15 | Seen in 8 of 1444 cases and 3/1159 controls | [[142](#_ENREF_142)] |  |
|  | PON2 | 0.23 | 4 (1%) | 4 (1%) | c.896C>A | p.P299H | 0 | 0 | 0 | 1 | 1.00 | - | - | Novel |  |  |
|  |  |  |  |  | c.304A>G | p.I102V | 0 | 0 | 1 | 0 | 0.47 | - | - | Novel |  |  |
|  |  |  |  |  | c.286delA | p.R96fs*5 | 0 | 0 | 2 | 1 | 0.61 | 2.24 | 0.12-132 | Seen in 7 of 1444 cases and 4/1159 controls | ([Ticozzi et al. 2010](#_ENREF_33)) |  |
|  |  |  |  |  | c.248G>A | p.G83E | 0.02 | 0 | 1 | 0 | 0.47 | - | - | Novel |  |  |
|  | PON3 | 0.4 | 3 (1%) | 3 (1%) | c.971G>A | p.G324D | 0.16 | 0.23 | 2 | 0 | 0.22 | - | - | Seen in 3 of 1444 cases and 3/1159 controls | [142](#_ENREF_142)] |  |
|  |  |  |  |  | c.436G>A | p.E146K | 0.28 | 0.35 | 0 | 1 | 1.00 | - | - | Not previously reported |  |  |
|  |  |  |  |  | c.94C>T | p.R32* | 0.12 | 0.17 | 1 | 2 | 1.00 | 0.56 | 0.01-11 | Not previously reported |  |  |
|  | GRN | 0.19 | 13 (5) | 10 (4%) | c.970G>A | p.A324T | 0.1 | 0.14 | 0 | 1 | 1.00 | - | - | Not associated with AD | ([Sassi et al. 2014](#_ENREF_30)) |  |
|  |  |  |  |  | c.1211G>T | p.C404F | 0 | 0 | 1 | 0 | 0.47 | - | - | Possibly pathogenic |  |  |
|  |  |  |  |  | c.1297C>T | p.R433W | 0.16 | 0.22 | 1 | 1 | 1.00 | 1.11 | 0.01-87 | Previously reported in a single patient | ([Guerreiro et al. 2010](#_ENREF_16)) |  |
|  |  |  |  |  | c.1354delG | p.V452fs*39 | 0 | 0 | 1 | 0 | 0.47 | - | - | Considered to be a likely pathogenic variant |  |  |
|  |  |  |  |  | c.1544G>C | p.G515A | 0.54 | 1.01 | 0 | 1 | 1.00 | - | - | Suggested previously to be pathogenic | ([Cruchaga et al. 2012](#_ENREF_9)) |  |
|  |  |  |  |  | c.1762G>T | p.A588S | 0 | 0 | 10 | 7 | 0.46 | 1.66 | 0.54-5.8 |  |  |  |
|  | PFN1 | 0.24 | 1 (0) | 0 (0) | c.350_351delAAinsGT | p.E117G | 0 | 0 | 1 | 0 | 0.47 | - | - | Confers an Odds ratio of disease of 2.44 | ([Fratta et al. 2014](#_ENREF_13)) | Y |

**Supplemental Table S8.** Variants in known risk-factor genes. Variants with a MAF <3% in either the 1000G or ESP6500 were selected. Statistical association through a case-burden test was performed at the gene level using SKAT-O for genes known to act as risk factors for each disease. Subsequent analysis at the variant level was performed using Chi-squared testing. Odds ratios were calculated where Chi-squared were p-values were significant (p<0.05). Variants were defined as risk factors where either previous large cohort sequencing studies or metanalysis provided statistical evidence of an association with disease, or where it was present within this study (identified by ‘Y’ in final column).
