# Supplementary material for: Genetic compendium of 1511 human brains available through the UK Medical Research Council Brain Banks Network Resource
Source: HighWire-hosted journal article supplement (doi:10.1101/gr.210609.116), 2016-12-21
Supplement: Supplemental_Table_S9.docx [file Supplemental_Table_S9.docx]

| **Disease Cohort** | **2/2**  **(n (%))** | **2/3**  **(n (%))** | **2/4**  **(n (%))** | **3/3**  **(n (%))** | **3/4**  **(n (%))** | **4/4**  **(n (%))** | **Total cohort in study** | **Total with APOE genotyping** |
| --- | --- | --- | --- | --- | --- | --- | --- | --- |
| **AD** | 0 (0.0) | 11 (4.0) | 9 (3.3) | 85 (31.3) | 120 (44.1) ** | 47 (17.3)  ** | 289 | 272 |
| **CBD** | 0 (0.0) | 1 (7.1) | 0 (0) | 9 (64.3) | 4 (28.6) | 0 (0) | 14 | 14 |
| **CJD** | 3 (1.3) | 28 (12.2) | 2 (0.9) | 130 (56.5) | 64 (27.8) | 3 (1.3) | 239 | 230 |
| **Control** | 3 (0.8) | 42 (11.7) | 12 (3.3) | 213 (59.3) | 83 (23.1) | 6 (1.7) | 369 | 359 |
| **Control (High Braak)** | 0 (0.0) | 3 (8.3) | 0 (0) | 24 (66.7) | 9 (25) | 0 (0) | 38 | 36 |
| **DLB** | 0 (0.0) | 1 (1.8) | 1 (1.8) | 24 (43.6) | 25 (45.5) * | 4 (7.3) * | 58 | 55 |
| **FTD-ALS** | 2 (0.8) | 18 (7.3) | 10 (4.1) | 140 (57.1) | 68 (27.8) | 7 (2.9) | 251 | 245 |
| **HD** | 0 (0.0) | 3 (42.9) | 1 (14.3) | 3 (42.9) | 0 (0) | 0 (0) | 7 | 7 |
| **MSA** | 0 (0.0) | 0 (0.0) | 0 (0) | 5 (50) | 5 (50) | 0 (0) | 10 | 10 |
| **Other** | 1 (1.4) | 13 (17.8) | 2 (2.7) | 35 (47.9) | 18 (24.7) | 4 (5.5) | 80 | 73 |
| **PD** | 0 (0.0) | 4 (10.5) | 0 (0) | 17 (44.7) | 16 (42.1) | 1 (2.6) | 39 | 38 |
| **PSP** | 0 (0.0) | 2 (11.8) | 0 (0) | 15 (88.2) | 0 (0) | 0 (0) | 17 | 17 |
| **Vascular disease** | 1 (1.6) | 10 (15.9) | 1 (1.6) | 31 (49.2) | 20 (31.7) | 0 (0) | 65 | 63 |
| **Vascular disease / AD** | 0 (0.0) | 0 (0.0) | 0 (0) | 5 (35.7) | 7 (50) | 2 (14.3) | 17 | 14 |
| **Vascular disease / Control** | 0 (0.0) | 2 (11.1) | 1 (5.6) | 14 (77.8) | 1 (5.6) | 0 (0) | 18 | 18 |
| **Total** | 10 | 138 | 39 | 750 | 440 | 74 | 1511 | 1451 |

**Supplemental Table S9.** *APOE* genotype of all cases within the study. Genotype was inferred from rs729358 and rs7412 SNVs. In total 1451 cases were successfully genotyped. The total number of cases for each genotype in each disease group and the percentage of that disease group are given (n,%). Associations between disease cohort and *APOE* genotype were performed for AD, FTD-ALS, and DLB vs controls (Chi-squared testing). **p<0.0001, *P<0.001
