# Supplementary material for: Genetic compendium of 1511 human brains available through the UK Medical Research Council Brain Banks Network Resource
Source: HighWire-hosted journal article supplement (doi:10.1101/gr.210609.116), 2016-12-21
Supplement: Supplemental_Table_S10.docx [file Supplemental_Table_S10.docx]

|  | AD vs All controls | | | | | | FTD-ALS vs All controls | | | | | | CJD vs All controls | | | | | | DLB vs All controls | | | | | |
| --- | --- | --- | --- | --- | --- | --- | --- | --- | --- | --- | --- | --- | --- | --- | --- | --- | --- | --- | --- | --- | --- | --- | --- | --- |
|  | V | Cases (n) | % case | Cont (n) | % cont | SKAT0 (p-value) | V | Cases (n) | % case | Cont (n) | % cont | SKAT0 (p-value) | V | Cases (n) | % case | Cont (n) | % cont | SKAT0 (p-value) | V | Cases (n) | % case | Cont (n) | % cont | SKAT0 (p-value) |
| **GBA** | 7 | 14 | 5.2 | 15 | 3.9 | 0.1678 | 9 | 12 | 5.5 | 15 | 3.9 | 0.2475 | 7 | 5 | 2.3 | 6 | 1.6 | 0.1621 | 7 | 8 | 13.8 | 15 | 3.9 | 0.0047 |
| **GRN** | 8 | 16 | 6.0 | 12 | 3.2 | 0.0329 | 8 | 13 | 5.9 | 12 | 3.2 | 0.0624 | 8 | 6 | 2.7 | 11 | 2.9 | 0.4927 | 8 | 7 | 12.1 | 12 | 3.2 | 0.0050 |
| **LRRK2** | 32 | 44 | 16.5 | 75 | 19.7 | 0.8938 | 30 | 43 | 19.5 | 77 | 20.3 | 0.6196 | 20 | 18 | 8.2 | 36 | 9.5 | 0.6779 | 24 | 8 | 13.8 | 77 | 20.3 | 0.8559 |
| **PFN1** | 1 | 1 | 0.4 | 1 | 0.3 | 0.3797 | 1 | 1 | 0.5 | 1 | 0.3 | 0.3686 | 3 | 3 | 1.4 | 1 | 0.3 | 0.0862 | 1 | 0 | 0.0 | 1 | 0.3 | 0.5430 |
| **PON1** | 2 | 4 | 1.5 | 6 | 1.6 | 0.5260 | 3 | 5 | 2.3 | 6 | 1.6 | 0.2752 | 2 | 6 | 2.7 | 6 | 1.6 | 0.2070 | 2 | 0 | 0.0 | 6 | 1.6 | 0.7953 |
| **PON2** | 4 | 2 | 0.7 | 2 | 0.5 | 0.4316 | 4 | 4 | 1.8 | 2 | 0.5 | 0.0788 | 2 | 0 | 0.0 | 2 | 0.5 | 0.7891 | 3 | 1 | 1.7 | 2 | 0.5 | 0.2040 |
| **PON3** | 4 | 3 | 1.1 | 6 | 1.6 | 0.6645 | 5 | 4 | 1.8 | 6 | 1.6 | 0.4570 | 6 | 3 | 1.4 | 6 | 1.6 | 0.5489 | 4 | 1 | 1.7 | 6 | 1.6 | 0.4654 |
| **SCARB2** | 5 | 7 | 2.6 | 8 | 2.1 | 0.3089 | 8 | 7 | 3.2 | 8 | 2.1 | 0.2254 | 4 | 6 | 2.7 | 8 | 2.1 | 0.2544 | 4 | 0 | 0.0 | 8 | 2.1 | 0.7891 |
| **SNCA** | 1 | 0 | 0.0 | 1 | 0.3 | 0.6918 | 2 | 1 | 0.5 | 1 | 0.3 | 0.4226 | 1 | 0 | 0.0 | 1 | 0.3 | 0.6779 | 1 | 0 | 0.0 | 1 | 0.3 | 0.5674 |
| **SQSTM1** | 12 | 19 | 7.1 | 24 | 6.3 | 0.3646 | 15 | 29 | 13.2 | 24 | 6.3 | 0.0055 | 8 | 4 | 1.8 | 11 | 2.9 | 0.8417 | 11 | 4 | 6.9 | 24 | 6.3 | 0.4856 |
| **TREM2** | 9 | 18 | 6.7 | 13 | 3.4 | 0.0343 | 7 | 7 | 3.2 | 13 | 3.4 | 0.6474 | 8 | 5 | 2.3 | 7 | 1.8 | 0.4879 | 7 | 7 | 12.1 | 13 | 3.4 | 0.0114 |

**Supplemental Table S10.** Case-burden test results for all risk factor genes across all diseases compared to all controls (n=380). Number of variants (V) together with the number (n) and percentage of each cohort possessing a variant in each gene are shown for each disease cohort. Associations significant at the uncorrected threshold are shaded grey. Key – AD; Alzheimer’s disease, FTD-ALS; Frontotemporal dementia – Amyotrophic Lateral Sclerosis, CJD; Creutzfeldt-Jakob Disease, DLB; Dementia with Lewy Bodies.
