# Supplementary material for: Genetic compendium of 1511 human brains available through the UK Medical Research Council Brain Banks Network Resource
Source: HighWire-hosted journal article supplement (doi:10.1101/gr.210609.116), 2016-12-21
Supplement: Supplemental_Table_S11.docx [file Supplemental_Table_S11.docx]

| **Chromosome** | **Position** | **Reference allele** | **Variant allele** | **Protein alteration** | **Cases (n)** | **Controls (n)** | **SIFT** | **PolyPhen-2** | **1000G MAF (%)** | **NHLBI ESP 6500 (%)** | **P-value** |
| --- | --- | --- | --- | --- | --- | --- | --- | --- | --- | --- | --- |
| 17 | 42426585 | C | T | p.T18M | 1 | 1 | Damaging | Possibly Damaging | 0.02 | 0.02 | 0.25 |
| 17 | 42426803 | C | A | p.P50T | 1 | 0 | Damaging | Benign |  | 0 | 0.13 |
| 17 | 42428756 | G | C | p.E287D | 1 | 0 | Tolerated | Possibly  Damaging |  | 0.01 | 0.13 |
| 17 | 42428788 | G | A | p.R298H | 0 | 1 | Tolerated | Damaging |  | 0 | 1.00 |
| 17 | 42428954 | G | A | p.A324T | 2 | 1 | Tolerated | Benign | 0.1 | 0.14 | 0.05 |
| 17 | 42429500 | C | T | p.R433W | 0 | 1 | Damaging | Benign | 0.16 | 0.28 | 1.00 |
| 17 | 42429839 | G | C | p.G515A | 1 | 1 | Tolerated | Benign | 0.54 | 0.01 | 0.25 |
| 17 | 42430146 | G | T | p.A588S | 1 | 7 | Damaging | Benign |  | 0 | 1.00 |

**Supplemental Table S11**. All *GRN* variants (MAF < 3%) seen in DLB cases and controls. Variant position (GRCh37) together with the amino-acid change are provided and the number of cases and controls from each cohort (DLB n=58 and Controls n=380) are shown. *In-silico* predictions using SIFT and PolyPhen2 are shown together with Minor Allele frequency (MAF) in the 1000 Genomes database (1000G) and NHLBI ESP 6500 database. P-values are calculated by Chi-squared test.
