# Supplementary material for: Genetic compendium of 1511 human brains available through the UK Medical Research Council Brain Banks Network Resource
Source: HighWire-hosted journal article supplement (doi:10.1101/gr.210609.116), 2016-12-21
Supplement: Supplemental_Variant_data.xlsx [file Supplemental_Variant_data.xlsx]

## Sheet: Information
General Information
The following tabs show the variant data corresponding to all 313 non-synonymous rare variants (MAF < 0.5%) identified in 42 genes associated with monogenic forms of neurodegenerative disorders (Supplemental Table 2)
In addition, rare monogenic cases with confirmed monogenic forms of disease are also shown in the 'Pathogenic_heterozygous' and 'Pathogenic_recessive' tabs
A description of clinical data for each phenotype associated with each variant is shown, and variants are divided by ACMG pathogenicity criteria.
All variant positions are with respect to GRCh37 build. Minor Allele Frequencies (MAF) from the 1000Genomes (1000G), NHLBI 6500 ESP and ExAC databases are given together with in-silico prediction by SIFT (Kumar et al. 2009) and PolyPhen2 (Adzhubei et al. 2010).
Key; MND – Motor Neuron Disease, CJD – Creutzfelt-Jakob Disease, AD – Alzheimer’s disease, CADASIL – Cerebral Autosomal-Dominant Arteriopathy with Subcortical Infarcts and Leukoencephalopathy.
References
	Kumar P, Henikoff S, Ng PC (2009) Predicting the effects of coding non-synonymous variants on protein function using the SIFT algorithm. Nat Protoc 4:1073-1081
	Adzhubei IA, Schmidt S, Peshkin L, Ramensky VE, Gerasimova A, Bork P, Kondrashov AS, Sunyaev SR (2010) A method and server for predicting damaging missense mutations. Nat Methods 7:248-249
NOTE - There is an additional word document that accompanies this database containing all the references enclosed within (Variant_data_supplement.word)

## Sheet: Pathogenic_heterozygous
MaArthur Criteria														ACMG Criteria
														Pathogenic																Benign														ACMG classification
Variant		Genetic					Informatic		Experimental			Study cases		Very Strong	Strong				Moderate						Supporting					Strong							Supporting							Pre-assessment					Post-assessment
Gene	Protein alteration	Association (cases vs controls)	Segregation	1000G MAF (%)	6500 ESP MAF (%)	ExAC MAF (%)	Conservation	Location (appropriate)	Gene disruption	Phenotype recapitulation	Rescue	Number of cases	Number of controls	PSV1	PS1	PS2	PS3	PS4	PM1	PM2	PM3	PM4	PM5	PM6	PP1	PP2	PP3	PP4	PP5	BS1	BS2	BS3	BS4	BS5	BS6	BS7	BP1	BP2	BP3	BP4	BP5	BP6	BP7	P	LP	B	LB	US	P
SOD1	p.I114T	Described within in several families with MND (Rosen et al. 1993)	Segregation full (Rosen et al. 1993)	NS	NS	NS	3.334e-05	Located in exon 4. Pathogenic variants can lie throughout the polypeptide (Cleveland and Rothstein 2001).	Reduced axonal outgrowth and reduced cell survival (Karumbayaram et al. 2009), and moderate aggregate formation (Prudencio et al. 2009)	Moderate degrees of protein aggregation seen in cell culture (Prudencio et al. 2009)	Unknown	3	0		1		1		1	1					1	1	1																	1					1
SOD1	p.D102N	Seen in several families with MND (Prudencio et al. 2009)	Segregates with disease (Prudencio et al. 2009)	NS	NS	NS	2.818e-06	Located in exon 4. Pathogenic variants can lie throughout the polypeptide (Cleveland and Rothstein 2001).	Able to rapidly induce protein aggregates in comparison to WT or other mutant SOD1 variants (Ayers et al. 2014)	Induces intracellular aggregates in vitro (Ayers et al. 2014)	Unknown	2	0		1		1		1	1					1	1	1																	1					1
SOD1	p.E101G	Seen in several families with MND (Rosen et al. 1993)	Segregates with disease (Rosen et al. 1993)	NS	NS	NS		Located in exon 4. Pathogenic variants can lie throughout the polypeptide (Cleveland and Rothstein 2001).	Induces protein aggregation in vitro (Prudencio et al. 2009), and is also recognized by a monoclonal antibody to pathogenic variants (Fujisawa et al. 2012).	Induces intracellular aggregates in vitro (Ayers et al. 2014)	Unknown	1	0		1		1		1	1					1	1	1																	1					1
PSEN1	p.R265H; p.R269H	Described in several families with AD (Gomez-Isla et al. 1997; Larner et al. 2007)	Segregates with disease (Gomez-Isla et al. 1997)	NS	NS	0	2.512e-05	Situated within TM-V domain in which pathogenic mutations are known to reside	Alters interaction with actin-binding proteins (Zhang et al. 1998) and enhances deposition of A-bet x-42/43 (Gomez-Isla et al. 1999)	Unknown	Unknown	1	0		1		1		1	1																								1					1
PSEN1	p.A246E; p.A242E	Described in several cases and families with AD (Sherrington et al. 1995)	Segregates with disease	NS	NS	NS	3.451e-05	Situated within TM-IV	Abolishes ER calcium leak (Nelson et al. 2007), increases BACE1 activity (Giliberto et al. 2009) and elevates levels if the 42 residue beta-amyloid protein (Jankowsky et al. 2004)	Transgenic mouse with the develops AD pathology (Borchelt et al. 1997)	Unknown	1	0		1		1		1	1					1	1	1																	1					1
PSEN1	p.F237L; p.F233L	Seen in one sporadic case and one family previously (Sodeyama et al. 2001; Janssen et al. 2003)	Segregated across 2 generations and 3 patients (Janssen et al. 2003)	NS	NS	NS	7.762e-06	Situated in TM-V domain in which several pathogenic mutations previously described	Unknown	Unknown	Unknown	1	0		1				1	1	1																							1					1
PSEN1	p.G202D; p.G206D	Seen in previous families segregating with disease (Wu et al. 2011)	Segregates with disease (Wu et al. 2011)	NS	NS	NS	7.295e-07	Situated in TM-IV domain in which several pathogenic mutations previously described	Increases AB42 production (Chen et al. 2014b)	Unknown	Unknown	1	0		1				1	1						1	1																	1					1
PSEN1	p.S170F; p.S166F	Seen in several previous families with AD (Piccini et al. 2007) and DLB (Snider et al. 2005)	Segregates with disease (Snider et al. 2005)	NS	NS	NS	0.000597	Within the TM-III domain	Increase AB42/40 ratio (Giliberto et al. 2009)	Increase AB42/40 ratio (Giliberto et al. 2009)	Unknown	1	0		1		1		1	1					1	1	1																	1					1
PSEN1	p.L153V; p.L149V	Seen previously in several cases and no controls (Raux et al. 2000; Cornejo-Olivas et al. 2014)	Segregates with disease (Raux et al. 2000)	NS	NS	NS	0.006138	Situated in TM-II domain in which several pathogenic mutations previously described	Unknown	Unknown	Unknown	1	0		1				1	1					1	1	1																	1					1
PSEN1	p.M135I; p.M139I	Seen previously in one family (Kim et al. 2010)	No data for segregation	NS	NS	NS	0.0001109	Situated in TM-II domain in which several pathogenic mutations previously described	Increases AB42 levels in vitro (Murayama et al. 1999)	Unknown	Unknown	1	0		1		1			1						1																		1					1
PSEN1	p.P436S; p.P432S	Seen in previously in cases (Palmer et al. 1999)	Segregated with disease (Palmer et al. 1999)	NS	NS	NS	4.188e-07	Situated in TM-IX domain	Significant reduction in gamma secretase activity (Heilig et al. 2010)	Unknown	Unknown	1	0		1		1		1	1																								1					1
PRNP	p.E211Q	Previously seen in at least one family of gCJD (Peoc'h et al. 2000)	Fully penetrant and segregates (Peoc'h et al. 2000)	NS	NS	NS	0.0005309	Located within the third alpha-helix of PrP	Significantly alters primary structure and stability and aggregation propensity (Peoc'h et al. 2012)	Yes	Unknown	1	0		1		1		1	1					1	1	1																	1					1
PRNP	p.E200K	Fully penetrant cause of gCJD (Spudich et al. 1995)	Fully penetrant (Spudich et al. 1995)	NS	NS	NS	0.0007031	Sits within known region of pathogenicity and results in a deamination of a CpG dinucleotide	Significantly alters protein confirmation consistently (Peoc'h et al. 2012)	Fatal phenotype and recapitulation in mice (Friedman-Levi et al. 2011)	Unknown	7	0		1			1	1	1						1	1																	1					1
NOTCH3	p.R153C	Described previously in several families (Mandellos et al. 2005)	Segregates with disease (Mandellos et al. 2005)	NS	NS	NS	0.0004887	Present in EGF domain and affects cysteine residue	Alters protein folding of NOTCH3 (Dichgans et al. 2000)	Unknown	Unknown	1	0	1	1				1	1					1	1																		1					1
HEXA	p.R499C	Previously described in several cases (Mules et al. 1992) (Tanaka et al. 2003)	Segregated in previous studies (Mules et al. 1992)	NS	NS	NS	0.00897	Located in the α-subunit of the resulting in decreased solubility and aggregation (Paw et al. 1990)	Unknown	Unknown	Unknown	1	0		1		1		1						1	1		1																1					1
GRN	p.C139R	Seen in 2 cases and no controls (n=200) (Bernardi et al. 2009) and 3 cases and no controls (n=459) (Brouwers et al. 2008)	No data for segregation	NS	NS	NS	0.0001828	Has a destabilizing effect on the granulin-fold by disrupting one of the cysteine disulfide bridges	Reduced plasma granulin levels suggesting a partial loss of function (Finch et al. 2009)	Unknown	Unknown	1	0				1	1		1						1	1																	1					1
GRN	p.Q130fs*125	Cited in several papers (Baker et al. 2006) (Le Ber et al. 2007) (Yu et al. 2010)	Segregates with disease in several reports	NS	NS	NS		Located in exon 5 and GrafF domain	Reduces plasma progranulin levels (Carecchio et al. 2009)	Unknown	Unknown	1	0		1		1		1	1																								1					1
GRN	p.C31fs*35	Seen in at least 4 families (Beck et al. 2008)	Segregates with families (Beck et al. 2008)	NS	NS	NS	0.00134	Located in exon 2 and paraGran domain	Reduces gross neural connectivity and results in similar synaptic vesicle phenotype tp that seen in vivo (Tapia et al. 2011)	Unknown	Unknown	1	0		1				1	1						1	1																	1					1
FUS	p.R517C; p.R521C; p.R520C	Variant at same position segregates with disease in several families (Yan et al. 2010)	Variant at same position segregates with disease in several families (Yan et al. 2010) (Vance et al. 2009)	NS	NS	NS		Located at the C-terminal region of the protein	Alters ratio of soluble to insoluble FUS (Vance et al. 2009)	Induces axonal defects in vitro (Groen et al. 2013)	Unknown	1	0		1		1	1	1	1					1																			1					1
DNAJC5	p.L115R	Seen previously in numerous cases (Benitez et al. 2011; Cadieux-Dion et al. 2013)	Has previously been shown to segregate in families	NS	NS	NS	1.38e-05	Occurs in the cysteine-string domain; post-translationally modified by extensive palmitoylation (Greaves et al. 2012)	Occurs in the cysteine-string domain; post-translationally modified by extensive palmitoylation (Greaves et al. 2012)	Forms mutant aggregates in vitro (Greaves et al. 2012)	Unknown	1	0		1		1		1						1	1		1																1					1
												28
[truncated: 5 more columns]

## Sheet: Pathogenic_recessive
MaArthur Criteria														ACMG Criteria
														Pathogenic																Benign														ACMG classification
Variant		Genetic					Informatic		Experimental			Study cases		Very strong	Strong				Moderate						Supporting					Strong							Supporting							Pre-assessment					Post-assessment
Gene	Protein alteration	Association (cases vs controls)	Segregation	1000G MAF (%)	6500 ESP MAF (%)	ExAC MAF (%)	Conservation	Location (appropriate)	Gene disruption	Phenotype recapitulation	Rescue	Number of cases	Number of controls	PSV1	PS1	PS2	PS3	PS4	PM1	PM2	PM3	PM4	PM5	PM6	PP1	PP2	PP3	PP4	PP5	BS1	BS2	BS3	BS4	BS5	BS6	BS7	BP1	BP2	BP3	BP4	BP5	BP6	BP7	P	LP	B	LB	US	P
PARK2	p.P437L; p.P409L; p.P288L	Previously described in an early onset case of PD (Mellick et al. 2009)	N/A	0.04	0.24	0.15	0.000113	Situated in the RING 2 domain of the protein. RING2 forms a hydrophobic interface with the UPD, burying the catalytic Cys431, which is part of a conserved catalytic triad (Sriram et al. 2005)	Almost completely abolishes the binding ability of Parkin (Sriram et al. 2005)	Unknown	Unknown	1	0		1		1										1																	1					1
OPTN	p.R217*	Novel	N/A	NS	NS	NS	N/A	Premature stop codon. This is prior to the coiled coil 2 domain necessary for the binding to ubiquitin and ubiquitin receptor-interacting protein (Maruyama et al. 2010)	The previously described homozygous nonsense mutation (p.Q398X) showed no ability to inhibit NF-kB (Maruyama et al. 2010)	Unknown	Unknown	1	0	1						1		1																						1					1
SOD1	p.D91A	Seen in several pedigrees in the homozygous state (Andersen et al. 1995)	Fully penetrant	0.04	0.05	0.11		The mutation destabilises the apoSOD1 monomer (Bystrom et al. 2010). Pathogenic mutations in SOD1 exist throughout the gene.	Increases susceptibility to oxidative stress and impairment of respiratory complexes (Ferri et al. 2006)	Mild similar phenotype in mice (Jonsson et al. 2006a)	Unknown	1	0			1		1		1					1	1	1																	1					1
VPS13A	p.L1841*; p.L1802*	Novel	Unknown	NS	NS	NS	1.53e-05	No specific functional domain known in association with disease	Unknown	Unknown	Unknown	1	0	1					1								1	1																1					1
VPS13A	p.W2347fs*36; p.W2308fs*36	Novel	Unknown	NS	NS	NS	2.17e-06	No specific functional domain known in association with disease	Unknown	Unknown	Unknown			1					1			1					1	1																1					1
PARK2	p.G430D; p.G281D; p.G402D	Pathogenic in homozygous state (Mellick et al. 2009)	N/A	0	0.02	0.01	0.0001127	Located in exon 12 of the PARK2 gene	NF-kB activation are reduced by PD-linked parkin pathogenic mutations (Henn et al. 2007), and alters mitochondrial translocation and clearance (Geisler et al. 2010)	Unknown	Unknown	1	0		1		1		1																									1					1
PARK2	p.R275W; p.R126W; p.R247W	Pathogenic in compound heterozygous cases (Klein et al. 2005)	N/A	0.04	0.2	0.21	0.006412	Located in exon 7	Alters mitochondrial translocation and clearance (Geisler et al. 2010) and alters parkin localization (Cookson et al. 2003)	Causes cytoplasmic inclusions (Cookson et al. 2003)	Unknown				1		1		1																									1					1
[truncated: 5 more columns]

## Sheet: Likely_pathogenic_heterozygous
MacArthur Criteria														ACMG Criteria
														Pathogenic																Benign														ACMG classification
Variant		Genetic					Informatic		Experimental			Number of cases		Very Strong	Strong				Moderate						Supporting					Strong							Supporting							Pre-assessment					Post-assessment
Gene	Protein alteration	Association (cases vs controls)	Segregation	1000G MAF (%)	6500 ESP MAF (%)	ExAC MAF (%)	Conservation	Location (appropriate)	Gene disruption	Phenotype recapitulation	Rescue	Number of cases	Number of controls	PSV1	PS1	PS2	PS3	PS4	PM1	PM2	PM3	PM4	PM5	PM6	PP1	PP2	PP3	PP4	PP5	BS1	BS2	BS3	BS4	BS5	BS6	BS7	BP1	BP2	BP3	BP4	BP5	BP6	BP7	P	LP	B	LB	US	P
SQSTM1	p.A427T; p.A343T	Not previously reported	Unknown	NS	NS	0	0.0001062	Situated within the UBA domain in which pathogenic mutations have previously been identified.	Mutations at codon 425 result in loss of polyubiquitin-binding and increased activation of NF-KB (Hocking et al. 2004)	Unknown	Unknown	1	0							1	1						1	1																1					1
PSEN2	p.G70W	Novel	Unknown	NS	NS	NS	0.002951	Located in N-terminal domain	Unknown	Unknown	Unknown	1	0								1						1	1																1					1
PSEN2	p.L204I	Novel	Unknown	NS	NS	NS	0.005284	Located in the 4th TM domain	Unknown	Unknown	Unknown	1	0							1	1						1	1																1					1
PSEN2	p.V101M	Novel	Unknown	NS	0.01	NS	8.222e-07	Located in TM-I domain in which several pathogenic mutations described	Unknown	Unknown	Unknown	1	0						1	1							1	1	1															1					1
PSEN2	p.D439A; p.D438A	Described in several cases of disease, but also seen in low-frequency in controls (Lleo et al. 2002; Sassi et al. 2014)	Possible incomplete penetrance (Sassi et al. 2014)	NS	0.02	0	6.053e-06	Outside TM domain, but within the C-terminal region which is involved in X-terminal trafficking	Unknown	Doesn't alter Ab40/42 ratio (Walker et al. 2005)	Unknown	2	0			1										1	1		1				1											1					1
PSEN1	p.I110N	Novel	Unknown	NS	NS	NS	2.5e-05	Located in exon 4 - HL-I domain	Unknown	Unknown	Unknown	1	0						1	1						1	1																	1					1
HNRNPA1	p.G316R; p.G264R	Novel	Unknown	NS	NS	NS	8.091e-06	Situated 42 bases away from a previously described variant (Kim et al. 2013)	Unknown	Unknown	Unknown	1	0							1	1						1	1																1					1
GRN	P.V452Wfs*39	Described previously in a single case (Chen-Plotkin et al. 2011)	Unknown	NS	NS	NS	N/A	Situated in exon 11, one amino acid away from another previously described possible pathogenic mutation (Brouwers et al. 2008)	Unknown	Unknown	Unknown	1	0			1				1	1						1																	1					1
CHMP2B	p.R69Q; p.R28Q	Described previously in a case of PMA (van Blitterswijk et al. 2012b)	Unknown	NS	0.02	0	3.802e-06	Located in well conserved N-terminal region	Unknown	Unknown	Unknown	1	0		1					1							1	1	1	1														1					1
APP	p.M698I; p.M612I;	Novel	Unknown	NS	NS	NS	1.854e-06	Sits within TM-I region in which pathogenic variants have previously been described.	Unknown	Unknown	Unknown	1	0							1	1						1	1																1					1
[truncated: 5 more columns]

## Sheet: Pathogenicity_questioned
MacArthur Criteria														ACMG Criteria
														Pathogenic																Benign														ACMG classification
Variant		Genetic					Informatic		Experimental			Number of cases		Very Strong	Strong				Moderate						Supporting					Strong							Supporting							Pre-assessment					Post-assessment
Gene	Protein alteration	Association (cases vs controls)	Segregation	1000G MAF (%)	6500 ESP MAF (%)	ExAC MAF (%)	Conservation	Location (appropriate)	Gene disruption	Phenotype recapitulation	Rescue	Number of cases	Number of controls	PSV1	PS1	PS2	PS3	PS4	PM1	PM2	PM3	PM4	PM5	PM6	PP1	PP2	PP3	PP4	PP5	BS1	BS2	BS3	BS4	BS5	BS6	BS7	BP1	BP2	BP3	BP4	BP5	BP6	BP7	P	LP	B	LB	US	P
SNCA	p.H50Q	Previously described in several cases of PD (Appel-Cresswell et al. 2013) (Proukakis et al. 2013)	Unknown	NS	0	0		Disrupts the protein's amphipathic helix; and located between other pathogenic point mutations (Appel-Cresswell et al. 2013)	Unknown	Unknown	Unknown	1	1		1		1		1																									1
NOTCH3	p.C835fs*25	Not previously seen	No data for segregation	NS	NS	NS	2.158e-06	In EGF domain and affects cysteine residue	Unknown	Unknown	Unknown	1		1					1	1																								1
CHMP2B	p.I29V	Seen previously in ALS and FTD, but also in a control (Cox et al. 2010)	Unknown	NS	0.02	0.01		Positioned within two conserved regions, the snf-7 and coiled coil domain	Significantly increases vacuolation (Cox et al)	Unknown	Unknown	0	1		1		1		1																									1
SOD1	p.D91A	Incomplete penetrance well described (Khoris et al. 2000) (Al-Chalabi et al. 1998)	Incomplete dominant inheritance (Al-Chalabi et al. 1998)	0.04	0.08	0.11		The mutation destabilise the apoSOD1 monomer (Bystrom et al. 2010). Pathogenic mutations in SOD1 exist throughout the gene.	Neurons harboring the variant are more susceptibility to oxidative stress (An et al. 2008)	Mild phenotype in mice (Jonsson et al. 2006b)	Unknown	2	2				1		1							1	1	1																1
SNCA	p.P117T	Not previously reported	Unknown	NS	0.01	0	0.004436	Located in the C-terminal acidic tail.	Unknown	Unknown	Unknown	1	0					1		1							1																		1
PSEN2	p.P123T	Novel	Unknown	NS	NS	NS	1.321e-06	Located in HL-I domain, but one amino acid away from a known pathogenic variant (Finckh et al. 2000)	Variant p.Thr122Pro alters Ab40/42 ratio (Walker et al. 2005)	Unknown	Unknown	1	0								1	1					1	1	1																1
PSEN1	p.D40del; p.D36del	Seen in a single case previously (Nygaard et al. 2014)	Unknown	NS	NS	NS		Located in N-terminal region	Unknown	Unknown	Unknown	1	0								1						1	1	1																1
FUS	p.H513N; p.H516N; p.H517N	Novel	Unknown	NS	NS	NS	6.792e-05	Located in the C-terminal region. Several other pathogenic mutations located within the region (Vance et al. 2009)	A variant in the same region (R521H) significantly alters function through a toxic gain of function (Kabashi et al. 2011)	Variants at codon 521 cause phenotype (Kabashi et al. 2011)	The variants at codon 521 do not rescue the phenotype (Kabashi et al. 2011)	0	1								1			1			1	1																	1
DAO	p.R199W	Segregated with ALS in a single family(Mitchell et al. 2010)	Segregated within family (Mitchell et al. 2010)	NS	0.06	0.03	0.002432	The mutation lies close to the FAD binding site and a region controlling enzymatic activity (Mitchell et al. 2010)	Co-cultured neurons with astrocytes expressing R199W induced cell death and neuronal cell lines decreased cell viability (Mitchell et al. 2010)	Ubiquitinated cell aggregates seen (Mitchell et al. 2010)	Unknown	3	0					1								1	1	1																	1
ANG; RNASE4	p.K41I	Seen in 5 of 1037 ALS cases (van Blitterswijk et al. 2012a)	Segregated in one case report (van Es et al. 2009)	0.04	0.26	0.14		Located in a critical and well-established functional domain (RNase_A_canonical)	Induces a complete loss of ANG function (Wu et al. 2007)	Alters neuron morphology (Thiyagarajan et al. 2012)	Unknown	2	1			1		1																											1
ANG; RNASE4	p.P136L	Seen in a single case previously (Wu et al. 2007)	Unknown	NS	0.01	0		Located in a critical and well-established functional domain (RNase_A_canonical)	Almost entirely abolishes ANG function and reduces nuclear translocation (Wu et al. 2007) (Padhi et al. 2012).	Unknown	Unknown	1	0					1			1							1																	1
[truncated: 5 more columns]

## Sheet: Uncertain_Significance
MacArthur Criteria														ACMG Criteria
														Pathogenic																Benign														ACMG classification
Variant		Genetic					Informatic		Experimental			Number of cases		Very Strong	Strong				Moderate						Supporting					Strong							Supporting							Pre-assessment					Post-assessment
Gene	Protein alteration	Association (cases vs controls)	Segregation	1000G MAF (%)	6500 ESP MAF (%)	ExAC MAF (%)	Conservation	Location (appropriate)	Gene disruption	Phenotype recapitulation	Rescue	Number of cases	Number of controls	PSV1	PS1	PS2	PS3	PS4	PM1	PM2	PM3	PM4	PM5	PM6	PP1	PP2	PP3	PP4	PP5	BS1	BS2	BS3	BS4	BS5	BS6	BS7	BP1	BP2	BP3	BP4	BP5	BP6	BP7	P	LP	B	LB	US	P
PSEN2	p.L192I	Novel	U	NS	NS	NS		Located in the topological domain prior to the third transmembrane region	Unknown	Unknown	Unknown	2	0							1						1	1																					1
PSEN2	p.R435Q	Not previously described	U	NS	0.01	0	0.002972	Outside TM domain, but within the C-terminal region which is involved in X-terminal trafficking	Unknown	Unknown	Unknown	1	0													1																						1
DCTN1	p.E895D	Novel	U	NS	NS	NS		Outside major functional domains	Unknown	Unknown	Unknown	1	0							1																												1
DCTN1	p.T502M	Novel	U	NS	NS	NS	4.375e-05	Within the first coiled coil domain	Unknown	Unknown	Unknown	1	0							1																												1
DCTN1	p.T138I	Novel	U	NS	NS	NS	0.0006577	Outside major functional domains	Unknown	Unknown	Unknown	1	0																																			1
HTRA2	p.L43V	Novel	U	NS	NS	NS		Between N-terminal mitochondrial targeting domain and transmembrane domain	Unknown	Unknown	Unknown	1	0								1																											1
HTRA2	p.S15W	Not previously associated with disease	U	NS	NS	0.02	0.00042	Within N-terminal mitochondrial targeting sequence	Unknown	Unknown	Unknown	1	0								1							1																				1
GIGYF2	p.Q922P	Novel	U	NS	NS	NS	7.178e-05	Mis-sense variant. No convincing specific region for pathogenicity in literature	Unknown	Unknown	Unknown	1	0							1																												1
CHMP2B	p.S153L	Seen in a single case of FTD (Ghanim et al. 2010) and also seen in 1 of 750 controls (van Blitterswijk et al. 2012b)	U	NS	0.02	0	5.272e-06	Located in the c-terminal domain, and alters protein stability (van Blitterswijk et al. 2012b)	Located in the c-terminal domain, and alters protein stability (van Blitterswijk et al. 2012b)	Unknown	Unknown	1	0						1							1																						1
EIF4G1	p.R945Q	Novel	U	NS	NS	NS	0.001589	Mis-sense variant. Functional effects unknown. May alter eIF3/EIF4A binding	Unknown	Unknown	Unknown	1	0							1																												1
EIF4G1	p.P1075L	Novel	U	NS	NS	NS	3.873e-06	Mis-sense variant in well conserved region	Unknown	Unknown	Unknown	1	0							1																												1
EIF4G1	p.M1356T	Not previously associated with disease	U	NS	0.08	0.04	0.0005649	Mis-sense variant in well conserved region	Unknown	Unknown	Unknown	1	1																		1																	1
MATR3	p.D187E	Not previously associated with disease	U	NS	0.01	0	0.007112	Mis-sense variant. No convincing specific region for pathogenicity in literature	Unknown	Unknown	Unknown	1	0																																			1
MATR3	p.A745V	Not previously associated with disease	U	NS	NS	0		Mis-sense variant. No convincing specific region for pathogenicity in literature	Unknown	Unknown	Unknown	1	0							1																												1
SQSTM1	p.P29S	Not previously associated with disease	U	NS	NS	0.02		Mis-sense variant in PB1 domain	Unknown	Unknown	Unknown	1	0							1																				1								1
SQSTM1	p.R55C	Not previously associated with disease	U	NS	NS	0	0.006209	Situated in the ZZ_ADA2 domain	Unknown	Unknown	Unknown	1	0							1						1																						1
SQSTM1	p.R161W	Not previously associated with disease	U	NS	NS	0		Located in a critical and well-established functional domain (ZZ_ADA2)	Unknown	Unknown	Unknown	1	0							1						1																						1
SQSTM1	p.R209C	Novel	U	NS	NS	NS		Mis-sense variant in no specific domain	Unknown	Unknown	Unknown	1	0													1																						1
SQSTM1	p.P228L	Seen in 1/546 cases and 0/724 controls (Fecto et al. 2011)	U	NS	0.05	0.01	0.008017	Sits in TRAF6 binding domain	Unknown	Unknown	Unknown	1	0							1						1																						1
C9orf72	p.D419N	Novel	U	NS	NS	NS	4.325e-06	Unknown functional domain	Unknown	Unknown	Unknown	1	0							1																												1
C9orf72	p.I413M	Not previously associated with disease	U	NS	NS	0		Unknown functional domain	Unknown	Unknown	Unknown	1	0							1																												1
C9orf72	p.D347Y	Novel	U	NS	NS	NS	1.552e-06	Unknown functional domain	Unknown	Unknown	Unknown	1	0							1																												1
C9orf72	p.N207del	Not previously associated with disease	U	NS	NS	0		Amino acid 207 is known to have a polymorphism p.N207S	Unknown	Unknown	Unknown	1	0							1																												1
C9orf72	p.I17M	Novel	U	NS	NS	NS		Unknown	Unknown	Unknown	Unknown	1	0							1							1																					1
VCP	p.R113S	Novel	U	NS	NS	NS	6.839e-05	Contained within the AAA2 region and exon 4 in which pathogenic mutations previously described	Unknown	Unknown	Unknown	1	0						1	1						1	1																					1
DAO	p.R2H	Not previously associated with disease	U	0	0.02	0.01		Situated in nucleotide binding domain. Functional impairment unclear	Unknown	Unknown	Unknown	1	0																																			1
DAO	p.F90V	Not previously associated with disease	U	NS	0.03	0.03		Functional impairment unclear	Unknown	Unknown	Unknown	1	0																	1																		1
DAO	p.P103L	Not previously associated with disease	U	0.06	0	0.04	6.281e-06	Functional impairment unclear	Unknown	Unknown	Unknown	1	1																																			1
DAO	p.R274G	Novel	U	NS	NS	NS		Situated in well conserved region	Unknown	Unknown	Unknown	1	0							1																				1								1
PSEN1	p.R27R	Novel	U	NS	NS	NS		Splice-site altering variant. Predicted by MaxEntScan to result in an in-frame insertion	Unknown	Unknown	Unknown	1	0																																			1
FUS	p.P18S	Seen in 2 of 454 cases and 0 of 450 controls (Belzil et al. 2011), however has a relatively high freq in international databases.	U	NS	0.02	0	0.005662	Located in well conserved N-terminal region	Unknown	Unknown	Unknown	1	0													1														1								1
FUS	p.S135N	Seen in 1 of 168 SALS patients (Rademakers et al. 2010)	U	0.2	0.01	0.03	2.265e-05	Located in the QGSY-Region. Additional variants in these region are not pathogenic (Cruts et al. 2012)	Unknown	Unknown	Unknown	1	0													1														1								1
FUS	Splice-site alteration	Novel	U	NS	NS	NS	0.006966	Splice site altering variant. This is highly likely to result in exon skipping (MaxEntScore decrease 100%)	Unknown	Unknown	Unknown	1	0													1														1								1
VPS35	p.N384S	Not previously associated with disease	U	NS	NS	0	7.962e-06	Mis-sense variant. Regional function unclear	Unknown	Unknown	Unknown	1	0							1																				1								1
PFN1	p.E117G	Seen in 3/1090 patients with ALS and 3/7560 controls (p=0.03) (Wu et al. 2012). This variant was also seen in 0.11% of 13089 controls and 0.25% of 5188 cases (p=0.036) with an odds ratio of 2.44 for ALS (Fratta et al. 2014)	U	NS	NS	NS	0.003724	Located close to actin binding domain	Doesn't reduce bound actin (Wu et al. 2012)	Moderate levels of protein aggregation (Wu et al. 2012)	Partly reduces axonal outgrowth in vitro (Wu et al. 2012)	5	0					1	1							1																						1
GRN	p.V8M	Novel	U	NS	NS	0		Mis-sense variant. Regional function unclear	Unknown	Unknown	Unknown	1	0							1																												1
GRN	Splice site alteration	Seen in one previous case causing a corticobasal syndrome (Masellis et al. 2006), also seen in very low freq in controls	U	NS	0.01	0	0.0002594	Alters splicing	Induces haploinsufficiency (Masellis et al. 2006)	Unknown	Unknown	1	0							1						1																						1
GRN	p.R298H	Seen previously in a single case of FTLD-U (Yu et al. 2010)	U	NS	NS	0.01		Mis-sense variant in the Granulin-4 domain	Unknown	Unknown	Unknown	1	0							1																												1
MAPT	p.A2S	Novel	U	NS	NS	NS		Located after Granulin-7 domain	Unknown	Unknown	Unknown	1	0							1																				1								1
MAPT	p.P184L	Novel	U	NS	NS	NS		Located outside the tubulin binding domain	Unknown	Unknown	Unknown	1	0							1							1																					1
PRNP	p.D167G	Seen in 1 case of CJD before (Bishop et al. 2009)	U	NS	NS	NS		Any disruption in coding domain may affect function	Unknown	Unknown	Unknown	1	0							1						1	1																					1
APP	p.V173F	Novel	U	NS	NS	NS	2.056e-06	Not within TM domain	Unknown	Unknown	Unknown	1	0																																			1
APP	p.V97I	Not previously associated with disease	U	NS	NS	0	2.864e-05	Not within TM domain	Unknown	Unknown	Unknown	1	0																																			1
CHCHD10	p.A13T	Novel	U	NS	NS	NS	0.001633	Sits within the N-terminal domain	Unknown	Unknown	Unknown	1	0							1																				1								1
UBQLN2	p.S222G	Novel	U	NS	NS	NS		Sits within a nonstructured domain	Unknown	Unknown	Unknown	1	0							1																				1								1
												52
[truncated: 5 more columns]

## Sheet: Likely_Benign
MacArthur Criteria														ACMG Criteria
														Pathogenic															Benign															ACMG classification
Variant		Genetic					Informatic		Experimental			Number of cases		Very Strong	Strong			Moderate						Supporting					Strong								Supporting							Pre-assessment					Post-assessment
Gene	Protein alteration	Association (cases vs controls)	Segregation	1000G MAF (%)	6500 ESP MAF (%)	ExAC MAF (%)	Conservation	Location (appropriate)	Gene disruption	Phenotype recapitulation	Rescue	Number of cases	Number of controls	PSV1	PS1	PS2	PS3	PS4	PM1	PM2	PM3	PM4	PM5	PM6	PP1	PP2	PP3	PP4	PP5	BS1	BS2	BS3	BS4	BS5	BS6	BS7	BP1	BP2	BP3	BP4	BP5	BP6	BP7	P	LP	B	LB	US	P
PSEN2	p.S30F	Novel	U	NS	NS	0	0.0003041	Located in N-terminal domain	Unknown	Unknown	Unknown	1	0							1						1	1																					1
PSEN2	p.G37V	Novel	U	NS	NS	NS		Located in N-terminal domain	Unknown	Unknown	Unknown	1	2							1						1	1																				1
PSEN2	p.R62C	Same amino acid change seen in 9% of Africans suggesting it is unlikely to be pathogenic (Guerreiro et al. 2010a), however they also have an earlier age of disease onset suggesting they may be disease modifiers (Cruchaga et al. 2012)	U	NS	0.01	0.02		Located in N-terminal domain	Unknown	Unknown	Unknown	2	0																		1											1					1
PSEN2	p.V64F	Novel	U	NS	NS	NS		Located in N-terminal domain	Unknown	Unknown	Unknown	1	0							1																												1
PSEN2	p.C65F	Novel	U	NS	NS	NS		Located in N-terminal domain	Unknown	Unknown	Unknown	1	0							1						1	1																					1
PSEN2	p.R110H	Not previously associated with disease	U	NS	NS	0	5.508e-05	Located in the topological domain prior to a transmembrane region	Unknown	Unknown	Unknown	1	0							1						1	1																					1
PSEN2	p.S130L	Previously described in cases, but also seen in controls (Sassi et al. 2014)	U	0.1	0.1	0.06	6.714e-05	Located in the topological domain prior to a transmembrane region	Does not alter AB 40/42 levels (Walker et al. 2005)	Unknown	Unknown	5	1							1						1																						1
DCTN1	p.V1065I	Not previously seen	U	0.06	NS	0.02		Outside major functional domains	Unknown	Unknown	Unknown	1	0							1																				1								1
DCTN1	p.V1074M	Not previously associated with disease	U	NS	NS	0		Outside major functional domains	Unknown	Unknown	Unknown	2	0							1																				1								1
DCTN1	p.E1067*	Not previously associated with disease	U	NS	0.01	0		Within the second coiled coil domain	Unknown	Unknown	See previous	1	0														1																					1
DCTN1	p.R1029Q	Seen in relatively high frequency in international reference databases	U	0.04	0.23	0.1	1.679e-06	Within the second coiled coil domain	Mutant protein is not ubiquitinated, but does alter cellular morphology causing thin dynatic filaments (Munch et al. 2004)	Mutant protein causes thin dynatic filaments (Munch et al. 2004)	Unknown	9	2														1																					1
DCTN1	p.E1026G	Not previously associated with disease	U	NS	0.02	0.01	1.702e-05	Within the second coiled coil domain	Unknown	Unknown	Unknown	1	0																																			1
DCTN1	p.K851R	Not previously associated with disease	U	NS	NS	0	1.884e-05	Outside major functional domains	Unknown	Unknown	Unknown	2	0							1																												1
DCTN1	p.A803G	Not previously associated with disease	U	NS	0.01	NS	1.71e-06	Outside major functional domains	Unknown	Unknown	Unknown	1	0																																			1
DCTN1	p.R778W	Detected previously in cases of ALS (Liu et al. 2014) however it has also been seen in affected and unaffected relatives (Munch et al. 2004) with a high incidence in population databases	N	NS	0.08	0.02	0.0003228	Outside major functional domains	Does not alter cellular morphology in vitro (Stockmann et al. 2013)	No (Stockmann et al. 2013)	Unknown	1	1																		1	1															1
DCTN1	p.V697L	Novel	U	NS	NS	NS	1.449e-06	Outside major functional domains	Unknown	Unknown	Unknown	1	0							1																												1
DCTN1	p.S661F	Novel	U	NS	NS	NS	5.598e-05	Outside major functional domains	Unknown	Unknown	Unknown	1	0							1																												1
DCTN1	p.A653V	Novel	U	NS	NS	NS	1.832e-06	Outside major functional domains	Unknown	Unknown	Unknown	1	0							1																												1
DCTN1	p.K617N	Novel	U	NS	NS	NS	0.008128	Outside major functional domains	Unknown	Unknown	Unknown	1	0							1																												1
DCTN1	p.V599I	Not previously associated with disease	U	NS	0	0		Outside major functional domains	Unknown	Unknown	Unknown	1	0																																			1
DCTN1	p.P512S	Novel	U	NS	NS	NS	0.000113	Within the first coiled coil domain	Unknown	Unknown	Unknown	1	0							1																												1
DCTN1	p.R465C	Not previously associated with disease	U	NS	NS	0	6.18e-05	Within the first coiled coil domain	Unknown	Unknown	Unknown	0	1							1							1																					1
DCTN1	p.A354T	Novel	U	NS	NS	NS	6.745e-05	Within the first coiled coil domain	Unknown	Unknown	Unknown	1	0							1							1																					1
DCTN1	p.R218Q	Novel	U	NS	NS	NS	1.13e-06	Within the first coiled coil domain	Unknown	Unknown	Unknown	1	0							1							1																					1
HTRA2	p.R173H	Novel	U	NS	NS	NS		Within serine protease domain	Unknown	Unknown	Unknown	1	0																																			1
HTRA2	p.P120S	Novel	U	NS	NS	NS	0.00887	Within transmembrane domain	Unknown	Unknown	Unknown	1	0															1																				1
HTRA2	p.N106H	Not previously associated with disease	U	NS	NS	0	4e-05	Within transmembrane domain	Unknown	Unknown	Unknown	1	0															1																				1
HTRA2	p.V60L	Not previously associated with disease	U	0.04	0.13	0.13		Between N-terminal mitochondrial targeting domain and transmembrane domain	Unknown	Unknown	Unknown	2	2																		1																1
HTRA2	p.A32S	Not previously associated with disease	U	NS	0.01	0		Within N-terminal mitochondrial targeting sequence	Unknown	Unknown	Unknown	1	0																																			1
HTRA2	p.L72P	Seen previously in 2 cases of PD	U	0.16	0.3	0.27		Between N-terminal mitochondrial targeting domain and transmembrane domain	Unknown	Unknown	Unknown	2	1																		1																1
HTRA2	p.T76N	Novel	U	NS	NS	NS		Between N-terminal mitochondrial targeting domain and transmembrane domain	Unknown	Unknown	Unknown	0	1								1																											1
HTRA2	p.N98S	Novel	U	NS	NS	NS		Between N-terminal mitochondrial targeting domain and transmembrane domain	Unknown	Unknown	Unknown	1	0								1																											1
GIGYF2	p.R168C	Not previously associated with disease	U	NS	NS	0		Mis-sense variant. No convincing specific region for pathogenicity in literature	Unknown	Unknown	Unknown	1	0							1							1																					1
GIGYF2	p.G208A	Not previously associated with disease	U	NS	NS	0	0.001679	Mis-sense variant. No convincing specific region for pathogenicity in literature	Unknown	Unknown	Unknown	1	0							1							1																					1
GIGYF2	p.I228M	Novel	U	NS	NS	NS		Mis-sense variant. No convincing specific region for pathogenicity in literature	Unknown	Unknown	Unknown	1	0							1							1																					1
GIGYF2	p.G239V	Novel	U	NS	NS	NS	1.225e-06	Mis-sense variant. No convincing specific region for pathogenicity in literature	Unknown	Unknown	Unknown	1	0							1							1																					1
GIGYF2	p.D257E	Novel	U	NS	NS	NS		Mis-sense variant. No convincing specific region for pathogenicity in literature	Unknown	Unknown	Unknown	1	0							1																												1
GIGYF2	p.D371E	Not previously associated with disease	U	NS	0.13	0.05		Mis-sense variant. No convincing specific region for pathogenicity in literature	Unknown	Unknown	Unknown	1	1																		1									1							1
GIGYF2	p.S396P	Novel	U	NS	NS	NS		Mis-sense variant. No convincing specific region for pathogenicity in literature	Unknown	Unknown	Unknown	1	0							1																				1								1
GIGYF2	p.Q439H	Not previously associated with disease	U	NS	0.02	0.01	0.0008433	Mis-sense variant. No convincing specific region for pathogenicity in literature	Unknown	Unknown	Unknown	2	0																																			1
GIGYF2	p.N451T	Seen in 3/498 of cases of PD (Lautier et al. 2008), but 0 of 727 in another together with one control (Bras et al. 2009).	U	0.02	0.14	0.04		Mis-sense variant. No convincing specific region for pathogenicity in literature	Does not cause dopaminergic cell loss in Zebra fish (Guella et al. 2011)	Unknown	Unknown	1	0																																		1
GIGYF2	p.T702K	Novel	U	NS	NS	NS	9.863e-06	Mis-sense variant. No convincing specific region for pathogenicity in literature	Unknown	Unknown	Unknown	1	0							1																												1
GIGYF2	p.R816C	Not previously associated with disease	U	NS	NS	0		Mis-sense variant. No convincing specific region for pathogenicity in literature	Unknown	Unknown	Unknown	1	0							1							1																					1
GIGYF2	p.R852Q	Not previously associated with disease	U	NS	0.01	0.04	0.0008147	Mis-sense variant. No convincing specific region for pathogenicity in literature	Unknown	Unknown	Unknown	1	0																											1								1
GIGYF2	p.R912Q	Not previously associated with disease	U	NS	0.01	0	0.0003565	Mis-sense variant. No convincing specific region for pathogenicity in literature	Unknown	Unknown	Unknown	0	1																											1								1
GIGYF2	p.R982Q	Not previously associated with disease	U	0.06	0.14	0.06	0.007834	Mis-sense variant. No convincing specific region for pathogenicity in literature	Unknown	Unknown	Unknown	1	0																		1									1							1
GIGYF2	p.S1056C	Not previously associated with disease	U	NS	0.19	0.08	1.469e-05	Mis-sense variant. No convincing specific region for pathogenicity in literature	Unknown	Unknown	Unknown	4	0																		1									1							1
GIGYF2	p.E1169D	Novel	U	NS	NS	NS		Mis-sense variant. No convincing specific region for pathogenicity in literature	Unknown	Unknown	Unknown	1	0							1																												1
GIGYF2	p.H1171R	Previously seen in a young onset PD case (Ghani et al. 2015), but also seen frequently in controls.	U	0.08	0.22	0.16	2.178e-05	Mis-sense variant. No convincing specific region for pathogenicity in literature	Unknown	Unknown	Unknown	4	0																		1									1							1
GIGYF2	p.K1210M	Novel	U	NS	NS	NS	1.901e-05	Mis-sense variant. No convincing specific region for pathogenicity in literature	Unknown	Unknown	Unknown	1	0							1							1																					1
GIGYF2	p.L1230P	Not previously associated with disease	U	NS	NS	0.02		Mis-sense variant. No convincing specific region for pathogenicity in literature	Does not cause dopaminergic cell loss in Zebra fish (Guella et al. 2011)	Unknown	Unknown	54	6																											1								1
GIGYF2	p.Q1207P	Novel	U	NS	NS	NS		Mis-sense variant. No convincing specific region for pathogenicity in literature	Unknown	Unknown	Unknown	3	2																											1								1
GIGYF2	p.Q1223_Q1226del	Novel	U	NS	NS	NS		Mis-sense variant. No convincing specific region for pathogenicity in literature	Unknown	Unknown	Unknown	28	1																																			1
CHMP2B	p.R19Q	Not previously associated with disease	U	0.02	NS	0.01	0.006152	In N-terminal domain	Unknown	Unknown	Unknown	1	0							1							1																					1
CHMP2B	p.R32Q	Not previously associated with disease	U	NS	0.01	0	0.0001837	Mis-sense variant in well conserved region	Unknown	Unknown	Unknown	1	0														1																					1
CHMP2B	p.A33V	Novel	U	NS	NS	NS	4.56e-06	Mis-sense variant in well conserved region	Unknown	Unknown	Unknown	1	0							1																				1								1
EIF4G1	Splice-site alteration (1)	Novel	U	NS	NS	NS		Results in splice site loss	Unknown	Unknown	Unknown	1	0							1																												1
EIF4G1	p.A63D	Novel	U	NS	NS	NS		Mis-sense variant. Functional effects unknown	Unknown	Unknown	Unknown	1	0							1																												1
EIF4G1	Splice-site alteration (2)	Not previously associated with disease	U	NS	0.01	0		Causes alternate splicing	Unknown	Unknown	Unknown	0	1																																			1
EIF4G1	p.P100L	Not previously associated with disease	U	NS	NS	0		Mis-sense variant. Functional effects unknown	Unknown	Unknown	Unknown	1	0							1																												1
EIF4G1	p.I293T	Novel	U	NS	NS	NS		Mis-sense variant. Functional effects unknown	Unknown	Unknown	Unknown	1	0							1																				1								1
EIF4G1	p.A265S	Not previously associated with disease	U	NS	0.02	0.01		Mis-sense variant. Functional effects unknown	Unknown	Unknown	Unknown	1	0																											1								1
EIF4G1	p.G276_A278del	Novel	U	NS	NS	NS		Mis-sense variant. Functional effects unknown	Unknown	Unknown	Unknown	67	10							1																												1
EIF4G1	p.P399S	Not previously associated with disease	U	0.02	0.06	0.08		Mis-sense variant. Functional effects unknown	Unknown	Unknown	Unknown	4	0																		1									1							1
EIF4G1	p.P539L	Not previously associated with disease	U	0.04	NS	0.01		Mis-sense variant. Functional effects unknown	Unknown	Unknown	Unknown	0	1																											1								1
EIF4G1	p.A510P	Not previously associated with disease	U	0.12	0.19	0.1	0.004416	Mis-sense variant. Functional effects unknown	Unknown	Unknown	Unknown	1	1																		1									1							1
EIF4G1	p.S489L	Novel	U	NS	NS	NS	0.004074	Mis-sense variant. Functional effects unknown	Unknown	Unknown	Unknown	1	0							1																				1								1
EIF4G1	p.G490C	Seen in 2 of 251 cases and 0/231 controls (Lesage et al. 2012), and in 2 patients and 0/4000 controls (Chartier-Harlin et al. 2011)	U	NS	NS	0.01	0.001901	Mis-sense variant. Functional effects unknown	Unknown	Unknown	Unknown	2	0							1						1	1													1								1
EIF4G1	p.P703T	Novel	U	NS	NS	NS	0.0004786	Some transcripts alter EIF4E binding site	Unknown	Unknown	Unknown	1	0							1																				1								1
EIF4G1	p.G534A	Seen in 1 of 975 cases and 0 of 1014 controls (Schulte et al. 2012)	U	NS	0.01	0	5.572e-06	Mis-sense variant. Functional effects unknown. May alter eIF3/EIF4A binding	Unknown	Unknown	Unknown	2	0													1	1																					1
EIF4G1	p.A553P	Not previously associated with disease	U	NS	0.15	0.07		Mis-sense variant. Functional effects unknown. May alter eIF3/EIF4A binding	Unknown	Unknown	Unknown	1	1																		1									1							1
EIF4G1	p.I642V	Not previously associated with disease	U	0.02	0.05	0.04	6.295e-06	Mis-sense variant. Functional effects unknown. May alter eIF3/EIF4A binding	Unknown	Unknown	Unknown	2	1																		1									1							1
EIF4G1	p.T634S	Not previously associated with disease	U	NS	0.02	0	0.0002178	Mis-sense variant. Functional effects unknown. May alter eIF3/EIF4A binding	Unknown	Unknown	Unknown	1	0																											1								1
EIF4G1	p.E936*	Novel	U	NS	NS	NS	6.823e-07	Stop-codon insertion	Unknown	Unknown	Unknown	1	0							1		1				1	1																					1
EIF4G1	p.R1074C	Not previously associated with disease	U	NS	0	0	3.873e-06	Mis-sense variant. Functional effects unknown. May alter eIF3/EIF4A binding	Unknown	Unknown	Unknown	1	0													1	1																					1
EIF4G1	p.R1099C	Novel	U	NS	NS	0.01	0.0004064	Mis-sense variant in well conserved region	Unknown	Unknown	Unknown	2	0							1						1	1																					1
EIF4G1	p.L1312V	Novel	U	NS	NS	0		Mis-sense variant in well conserved region	Unknown	Unknown	Unknown	1	0							1																												1
EIF4G1	p.M1336V	Not previously associated with disease	U	0.1	0.02	0.02	1.702e-05	Mis-sense variant in well conserved region	Unknown	Unknown	Unknown	2	0													1	1																					1
EIF4G1	p.I1493V	Novel	U	NS	NS	NS		Mis-sense variant in well conserved region	Unknown	Unknown	Unknown	1	0							1																				1								1
EIF4G1	Splice-site alteration (3)	Novel	U	0	0	0	0.002133	Causes alternate splicing	Unknown	Unknown	Unknown	1	0							1																												1
EIF4G1	p.A1549S	Novel	U	NS	NS	NS		Mis-sense variant in well conserved region	Unknown	Unknown	Unknown	1	0							1						1	1																					1
COQ2	p.N417S	Novel	U	NS	NS	0.01		Mis-sense variant in well conserved region	Unknown	Unknown	Unknown	0	1							1																												1
COQ2	p.Y353C	Novel	U	NS	NS	0	0.0005848	Mis-sense variant in well conserved region	Unknown	Unknown	Unknown	0	1							1																												1
COQ2	p.A201T	Not previously associated with disease	U	NS	0	0	0.0001995	Situated in the (PT_UbiA_1) domain.	Unknown	Unknown	Unknown	1	0													1	1																					1
COQ2	p.R197H	Only previously seen in childhood onset q10 deficiency (Lopez et al. 2010) and CoQ2 nephropathy (Diomedi-Camassei et al. 2007)	N	NS	NS	0	1.175e-06	Located in a critical and well-established functional domain (PT_UbiA_1)	Unknown	Unknown	Unknown	1	0													1	1																					1
COQ2	p.S107T	Not previously associated with disease	U	0.02	NS	0.12	7.907e-05	Mis-sense variant. No convincing specific region for pathogenicity in literature for heterozygous cases	Unknown	Unknown	Unknown	2	1							1																												1
COQ2	p.Q105H	Not previously associated with disease	U	NS	NS	0.05		Mis-sense variant. No convincing specific region for pathogenicity in literature for heterozygous cases	Unknown	Unknown	Unknown	0	1							1																												1
COQ2	p.P96S	Not previously associated with disease	U	NS	NS	0		Mis-sense variant. No convincing specific region for pathogenicity in literature for heterozygous cases	Unknown	Unknown	Unknown	3	1							1																												1
COQ2	p.S54W	Not previously associated with disease	U	NS	0.01	0.14		Mis-sense variant. No convincing specific region for pathogenicity in literature for heterozygous cases	Unknown	Unknown	Unknown	1	0													1	1																					1
COQ2	p.G53R	Novel	U	NS	NS	NS		Well conserved region	Unknown	Unknown	Unknown	1	0													1	1																					1
MATR3	p.Y214C	Novel	U	NS	NS	NS		Mis-sense variant. No convincing specific region for pathogenicity in literature	Unknown	Unknown	Unknown	0	1							1																												1
MATR3	p.E262*	Novel	U	NS	NS	NS	0.0001377	Mis-sense variant. No convincing specific region for pathogenicity in literature	Unknown	Unknown	Unknown	1	0							1		1					1																					1
MATR3	p.V159M	Novel	U	NS	NS	NS	5.321e-05	Mis-sense variant. No convincing specific region for pathogenicity in literature	Unknown	Unknown	Unknown	1	0							1																												1
MATR3	p.A762T	Not previously associated with disease	U	NS	0.06	0.02		Mis-sense variant. No convincing specific region for pathogenicity in literature	Unknown	Unknown	Unknown	1	0																		1									1							1
MATR3	p.R503C	Not previously associated with disease	U	NS	NS	0.01		Mis-sense variant. No convincing specific region for pathogenicity in literature	Unknown	Unknown	Unknown	3	1																																			1
SQSTM1	p.S24G	Novel	U	NS	NS	NS		Mis-sense variant in PB1 domain	Unknown	Unknown	Unknown	0	1																																			1
SQSTM1	p.A33V	Not previously associated with disease	U	NS	0.08	0.12		Mis-sense variant in PB1 domain	Unknown	Unknown	Unknown	2	2																		1									1							1
SQSTM1	p.P111L	Not previously associated with disease	U	NS	0.01	0		Mis-sense variant in PB1 domain	Unknown	Unknown	Unknown	1	0																											1								1
SQSTM1	p.A33V	Previously described in 1 case of FALS and 2 cases of SALS (Fecto et al. 2011), but also seen in controls in relatively high frequency	U	0.08	0.12	0.15		Mis-sense variant in SH2 binding domain	Unknown	Unknown	Unknown	2	1																		1									1							1
SQSTM1	p.P118S	Not previously associated with disease	U	NS	0.01	0.02	6.531e-05	Mis-sense variant in PB1 domain	Unknown	Unknown	Unknown	4	0																																			1
SQSTM1	p.P50L	Not previously associated with disease	U	NS	0.01	0	1.426e-06	Mis-sense variant in PB1 domain	Unknown	Unknown	Unknown	1	0																																			1
SQSTM1	p.V150G	Novel	U	NS	NS	NS	0.001365	Sits in TRAF6 binding domain	Unknown	Unknown	Unknown	1	0							1						1																						1
SQSTM1	p.K238E	Seen in both cases of ALS and controls in equal measure (van der Zee et al. 2014)	U	0.24	0.35	0.24		Sits in TRAF6 binding domain	Unknown	Unknown	Unknown	17	1																		1																1
SQSTM1	p.G168V	Novel	U	NS	NS	NS	5.383e-06	Sits in TRAF6 binding domain	Unknown	Unknown	Unknown	0	1							1							1																					1
SQSTM1	p.P392L	Seen in 1 of 187 cases of FTD and 0 of 539 controls (Le Ber et al. 2013). Also detected in 0.97% of cases of ALS (Kwok et al. 2014), Known RF for Paget’s disease of bone.	Y – single study(van der Zee et al. 2014)	0.24	0.21	0.09	1.854e-06	Located in the Ubiquitin-associated domain	Osteoclasts harbouring this mutation show sensitivity to NF-kb (Kurihara et al. 2007)	Unknown	Unknown	9	0						1		1				1	1																						1
HNRNPA2B1	p.G323del	Novel	U	NS	NS	NS	1.191e-06	This sits within the nuclear targeting sequence! No previous pathogenic mutations described in this region	Unknown	Unknown	Unknown	1	0							1		1					1																					1
C9orf72	p.M332V	Not previously associated with disease	U	NS	0	0	1.549e-05	Unknown functional domain	Unknown	Unknown	Unknown	2	1																																			1
C9orf72	p.M318V	Novel	U	NS	NS	0	1.549e-05	Unknown functional domain	Unknown	Unknown	Unknown	1	0							1																												1
C9orf72	p.I138V	Novel	U	NS	NS	NS	0.0004102	Unknown functional domain	Unknown	Unknown	Unknown	1	0							1																												1
C9orf72	p.T49R	Seen previously in a single case of MND (Couthouis et al. 2014) but also seen in control databases.	U	0.02	0.02	0.02	0.005458	Unknown functional domain	Unknown	Unknown	Unknown	3	0																																			1
VCP	p.N616fs*12	Novel	U	NS	NS	NS		Contained within the D2 a/b region of which impaired function is unknown	Unknown	Unknown	Unknown	27	4							1		1				1	1																					1
VCP	p.N616fs*63	Novel	U	NS	NS	NS		Contained within the D2 a/b region of which impaired function is unknown	Unknown	Unknown	Unknown	3	0							1		1				1	1																					1
VCP	p.D501E	Novel	U	NS	NS	NS	0.006902	Contained with the ATPase binding cassette region	Unknown	Unknown	Unknown	1	0							1																				1							1
VCP	p.R453Q	Novel	U	NS	NS	NS	8.551e-05	Contained within the helical structural domain of the protein	Unknown	Unknown	Unknown	0	2							1																				1							1
VCP	p.R323L	Novel	U	NS	NS	NS	3.767e-07	Contained within the AAA2 region	Unknown	Unknown	Unknown	1	0							1																												1
VCP	p.I27V	Previously reported in 2 cases of IBMPFD (Mehta et al. 2013). Also seen in 1/768 cases of PD and 2 of 716 controls (aged in their 5th and 8th decades) (Majounie et al. 2012)	U	0.1	0.03	0.05	0.0004227	well-established functional domain (MopB_CT_1)	Unknown	Unknown	Unknown	1	0														1																					1
VCP	p.G9V	Novel	U	NS	NS	NS		Contained within the N-terminal region	Unknown	Unknown	Unknown	1	0							1																				1							1
HNRNPA1	p.F216L	Novel	U	NS	NS	NS		Situated in close proximity to previously described pathogenic mutations	Unknown	Unknown	Unknown	1	0						1	1						1																						1
DAO	p.R2S	Novel	U	NS	NS	NS		Situated in nucleotide binding domain. Functional impairment unclear	Unknown	Unknown	Unknown	1	1				1																															1
DAO	p.A8E	Novel	U	NS	NS	NS	4.853e-06	Situated in nucleotide binding domain. Functional impairment unclear	Unknown	Unknown	Unknown	1	0							1						1	1																					1
DAO	p.Q63E	Not previously associated with disease	U	NS	0.02	0.01		Functional impairment unclear	Unknown	Unknown	Unknown	1	1																											1							1
DAO	p.P103P	Not previously associated with disease	U	NS	0.02	0.01		Alters splicing	Unknown	Unknown	Unknown	1	0																																			1
DAO	p.R115W	Not previously associated with disease	U	NS	0.01	0.01		Situated in well conserved region	Unknown	Unknown	Unknown	1	0													1	1																					1
DAO	p.Y144H	Not previously associated with disease	U	0.3	0	0.08	3.133e-05	Situated in well conserved region	Unknown	Unknown	Unknown	2	0													1	1																					1
DAO	p.W260*	Novel	U	NS	NS	NS	2.851e-05	Involved in enzymatic activity (amino-acids Tyr228-His307)	Unknown	Unknown	Unknown	1	0						1							1	1																					1
ANG	p.G17V	Novel	U	NS	NS	NS		Situated in n-terminal region	Unknown	Unknown	Unknown	1	0							1																				1								1
ANG	p.I70V	Seen in equal numbers of cases and controls (Gellera et al. 2008)	U	0.02	0.06	0.06		Located in a critical and well-established functional domain (RNase_A_canonical)	Reduces ribonucleolytic activity (Crabtree et al. 2007)	Unknown	Unknown	2	1																											1								1
ANG	p.K78E	Previously described in isolated sporadic cases (Kirby et al. 2013) (Fernandez-Santiago et al. 2009), but also seen in reference databases.	U	NS	0.01	0.02	0.004477	Located in the second helix of the mature ANG protein	Predicted to lose nuclear-translocational activity (Padhi et al. 2013)	Unknown	Unknown	0	1																																			1
ANG	p.N83K	Novel	U	NS	NS	NS		Located in the second helix of the mature ANG protein	Unknown	Unknown	Unknown	1	0							1																				1								1
FUS	p.S57del	Seen in 1 of 200 patients and none of 475 controls (Belzil et al. 2011)	U	NS	NS	NS	0.0002742	Located in the QGSY-Region. Additional variants in these region are unlikely to be pathogenic (Cruts et al. 2012)	Unknown	Unknown	Does rescue the phenotype (Kabashi et al. 2011)	3	0							1												1															1
FUS	p.R379H	Not previously associated with disease	U	NS	NS	0	0.0004592	Located in the RRM region	Unknown	Unknown	Unknown	1	0													1														1								1
FUS	p.R483H	Not previously associated with disease	U	0.02	NS	0		Located in the RRM region	Unknown	Unknown	Unknown	0	1																											1								1
VPS35	p.V476A	Not previously associated with disease	U	NS	0.01	0	0.001374	Located in region which interacts with SLC11A2	Unknown	Unknown	Unknown	1	0																											1								1
VPS35	p.K296E	Novel	U	NS	NS	NS	9.795e-06	Located in a critical and well-established functional domain	Unknown	Unknown	Unknown	1	0							1						1																						1
VPS35	p.M57L	Not previously associated with disease	U	NS	NS	0	1.406e-05	Located in region which interacts with SLC11A2	Unknown	Unknown	Unknown	1	0							1																				1								1
VPS35	p.M30K	Unknown	U	NS	0	0.01	1.687e-05	Unknown	Unknown	Unknown	Unknown	1	0													1																						1
PFN1	p.V103F	Novel	U	NS	NS	NS		Located in a region which involved in a beta strand in the secondary protein	Unknown	Unknown	Unknown	1	0							1						1																						1
PFN1	Splice site alteration	Novel	U	NS	NS	NS	0.002735	Splice site altering variant. This is highly likely to result in a frameshift mutation (MaxEntScore decrease 100%)	Unknown	Unknown	Unknown	1	0							1		1																										1
PFN1	p.P29L	Novel	U	NS	NS	0	0.003573	Mis-sense variant between two beta-strands in the secondary structure	Unknown	Unknown	Unknown	1	0							1																												1
GRN	p.T18M	Not previously associated with disease	U	0.02	0.02	0		Situated in exon 2 - ParaGran region. Mutation at codon 19 is non-pathogenic (Gass et al. 2006)	Unknown	Unknown	Unknown	2	0							1																												1
GRN	p.P50T	Novel	U	NS	NS	NS		Sits between Paragranulin and Granulin-1 domains	Unknown	Unknown	Unknown	1	0							1																												1
GRN	p.M286T	Novel	U	NS	NS	NS		Mis-sense variant in the Granulin-4 domain	Unknown	Unknown	Unknown	1	0							1																				1							1
GRN	p.E287D	Seen previously in a single patient (Gass et al. 2006)	U	NS	0.01	0		Mis-sense variant in the Granulin-4 domain	Unknown	Unknown	Unknown	1	0																																			1
GRN	p.C404F	Not seen previously	U	NS	NS	NS	5.176e-06	Located in GranC region. Unclear whether mutations in this region are pathogenic	Unknown	Unknown	Unknown	1	0							1						1	1																					1
GRN	p.R418Q	Seen in control databases and also seen in controls (Gass et al. 2006; Le Ber et al. 2007)	U	NS	0.02	0.02		Located in Exon 11 - InterCD region	Unknown	Unknown	Unknown	2	0																	1																		1
GRN	p.V514M	Seen previously in a familial AD case (Cruchaga et al. 2012)	U	NS	0.05	0		Sits between Granulin-6 and Granulin-7 domains	Unknown	Unknown	Unknown	2	0																	1										1							1
GRN	p.A588S	Not previously associated with disease	U	NS	NS	0.05		Located after Granulin-7 domain	Unknown	Unknown	Unknown	30	7							1																												1
MAPT	p.S501I	Novel	U	NS	NS	NS	0.000236	Located outside the tubulin binding domain	Unknown	Unknown	Unknown	0	1							1																				1								1
MAPT	p.A210T	Previously described in a patient with FTLD (King et al. 2013), but also seen in control databases.	U	0.02	0.14	0.08		Located outside the tubulin binding domain	Unknown	Unknown	Unknown	4	2																	1	1									1							1
NOTCH3	p.T2270M	Not previously associated with disease	U	NS	0	0.01	3.214e-05	Located outside an EGF domain and doesn't affect cysteine residue	Unknown	Unknown	Unknown	1	0							1																				1							1
NOTCH3	p.P2222L	Novel	U	NS	NS	NS	0.000415	Located outside an EGF domain and doesn't affect cysteine residue	Unknown	Unknown	Unknown	1	0							1																				1							1
NOTCH3	p.P2209L	Not previously associated with disease	U	0.04	NS	0.07		Located outside an EGF domain and doesn't affect cysteine residue	Unknown	Unknown	Unknown	1	0							1																				1							1
NOTCH3	p.A2190V	Not previously associated with disease	U	0.02	NS	0.02		Located outside an EGF domain and doesn't affect cysteine residue	Unknown	Unknown	Unknown	1	0							1										1										1							1
NOTCH3	p.R2150S	Novel	U	NS	NS	NS	0.0004178	Located outside an EGF domain and doesn't affect cysteine residue	Unknown	Unknown	Unknown	1	0							1																				1							1
NOTCH3	p.P2115L	Novel	U	NS	NS	NS	0.0005559	Located outside an EGF domain and doesn't affect cysteine residue	Unknown	Unknown	Unknown	1	0							1																				1							1
NOTCH3	p.V2021M	Not previously associated with disease	U	0.04	NS	0.02	6.808e-06	Not present in EGF and doesn't alter cysteine residue	Unknown	Unknown	Unknown	2	0							1										1										1							1
NOTCH3	p.A1947V	Not previously associated with disease	U	NS	NS	0.01	3.381e-06	Located outside an EGF domain and doesn't affect cysteine residue	Unknown	Unknown	Unknown	0	1							1																				1							1
NOTCH3	p.V1762M	Described in a single case with a CADASIL like phenotype (Bersano et al. 2012)	U	NS	NS	0.02		Not present in EGF and doesn't alter cysteine residue	Unknown	Unknown	Unknown	1	0							1										1										1							1
NOTCH3	p.S1420R	Novel	U	NS	NS	NS		Located outside an EGF domain and doesn't affect cysteine residue	Unknown	Unknown	Unknown	1	0							1																				1							1
NOTCH3	p.P1408S	Novel	U	NS	NS	NS		Located outside an EGF domain and doesn't affect cysteine residue	Unknown	Unknown	Unknown	0	1							1																				1							1
NOTCH3	p.C1405F	Novel	U	NS	NS	NS	4.71e-06	Not present in EGF but does alter cysteine residue				0	1							1																				1								1
NOTCH3	p.E1404D	Novel	U	NS	NS	NS		Located outside an EGF domain and doesn't affect cysteine residue	Unknown	Unknown	Unknown	0	1							1																				1							1
NOTCH3	p.D1398Y	Novel	U	NS	NS	NS	0.001803	Situated outside an EGF domain and doesn't affect a cysteine residue	Unknown	Unknown	Unknown	1	0							1																				1							1
NOTCH3	p.R1285P	Novel	U	NS	NS	NS		Located within an EGF domain but doesn't affect cysteine residue	Unknown	Unknown	Unknown	1	0							1																				1							1
NOTCH3	p.G1269V	Novel	U	NS	NS	0		Located within an EGF domain but doesn't affect cysteine residue	Unknown	Unknown	Unknown	1	0							1																				1							1
NOTCH3	p.Q1253P	Novel	U	NS	NS	0.01		Located within an EGF domain but doesn't affect cysteine residue	Unknown	Unknown	Unknown	1	0							1										1										1							1
NOTCH3	p.R1242H	Not previously associated with disease	U	0.04	0.02	0		Located within an EGF domain but doesn't affect cysteine residue	Unknown	Unknown	Unknown	0	1																											1							1
NOTCH3	p.C1222G	Not previously associated with disease	U	NS	0.05	0.01	0.001972	Situated in EGF and affects cysteine but not seen in association with vascular disease in this cohort	Unknown	Unknown	Unknown	1	0						1	1						1														1								1
NOTCH3	p.A1213D	Novel	U	NS	NS	NS		Located within an EGF domain but doesn't affect cysteine residue	Unknown	Unknown	Unknown	1	0							1																				1							1
NOTCH3	p.M1107I	Not previously associated with disease	U	0.02	NS	0		Located within an EGF domain but doesn't affect cysteine residue	Unknown	Unknown	Unknown	1	0							1																				1							1
NOTCH3	p.C997*	Novel	U	NS	NS	NS		Situated in EGF and affects cysteine but not seen in association with vascular disease in this cohort	Unknown	Unknown	Unknown	1	0	1					1	1						1																						1
NOTCH3	p.S991R	Novel	U	NS	NS	NS		Located within an EGF domain but doesn't affect cysteine residue	Unknown	Unknown	Unknown	2	0							1																				1							1
NOTCH3	p.H981Y	Previously seen in healthy cases (Ross et al. 2013)	U	NS	NS	0		Located within an EGF domain but doesn't affect cysteine residue	Unknown	Unknown	Unknown	1	0							1																				1							1
NOTCH3	p.S947R	Novel	U	NS	NS	NS		In EGF domain but doesn't affect cysteine residue	Unknown	Unknown	Unknown	1	0							1																				1							1
NOTCH3	p.P913L	Not previously associated with disease	U	NS	0.01	0		Located within an EGF domain but doesn't affect cysteine residue	Unknown	Unknown	Unknown	1	0																											1							1
NOTCH3	p.S893N	Novel	U	NS	NS	NS	1.622e-06	In EGF domain but doesn't affect cysteine residue	Unknown	Unknown	Unknown	1	0							1																				1							1
NOTCH3	p.G878R	Novel	U	NS	NS	NS	1.622e-06	Located within an EGF domain but doesn't affect cysteine residue	Unknown	Unknown	Unknown	0	1							1																				1							1
NOTCH3	p.G869A	Not previously associated with disease	U	NS	NS	0		Located within an EGF domain but doesn't affect cysteine residue	Unknown	Unknown	Unknown	1	0							1																				1							1
NOTCH3	p.A815D	Novel	U	NS	NS	NS		Located within an EGF domain but doesn't affect cysteine residue	Unknown	Unknown	Unknown	1	0							1																				1							1
NOTCH3	p.P761L	Not previously associated with disease	U	NS	0	0		Located within an EGF domain but doesn't affect cysteine residue	Unknown	Unknown	Unknown	0	1																											1							1
NOTCH3	p.V644D	Not previously associated with disease	U	0.02	0.09	0.07	3.396e-05	Located within an EGF domain but doesn't affect cysteine residue	Unknown	Unknown	Unknown	3	1																	1										1							1
NOTCH3	p.R544H	Novel	U	NS	NS	0		Located within an EGF domain but doesn't affect cysteine residue	Unknown	Unknown	Unknown	1	1							1																				1							1
NOTCH3	p.A534S	Novel	U	NS	NS	NS	0.001	Located within an EGF domain but doesn't affect cysteine residue	Unknown	Unknown	Unknown	1	1							1																				1							1
NOTCH3	p.R532L	Novel	U	NS	NS	NS	0.005888	Located within an EGF domain but doesn't affect cysteine residue	Unknown	Unknown	Unknown	1	0							1																				1							1
NOTCH3	p.G490A	Not previously associated with disease	U	NS	0.01	0	2.547e-06	Located within an EGF domain but doesn't affect cysteine residue	Unknown	Unknown	Unknown	1	0																											1							1
NOTCH3	p.P426L	Not previously associated with disease	U	NS	NS	0	0.0002198	In EGF domain but doesn't affect cysteine residue	Unknown	Unknown	Unknown	1	0							1						1														1							1
NOTCH3	p.E403D	Novel	U	NS	NS	NS		In EGF domain but doesn't affect cysteine residue	Unknown	Unknown	Unknown	1	0							1																				1							1
NOTCH3	p.L295R	Not previously associated with disease	U	0.02	0.07	0.02		Located within an EGF domain but doesn't affect cysteine residue	Unknown	Unknown	Unknown	2	0																	1										1							1
NOTCH3	p.G248A	Not previously associated with disease	U	0.02	NS	0.01	0.0007345	In EGF domain but doesn't affect cysteine residue	Unknown	Unknown	Unknown	1	0							1																				1							1
NOTCH3	p.H170R	Not previously associated with disease	U	0.14	0.15	0.19	2.818e-05	Located within an EGF domain but doesn't affect cysteine residue	Unknown	Unknown	Unknown	7	3																	1										1							1
NOTCH3	p.R169H	Not previously associated with disease	U	NS	NS	0		Present in EGF domain but does not affect cysteine residue	Unknown	Unknown	Unknown	1	0							1																				1								1
NOTCH3	p.R113Q	Not previously associated with disease	U	NS	0.07	0.08		Located within an EGF domain but doesn't affect cysteine residue	Unknown	Unknown	Unknown	1	1																	1	1																1
NOTCH3	p.A102V	Novel	U	NS	NS	NS	0.004592	Located within an EGF domain but doesn't affect cysteine residue	Unknown	Unknown	Unknown	1	0																																		1
NOTCH3	p.V97A	Novel	U	NS	NS	NS	0.0009817	Located within an EGF domain but doesn't affect cysteine residue	Unknown	Unknown	Unknown	1	0																																		1
NOTCH3	p.S95R	Not previously associated with disease	U	NS	NS	0	4.688e-05	Located within an EGF domain but doesn't affect cysteine residue	Unknown	Unknown	Unknown	0	1																																		1
PRNP	p.R48H	Novel	U	NS	NS	NS	0.0009016	Sits in N-terminal region, no pathogenic mutations have been seen in this region before (Beck et al. 2010) (Mead 2006)	Unknown	Unknown	Unknown	1	0							1						1	1																					1
PRNP	p.G54S	Seen in healthy controls (Beck et al. 2010; Forbes et al. 2014)	U	NS	NS	0.07	0.0009016	Sits in N-terminal region, no pathogenic mutations have been seen in this region before (Beck et al. 2010) (Mead 2006)	Unknown	Unknown	Unknown	0	1							1																											1
PRNP	p.W26L	No point mutations within this region have been described as being pathogenic (Mead 2006)	U	NS	NS	NS		Present in N-terminal domain	Unknown	Unknown	Unknown	1	0							1						1	1																					1
PRNP	p.R164M	Novel	U	NS	NS	NS		Present in major coding region	Unknown	Unknown	Unknown	1	0							1						1	1																					1
PRNP	p.K194R	Novel	U	NS	NS	NS	0.002223	Present in major coding region	Unknown	Unknown	Unknown	0	1							1																												1
VAPB	p.S160del	Seen in equal frequency between cases and controls (Landers et al. 2008), but seen in one fALS case and none of > 300 controls (Kabashi et al. 2013)	U	NS	NS	NS		Sits within exon 5, but lies outside the MSP domain	Alters the structure of the protein but retains normal subcellular localisation (Landers et al. 2008)	Mutant protein does not rescue the phenotype (Landers et al. 2008)	No	11	0																	1		1															1
VAPB	p.M170I	High frequency in population databases	U	0.1	0.16	0.14	6.745e-07	Located near MSP domain	Unknown	Unknown	Unknown	5	1																	1	1																1
VAPB	p.F231L	Novel	U	NS	NS	NS	2.71e-05	Located in the transmembrane domain	Unknown	Unknown	Unknown	0	1							1							1																					1
APP	p.I665V	Not previously associated with disease	U	NS	NS	0	0.0006095	Sits within TM-I	Unknown	Unknown	Unknown	1	1						1	1																												1
APP	p.T553M	Not previously associated with disease	U	NS	NS	0	0.002723	Not within TM domain	Unknown	Unknown	Unknown	0	1							1																				1								1
APP	p.T525M	Not previously associated with disease	U	NS	NS	0.01	0.0001466	Not within TM domain	Unknown	Unknown	Unknown	0	1							1																												1
APP	p.E489K	Not previously associated with disease	U	0.06	0.1	0.13	0.0001466	Not within TM domain	Unknown	Unknown	Unknown	1	0																	1	1									1							1
APP	p.C285F	Novel	U	NS	NS	NS	4.207e-06	Not within TM domain	Unknown	Unknown	Unknown	1	0							1																												1
APP	p.M338V	Not previously associated with disease	U	0	0.01	0		Not within TM domain	Unknown	Unknown	Unknown	1	0																											1								1
APP	p.R328W	Not previously associated with disease	U	NS	NS	0.02	0.004592	Not within TM domain	Unknown	Unknown	Unknown	1	0							1						1	1																					1
APP	p.R250L	Not previously associated with disease	U	0	0.01	0	3.899e-06	Not within TM domain	Unknown	Unknown	Unknown	1	0							1						1	1																					1
APP	p.A295S	Novel	U	NS	NS	NS	3.899e-06	Not within TM domain	Unknown	Unknown	Unknown	1	0																																			1
APP	p.S198P	Not previously associated with disease	U	NS	0.07	0.05	0.001042	Not within TM domain	Unknown	Unknown	Unknown	0	1																																			1
SOD1	p.Q16R	Novel	U	NS	NS	NS		Sits in N-terminal region and in which several pathogenic mutations have been described	Unknown	Unknown	Unknown	1	0							1						1																						1
CHCHD10	p.Y135H	Not previously associated with disease	U	NS	0.08	0.03		Sits distal to the CHCH domain	Unknown	Unknown	Unknown	2	0																	1	1									1							1
CHCHD10	p.P80L	Not previously associated with disease	U	NS	NS	0.03	1.442e-05	Sits within the non-structured domain between the hydrophobic helix ad CHCH domain	Unknown	Unknown	Unknown	1	0							1																				1								1
CHCHD10	p.M48K	Novel	U	NS	NS	NS	0.00317	Sits within the hydrophobic helix in which previous pathogenic mutations have been described	Unknown	Unknown	Unknown	0	1							1																												1
CHCHD10	p.P34S	Described previously in 2 cases of FTD-ALS (Chaussenot et al. 2014)	U	0.04	NS	0.11		Sits within the nonstructured N-terminal region, and the biological relevance is unknown	Unknown	Unknown	Unknown	12	2							1																				1								1
UBQLN2	p.A28P	Novel	U	NS	NS	NS		Sits within a nonstructured domain	Unknown	Unknown	Unknown	1	0							1																				1								1
UBQLN2	p.S140R	Novel	U	NS	NS	NS		Sits within a nonstructured domain	Unknown	Unknown	Unknown	1	0							1																				1								1
UBQLN2	p.S301P	Novel	U	NS	NS	NS		Sits within a nonstructured domain	Unknown	Unknown	Unknown	1	0							1																												1
UBQLN2	p.M563I	Novel	U	NS	NS	NS	5.875e-05	Sits within a nonstructured domain	Unknown	Unknown	Unknown	1	0							1																												1
			219	182	149	98						611
[truncated: 5 more columns]

## Sheet: Benign
MacArthur Criteria														ACMG Criteria
														Pathogenic															Benign															ACMG classification
Variant		Genetic					Informatic		Experimental			Number of cases		Very Strong	Strong			Moderate						Supporting					Strong								Supporting							Pre-assessment					Post-assessment
Gene	Protein alteration	Association (cases vs controls)	Segregation	1000G MAF (%)	6500 ESP MAF (%)	ExAC MAF (%)	Conservation	Location (appropriate)	Gene disruption	Phenotype recapitulation	Rescue	Number of cases	Number of controls	PSV1	PS1	PS2	PS3	PS4	PM1	PM2	PM3	PM4	PM5	PM6	PP1	PP2	PP3	PP4	PP5	BS1	BS2	BS3	BS4	BS5	BS6	BS7	BP1	BP2	BP3	BP4	BP5	BP6	BP7	P	LP	B	LB	US	P
PSEN2	p.R71W	Seen in both cases and controls, but does confer and earlier disease onset (Cruchaga et al. 2012)	U	0.14	0.37	0.34		Located in N-terminal domain	Unknown	Unknown	Unknown	8	3																	1	1																1
DCTN1	p.T1224I	Previously associated with a single case of ALS (Munch et al. 2004) However, the MAF has subsequently been shown to be high in population databases	U	0.1	0.45	0.3	0.0003436	Located within the coiled coil domain	Does not result in abnormal cellular morphology in vitro (Stockmann et al. 2013)	Does not result in abnormal cellular morphology in vitro (Stockmann et al. 2013)	Unknown	18	4																	1	1															1
GIGYF2	p.L1230Q	Not previously associated with disease	U	NS	NS	0		Mis-sense variant. No convincing specific region for pathogenicity in literature	Unknown	Unknown	Unknown	38	5																										1	1						1
GRN	p.A324T	Seen in several cases in healthy subjects. No evidence acts as a risk factor (Cruchaga et al. 2012)	U	0.1	0.14	0.08		Mis-sense variant in the Granulin-4 domain	Unknown	Unknown	Unknown	4	1																	1	1															1
GRN	p.R433W	Seen relatively commonly in control databases	U	0.16	0.28	0.43		Mis-sense variant between Granulin 5 and Granulin-6 domain	Does not alter GRN plasma levels (Finch et al. 2009)	Unknown	Unknown	11	1																	1	1	1														1
MAPT	p.S427F	Seen in 1 of 436 familial cases of AD, and none of 1346 controls (Cruchaga et al. 2012)	U	0.1	0.21	0.15	0.001259	Present in the inter CD region of the gene	Unknown	Unknown	Unknown	3	0																	1	1															1
VAPB	p.D130E	Seen in cases and controls and is also present in reference databases (Landers et al. 2008)	U	0.1	0.1	0.14		Located in the topological domain	Unknown	Unknown	Unknown	1	0																	1	1															1
												97
				1	1	0
[truncated: 5 more columns]

## Sheet: Sheet5
LB
1
1
1
1
1
1
1
1
1
1
1
1
1
1
1
1
1
1
1
1
1
1
1
1
1
1
1
1
1
1
1
1
1
1
1
1
1
1
1
1
1
1
1
1
1
1
1
1
1
1
1
1
1
1
1
1
1
1
1
1
1
1
1
1
1
1
1
1
1
1
1
1
1
